# Supplementary material for: Colorectal Cancer Cell Lines Are Representative Models of the Main Molecular Subtypes of Primary Cancer
Source: Oxford University Press journal article supplement (doi:10.1158/0008-5472.can-14-0013), 2014-04-23
Supplement: 00085472can140013-sup-124637_1_supp_2385072_n2k5fv.xlsx [file 00085472can140013-sup-124637_1_supp_2385072_n2k5fv.xlsx]

## Sheet: Sheet1
Cohort	Samplename	Subtype	Variant	NtChange	AAChange	POLE domain
TCGA cancer	TCGA-AA-3555-01A-01W-0831-10	NSHP	missense	c.C857>A	p.P286H	DNA-directed DNA polymerase, family B, exonuclease domain
TCGA cancer	TCGA-AA-3977-01A-01W-0995-10	NSHP	missense	c.G2331>T	p.K777N	DNA-directed DNA polymerase, family B, multifunctional domain
TCGA cancer	TCGA-AA-3977-01A-01W-0995-10	NSHP	missense	c.T1100>C	p.F367S	DNA-directed DNA polymerase, family B, exonuclease domain
TCGA cancer	TCGA-AA-3984-01A-02W-0995-10	NSHP	missense	c.G1231>T	p.V411L	DNA-directed DNA polymerase, family B, exonuclease domain
TCGA cancer	TCGA-AG-3892-01A-01W-1073-09	NSHP	missense	c.C1376>T	p.S459F	Ribonuclease H like domain
TCGA cancer	TCGA-AG-A002-01A-01W-A00K-09	NSHP	missense	c.C1376>T	p.S459F	Ribonuclease H like domain
TCGA cancer	TCGA-AG-A002-01A-01W-A00K-09	NSHP	missense	c.C448>T	p.R150X	DNA-directed DNA polymerase, family B, exonuclease domain
TCGA cancer	TCGA-AA-A00N-01A-02W-A00E-09	NSHP	missense	c.T3763>G	p.L1255V	NA
TCGA cancer	TCGA-AA-A00N-01A-02W-A00E-09	NSHP	missense	c.G1231>T	p.V411L	DNA-directed DNA polymerase, family B, exonuclease domain
TCGA cancer	TCGA-AA-A010-01A-01W-A00E-09	NSHP	missense	c.C1307>G	p.P436R	Ribonuclease H like domain
TCGA cancer	TCGA-AA-A010-01A-01W-A00E-09	NSHP	missense	c.G565>A	p.A189T	DNA-directed DNA polymerase, family B, exonuclease domain
TCGA cancer	TCGA-AA-3518-01A-02W-0833-10	MSI-H	missense	c.G4102>A	p.V1368M	NA
TCGA cancer	TCGA-AA-3525-01A-02W-0833-10	MSI-H	missense	c.C6638>T	p.A2213V	NA
TCGA cancer	TCGA-AA-3525-01A-02W-0833-10	MSI-H	missense	c.G3024>T	p.K1008N	DNA-directed DNA polymerase, family B, multifunctional domain
TCGA cancer	TCGA-AA-3525-01A-02W-0833-10	MSI-H	missense	c.C2284>T	p.R762W	DNA-directed DNA polymerase, family B, multifunctional domain
TCGA cancer	TCGA-AA-3710-01A-01W-0995-10	MSI-H	missense	c.C4261>T	p.P1421S	NA
TCGA cancer	TCGA-AA-3833-01A-01W-0900-09	MSI-H	De_novo_Start_OutOfFrame	NA	NA	NA
TCGA cancer	TCGA-AA-3864-01A-01W-0995-10	MSI-H	missense	c.G692>A	p.R231H	DNA-directed DNA polymerase, family B, exonuclease domain
TCGA cancer	TCGA-AA-A00J-01A-02W-A005-10	MSI-H	missense	c.G6166>A	p.A2056T	NA
TCGA cancer	TCGA-AA-3678-10A-01W-0900-09	Non-hyper	missense	c.G5254>A	p.D1752N	DNA polymerase epsilon, catalytic subunit A, C-terminal
TCGA cancer	TCGA-AG-A01W-11A-11W-A096-10	Non-hyper	missense	c.G6037>A	p.D2013N	NA
Cell line	HT115	NSHP	missense	c.3703C>A	p.L1235I	NA
Cell line	HT115	NSHP	missense	c.1231G>T	p.V411L	DNA-directed DNA polymerase, family B, exonuclease domain
Cell line	LIM2405	MSI-H	missense	c.3056G>T	p.S1019I	DNA-directed DNA polymerase, family B, multifunctional domain
Cell line	LIM2551	MSI-H	missense	c.5065A>G	p.T1689A	DNA polymerase epsilon, catalytic subunit A, C-terminal
Cell line	SNU175	MSI-H	missense	c.2551G>A	p.E851K	DNA-directed DNA polymerase, family B, multifunctional domain
Cell line	SNUC1	Non-hyper	missense	c.3895G>A	p.E1299K	NA
Cell line	SNUC4	MSI-H	missense	c.4582G>C	p.A1528P	NA
Cell line	HCC2998	NSHP	missense	c.857C>G	p.P286R	DNA-directed DNA polymerase, family B, exonuclease domain
Cell line	HCT15	MSI-H	missense	c.4124C>T	p.A1375V	NA
Cell line	KM12	MSI-H	missense	c.4555C>T	p.R1519C	NA
Cell line	RKO	MSI-H	missense	c.2983A>G	p.K995E	DNA-directed DNA polymerase, family B, multifunctional domain
Cell line	LIM1899	MSI-H	frameshift	2136delA	NA	DNA-directed DNA polymerase, family B, multifunctional domain
Cell line	LIM2405	MSI-H	frameshift	1231delT	NA	DNA-directed DNA polymerase, family B, exonuclease domain
Cell line	KM12	MSI-H	frameshift	2136insG	NA	DNA-directed DNA polymerase, family B, multifunctional domain
