# Supplementary material for: Colorectal Cancer Cell Lines Are Representative Models of the Main Molecular Subtypes of Primary Cancer
Source: Oxford University Press journal article supplement (doi:10.1158/0008-5472.can-14-0013), 2014-04-23
Supplement: 00085472can140013-sup-124637_1_supp_2385074_n2k5fv.xlsx [file 00085472can140013-sup-124637_1_supp_2385074_n2k5fv.xlsx]

## Sheet: cell_line_expression_rpkm
Refseq Name	Common Name	COLO320-DM	DLD1	HCA7	LIM1863	LIM2405	LIM2537	LS513	RW2982	SKCO1	SW1417	SW1463	SW48	T84	Covered in TrueSeq Exome Capture
NM_000014	A2M	0.03593	0.258951	0.80403	0.0136982	0.0146318	0.174055	0	0.0184955	0	0.00302435	0.00396964	0.0241967	0.0711421	Yes
NM_000015	NAT2	0.0922495	0.156028	0.0721513	2.38939	0.0445847	0.0480902	0.316257	0.489478	0.0630841	0.0430058	0.211679	0.0430093	0.843026	Yes
NM_000016	ACADM	43.8639	27.3745	36.0178	10.3752	36.5025	23.4286	27.214	19.6887	12.7013	16.9469	33.6967	3.77038	11.6146	Yes
NM_000017	ACADS	6.45518	4.47841	11.7957	25.0591	15.8844	21.5694	14.8854	14.1917	9.09659	4.63629	33.9237	22.9095	34.1359	Yes
NM_000018	ACADVL	23.9834	130.272	117.732	112.79	64.1367	164.244	181.385	154.98	170.499	104.073	83.8661	109.069	109.302	Yes
NM_000019	ACAT1	89.7465	51.8912	56.1119	27.2787	68.0375	39.7473	25.0999	24.4406	14.3333	34.6599	42.787	53.3244	33.6946	Yes
NM_000020	ACVRL1	0.00876178	0.0208706	0.465995	0.0481019	0.0114688	0.024741	2.44235	0.0699089	0.358627	0.474586	0.762318	0.00531048	1.45727	Yes
NM_000021	PSEN1	7.43475	16.9938	13.9537	15.8995	18.0476	16.1388	13.1217	9.35506	14.6566	11.5829	20.1205	11.9315	17.2752	Yes
NM_000022	ADA	9.29915	5.68261	10.7865	0.68502	6.65263	17.1505	5.57533	4.34376	1.63021	12.133	6.77517	8.47999	2.06793	Yes
NM_000023	SGCA	0	0	0.0507317	0	0	0.00293051	0.010512	0	0.0336368	0.0393102	0	0	0.0110083	Yes
NM_000024	ADRB2	0	0.0201469	0.838481	0.00838388	0.00959492	0	0.534584	0	0.230794	2.76266	0	0	0.419869	Yes
NM_000025	ADRB3	0	0	0	0	0	0	0	0	0	0	0	0	0	Yes
NM_000026	ADSL	114.348	58.6104	81.3625	34.2239	50.0135	41.4528	69.2462	49.0918	36.1395	35.8488	44.4908	48.155	39.5311	Yes
NM_000027	AGA	15.2035	9.97642	4.39027	5.83181	10.428	1.93508	2.11975	7.28531	1.75074	2.79458	5.5109	18.4834	2.58856	Yes
NM_000028	AGL	9.24845	11.2531	6.6348	4.9018	11.1411	9.61594	3.23019	3.11246	2.64461	2.43333	6.21864	3.2447	3.5918	Yes
NM_000029	AGT	0	0.0238747	0.0424628	62.7805	0	0.0228934	0.0703889	0.104336	0.0509458	0.0274191	4.98091	0.0175496	0.061427	Yes
NM_000030	AGXT	0	0.319764	0	0.447102	0	0.00788452	0.0235687	0.113789	0.00861901	0.237969	0.543717	0	0.108599	Yes
NM_000031	ALAD	9.29825	5.43433	12.4186	16.1285	9.35639	18.1114	13.9938	5.46802	5.42132	10.9721	9.24564	6.65481	8.25325	Yes
NM_000032	ALAS2	0	0	0	0	0	0	0	0	0	0	0	0	0	Yes
NM_000033	ABCD1	0	0	0	0	0	0	0	0	0	0	0	0	0	Yes
NM_000034	ALDOA	712.807	396.431	562.625	1182.88	572.327	581.218	590.896	319.219	492.769	419.737	391.358	384.47	702.45	Yes
NM_000035	ALDOB	0.00384385	0.011269	0.0962047	24.3788	0.0523268	0.0225764	0.0716392	0.114763	0.0113905	0.0232956	2.47672	0.0139785	0.0130472	Yes
NM_000036	AMPD1	0	0.00849712	0	0	0	0.0192056	0	0.0119358	0	0	0	0	0	Yes
NM_000037	ANK1	0	0.0386827	0.351318	0.00359622	0.248117	6.93695	0.0263885	0.0404637	0.0066553	0.008507	0.0111659	0	0.0343048	Yes
NM_000038	APC	3.60246	6.02437	2.09276	2.66623	7.18445	3.36181	2.93891	0.543412	0.935631	2.1669	0.708447	1.5415	2.2543	Yes
NM_000039	APOA1	0.166211	0.0228413	0.235624	1.22141	0.0870251	0.506885	0.0336711	0.0641697	0.123134	0	0.206588	0.528885	0.0352609	Yes
NM_000040	APOC3	0	0	0	0.414651	0	0	0	0	0	0.0528163	0.242636	0	0.118324	Yes
NM_000041	APOE	0.956531	0.579393	1.08819	0.0940319	3.12082	17.79	0.0896805	0.512734	0.333815	3.19795	0.81749	0.297062	0.872066	Yes
NM_000042	APOH	0	0.0170224	0.0423855	0.148757	0	0.0349771	0	0.0956442	0.0458825	0	0.0923753	0	0.13139	Yes
NM_000043	FAS	0.669546	7.60754	2.63465	0.303141	13.6556	6.5735	8.99559	0.51788	3.38218	8.13656	0.986563	3.06985	5.19295	Yes
NM_000044	AR	0	0	0	0	0	0	0	0	0	0	0	0	0	Yes
NM_000045	ARG1	0.0695659	0.0231757	0.044517	0.0144664	0.0132449	0.0200008	0.0666198	0.0390655	0.0187405	0.00958187	0.0125768	0.00766611	0.0214663	Yes
NM_000046	ARSB	2.51893	2.95322	1.39812	0.514919	3.20526	1.70916	0.981893	0.649913	1.01746	1.29238	0.560338	1.54538	0.891067	Yes
NM_000047	ARSE	0	0	0	0	0	0	0	0	0	0	0	0	0	Yes
NM_000048	ASL	9.61378	20.5063	15.3084	25.9709	52.2731	24.6254	53.9646	46.666	44.4443	27.658	33.5198	28.5011	63.7922	Yes
NM_000049	ASPA	0	0.00481742	0	0	0	0.00296962	0	0	0	0	0	0	0	Yes
NM_000050	ASS1	27.1654	75.9017	42.9534	40.234	17.4518	56.5298	547.969	31.669	92.7756	50.2199	44.2373	91.5702	152.996	Yes
NM_000051	ATM	3.27061	5.94032	1.15101	4.01075	3.01901	4.68138	1.93084	0.731647	0.406801	4.29622	4.61888	1.60268	1.33718	Yes
NM_000052	ATP7A	0	0	0	0	0	0	0	0	0	0	0	0	0	Yes
NM_000053	ATP7B	3.76245	3.34557	0.613162	16.776	2.59963	4.18493	13.3313	1.55202	1.37493	2.11376	16.4036	1.35564	1.04438	Yes
NM_000054	AVPR2	0	0	0	0	0	0	0	0	0	0	0	0	0	Yes
NM_000055	BCHE	0.00763751	0	0	0	0	0.00345062	0.00618883	0.0117946	0	0.0405011	0	0	0	Yes
NM_000056	BCKDHB	17.4424	8.0905	10.6174	11.6365	8.97868	16.8255	16.1697	2.84578	3.32707	3.95183	12.1984	2.46396	11.3261	Yes
NM_000057	BLM	9.15201	10.3473	4.29581	9.06104	10.0338	4.58469	6.81597	5.68639	6.97971	7.92899	3.84136	5.41359	6.75899	Yes
NM_000059	BRCA2	3.01304	3.80597	0.768427	5.1225	3.33634	1.60212	3.20442	1.6329	0.423464	1.03256	3.02208	0.501034	0.839277	Yes
NM_000060	BTD	2.34786	9.74128	8.5625	2.84988	2.57228	7.18414	3.55943	1.99336	3.69321	7.36818	3.50861	1.83157	2.7102	Yes
NM_000061	BTK	0	0	0	0	0	0	0	0	0	0	0	0	0	Yes
NM_000062	SERPING1	0	0.00695036	0.404227	0.0065077	1.29094	2.60065	0	0.00488153	0.0140506	0.0790237	0	0	0.0804713	Yes
NM_000063	C2	1.17653	0.124902	0.0410117	17.2977	0.116681	0.119933	6.94706	1.41033	0.140816	5.11436	14.0058	0.468771	0.322595	Yes
NM_000064	C3	0.0091013	0.0840491	0.15091	0.0374743	0.710978	0.0962197	0.0117999	0.191149	0.035061	10.196	0.119457	0.0419236	0.179178	Yes
NM_000065	C6	0.185956	0.00378588	0	0.0153606	0	0	0.00418566	0.0239308	0	0	0	0	0.0175331	Yes
NM_000066	C8B	0	0	0	0.12748	0	0	0	0	0	0	0	0	0	Yes
NM_000067	CA2	6.55128	11.8912	2.62543	2.98695	63.4881	22.2129	0.194937	0	0.00414464	0.864602	0.0556295	0.264488	4.6905	Yes
NM_000068	CACNA1A	0	0.0031602	0.00590165	0.00493155	0.13884	0.0131493	0.00349391	0.00998795	0	0.0865602	1.02468	0.0405069	0.045736	Yes
NM_000069	CACNA1S	0.0105471	0.0110432	0.00471383	0.00137864	0.0205112	0.00408442	0.00488371	0.00155122	0.00111623	0.0319601	0.00898919	0.00182644	0.0127858	Yes
NM_000070	CAPN3	0.243802	0.283438	0.276166	0.464104	0.275842	0.08736	0.588132	0.184645	0.249125	0.611404	0.167188	0.349887	0.26158	Yes
NM_000071	CBS	161.073	0.0289452	0.227452	0.0837689	5.65064	0.0794813	0.19201	24.4212	0.614404	0.16319	0.328434	0.0478728	0.560576	Yes
NM_000072	CD36	80.2033	0.0129556	0.162449	0.008087	0	0.125784	0.802128	1.01457	0	2.22292	0.0439415	312.305	0.0975002	Yes
NM_000073	CD3G	0	0.00520486	0	0	0	0	0	0.0146224	0	0	0	0	0	Yes
NM_000074	CD40LG	0	0	0	0	0	0	0	0	0	0	0	0	0	Yes
NM_000075	CDK4	255.694	88.4327	112.522	150.03	97.1929	84.48	102.808	90.0477	87.2648	108.412	122.016	63.9206	168.705	Yes
NM_000076	CDKN1C	0.276	3.3679	4.65821	2.72032	1.86593	17.475	4.54751	4.07779	5.28031	10.2489	3.61102	1.62	3.27891	Yes
NM_000077	CDKN2A	28.0123	0.130979	1.95099	28.094	6.47956	157.829	0.0965398	0.0536619	2.54853	5.09935	22.5822	1.20048	8.42905	Yes
NM_000078	CETP	0.0108018	0.0277092	0.0295696	0.024709	0	0.0292815	0.0437646	0.0166812	0	0.0490981	0.0859256	0	0.0183324	Yes
NM_000079	CHRNA1	0	6.17401	0	0	0	0.00424998	0	0.0387383	0.111501	0.128272	0.0280607	0	0	Yes
NM_000080	CHRNE	1.14725	1.78715	3.46484	3.75201	2.17276	3.28616	3.60505	7.73387	4.83584	2.27174	2.14599	4.52549	3.21299	Yes
NM_000081	LYST	1.12215	1.43498	0.615234	0.576365	1.65756	3.0813	1.21819	0.119659	0.522266	0.939192	0.400367	0.269201	0.367508	Yes
NM_000082	ERCC8	3.865	7.2604	6.14202	4.39037	4.76712	7.51752	8.13774	1.70601	2.78574	3.19352	8.69119	3.48763	4.58935	Yes
NM_000083	CLCN1	0.0630793	0.0946664	0.61553	0.012368	0.0125818	0.400345	0.233666	0.0216473	0.0111264	0.122879	0.0896034	0.0145646	0.158035	Yes
NM_000084	CLCN5	0	0	0	0	0	0	0	0	0	0	0	0	0	Yes
NM_000085	CLCNKB	0	0	0.456836	0	0.0112571	0.126279	0	0.00737837	0	0.108585	0	0.0130312	0.0304078	Yes
NM_000086	CLN3	45.7847	20.6634	25.239	23.5287	18.8823	20.3904	36.1542	42.1963	33.5705	24.7271	30.557	29.0962	88.1149	Yes
NM_000087	CNGA1	0.0267996	0.397753	1.00874	0.231422	0.070159	0.261836	0.559194	2.4418	1.37737	0.0913604	0.29979	0.292377	0.289956	Yes
NM_000088	COL1A1	0.264604	0.148033	3.28802	0.0802261	0.526294	1.93328	0.0850042	0.770505	0.122951	1.50874	0.049819	0.297976	0.159435	Yes
NM_000089	COL1A2	0	0	0	0	0	0	0	0	0	0.072684	0.0102216	0	0	Yes
NM_000090	COL3A1	10.8479	0.00371414	0.00264233	0	0	0	0	0.027825	0	0.0153559	0	0	0.00286682	Yes
NM_000091	COL4A3	0.0183773	0.00926004	0.100614	0.00840755	0.0156357	0.00934068	0.00465358	0.00709497	0.0051054	0.0104414	0.0205574	0.0111384	0.00779729	Yes
NM_000092	COL4A4	0.0252261	0.0581077	0.222669	0.011953	0.00660395	0.00691967	0.00730042	0.0055652	0.0093441	0.0109201	0.132583	0.0294867	0.00305805	Yes
NM_000093	COL5A1	3.63429	0	0	0.516628	0.0057627	0.0114371	0.0428095	0.0215295	0.0285383	0.0183435	0.0284545	0.00667089	0.0130756	Yes
NM_000094	COL7A1	0.52609	1.22767	0.623514	0.232846	0.520297	0.180314	0.0955503	0.148376	2.43328	3.46169	0.310661	1.0812	0.417352	Yes
NM_000095	COMP	0	0	0.0622146	0	0	0.0102681	0	0	0	0	0	0.0045916	0	Yes
NM_000096	CP	1.01376	1.12844	1.01809	1.37399	1.15789	3.33167	0.785823	1.99887	1.40724	1.03307	0.759496	1.2628	1.40831	Yes
NM_000097	CPOX	12.0305	106.631	16.7085	26.867	19.1766	63.6661	11.0136	7.81252	5.42771	11.795	15.3514	97.2292	12.0717	Yes
NM_000098	CPT2	6.412	12.456	12.2317	13.5868	11.8949	9.85476	14.3832	8.10009	7.96547	5.03365	13.3821	4.67526	8.88311	Yes
NM_000099	CST3	148.638	151.775	184.558	495.08	60.5583	86.4009	234.922	303.997	213.822	913.811	322.03	156.581	222.656	Yes
NM_000100	CSTB	82.2032	116.831	221.007	88.3296	142.736	303.123	268.511	431.644	397.135	150.143	156.331	250.92	364.85	Yes
NM_000101	CYBA	0.795716	242.384	130.61	301.509	163.09	263.534	616.916	575.739	278.119	173.035	262.093	541.037	266.795	Yes
NM_000102	CYP17A1	0	0.0182641	0.0116942	0.111726	0	0.0337758	0	0.00513107	0	0.037756	0.178405	0.0906218	0	Yes
NM_000103	CYP19A1	0	0.108766	0.00663246	0.00678924	0.0244198	0.0124515	0	0.0283737	0.0157055	0.00642409	0	0.0205587	0.0251858	Yes
NM_000104	CYP1B1	0.306789	15.9393	1.67397	0.0224236	1.0132	1.06785	0.0176518	0.912033	0.228623	0.115518	0.0830321	0.0220051	0.782544	Yes
NM_000106	CYP2D6	0.583583	0.645696	0.162387	0.421019	0.141025	0.248451	0.636581	0.883891	0.178754	0.977719	0.959695	0.564571	0.428553	Yes
NM_000107	DDB2	10.2867	9.31529	11.6152	12.625	17.7297	11.1499	35.7218	8.71299	12.5394	13.9675	10.4789	20.7987	19.6126	Yes
NM_000108	DLD	33.3623	42.3419	43.4997	29.4406	75.3299	42.8982	51.495	19.1892	38.769	26.3297	48.9663	21.9749	40.4089	Yes
NM_000109	DMD	0	0	0	0	0	0	0	0	0	0	0	0	0	Yes
NM_000110	DPYD	0.770558	0.0230202	5.75165	0.00766366	0	0.0605456	0.00509021	0	0	0.00951756	0	0	0	Yes
NM_000111	SLC26A3	0.0032109	0.00941339	0.0050227	1.95374	0.00336233	0.00290136	0.0208148	0.145451	0	0.583787	2.51587	0.00389223	2.73015	Yes
NM_000112	SLC26A2	3.66836	5.00106	3.44914	0.804677	2.696	3.72618	1.08161	0.341166	0.445499	3.03531	1.47471	0.89469	4.65853	Yes
NM_000113	TOR1A	19.6285	43.2496	23.0784	21.2825	27.1007	28.7518	21.2802	16.9945	11.9464	28.9468	14.2578	16.6237	25.9006	Yes
NM_000114	EDN3	0	0.0114143	0.0091355	0.110436	0	0.0650845	0.0252393	0	0	0.123879	0.108399	0	0.0396465	Yes
NM_000115	EDNRB	0	0	0	0.0019963	0	0.00591431	0.00176793	0	0	0	0	0	0	Yes
NM_000116	TAZ	0	0	0	0	0	0	0	0	0	0	0	0	0	Yes
NM_000117	EMD	0	0	0	0	0	0	0	0	0	0	0	0	0	Yes
NM_000118	ENG	0.332403	0.166692	0.244019	0.0693668	0.10992	21.1766	4.3758	0.150096	9.45917	0.384349	0.307328	20.5109	0.118767	Yes
NM_000119	EPB42	0	0.00268704	0	0	0	0.00496913	0	0	0	0	0	0	0	Yes
NM_000120	EPHX1	6.75531	109.604	63.9556	10.789	12.4752	47.325	32.918	6.41013	31.5082	33.9886	13.8186	157.966	16.9555	Yes
NM_000121	EPOR	0.852278	3.31656	5.39553	0.248287	3.42182	9.09808	0.616291	1.27092	0.470005	1.77771	0.691645	1.99212	0.58377	Yes
NM_000122	ERCC3	93.943	24.6613	13.2326	10.7028	47.7547	28.3837	13.6986	10.3088	15.3676	36.3069	17.8664	18.5883	13.7938	Yes
NM_000123	ERCC5	10.7934	13.8321	3.65493	39.1026	18.4573	13.1545	30.7354	16.3956	19.3915	8.63668	31.1392	12.6243	9.52327	Yes
NM_000124	ERCC6	0.819163	3.46661	1.71998	3.0359	3.92216	3.43197	1.36966	0.416876	0.64337	2.43181	1.45953	0.634541	1.17776	Yes
NM_000125	ESR1	0	0	0.076244	0	0	0.0153481	0	0.00304123	0.00984786	0	0	0	0	Yes
NM_000126	ETFA	151.798	109.851	162.441	200.445	107.978	99.6755	153.021	73.1458	148.781	60.3478	83.4615	43.091	259.265	Yes
NM_000127	EXT1	7.77022	19.1121	15.3138	21.385	10.0801	20.913	12.6894	18.1442	46.1766	13.639	21.2782	10.5489	21.3228	Yes
NM_000128	F11	0	0.00208321	0.00666922	0.516241	0.00297638	0.00256832	0	0	0	0	0.0282624	0	0	Yes
NM_000129	F13A1	0	0	0	0.352238	0.00505477	0.00218088	0	0.429875	0.00178803	0.0987343	0.023999	0	0	Yes
NM_000130	F5	0	0.00298132	0.00715832	4.74452	0.0298168	0.00551334	0.0148326	0.020939	0.0165741	0.00770381	0.101117	0.00369812	0.0120812	Yes
NM_000131	F7	0	0	0	0.245939	0	0.00944516	0	0.00614942	0	0	0.386052	0.0398227	0.0506861	Yes
NM_000132	F8	0	0	0	0	0	0	0	0	0	0	0	0	0	Yes
NM_000133	F9	0	0	0	0	0	0	0	0	0	0	0	0	0	Yes
NM_000134	FABP2	0.0623154	0.0152242	0	1.85879	0	0.00187693	0.114456	4.1145	0	0	1.50363	0.0201435	0.366632	Yes
NM_000135	FANCA	22.6961	11.5846	5.43822	15.1946	14.8968	7.02816	7.9207	9.33146	5.61347	9.61475	9.88352	13.1293	6.16292	Yes
NM_000136	FANCC	15.089	8.16888	3.31627	10.7977	4.88039	5.22281	5.95459	3.21693	1.89943	3.73999	4.4726	3.62762	2.5205	Yes
NM_000137	FAH	12.0008	6.63652	11.5165	10.9854	14.2553	10.2111	9.51087	9.04021	14.113	8.41787	9.055	14.1463	17.7621	Yes
NM_000138	FBN1	0.627115	0.125989	0.0896321	0.280714	0.0208341	0.0262476	0.115433	0.0114706	0.0259413	0.0578774	0.0158266	0.119623	0.031065	Yes
NM_000139	MS4A2	0	0.00187688	0	0.00234313	0	0	0.00415015	0	0	0	0	0	0	Yes
NM_000140	FECH	6.32824	6.07315	2.58249	1.34864	8.08657	4.27351	1.8828	0.983362	0.649436	1.0493	1.23903	3.29562	0.869515	Yes
NM_000141	FGFR2	0.196921	3.33869	2.59316	0.0772206	2.5229	3.60504	2.5124	0.606138	0.407882	1.51006	0.147854	1.3007	0.25236	Yes
NM_000142	FGFR3	0.21959	3.10573	2.0984	6.31717	4.27565	7.84059	1.63844	4.2305	0.690983	3.14918	9.06684	4.60159	9.98487	Yes
NM_000143	FH	121.049	64.7626	52.9445	65.2394	52.3271	32.7958	84.3942	19.991	43.8315	32.2835	45.9638	48.3755	56.7697	Yes
NM_000144	FXN	6.03759	2.14895	2.85863	3.60331	2.97466	1.94193	3.25242	2.93934	3.57285	1.63104	2.3692	1.75732	1.94217	Yes
NM_000145	FSHR	0	0	0	0.0030762	0	0	0	0	0	0	0	0	0	Yes
NM_000146	FTL	299.598	763.413	1053.95	1148.64	1744.73	404.165	379.94	810.791	524.027	2044.33	730.696	298.026	925.852	Yes
NM_000147	FUCA1	5.48813	113.87	28.9723	9.8679	9.04017	15.2115	22.2643	32.7946	9.7598	30.5779	20.567	11.6128	19.7871	Yes
NM_000148	FUT1	0.0088092	4.55343	3.32096	3.82867	4.61925	5.1491	1.83453	2.71626	3.84714	5.23869	3.35483	4.55702	0.979265	Yes
NM_000149	FUT3	0.0758022	9.03733	8.49786	39.9836	0.0755974	0.273979	38.6591	27.0169	4.2572	0.968017	19.7406	0.140018	21.7722	Yes
NM_000150	FUT6	0.0238466	0.640122	0.694756	8.36231	0	0.0323215	4.33809	7.08901	0.25616	0.112907	4.76011	0.0541999	2.76217	Yes
NM_000151	G6PC	0	0	0	0.122897	0	0	0	0.00310743	0	0	0.0360147	0	0	Yes
NM_000152	GAA	75.4356	43.2515	47.1604	3.95823	24.4862	97.1438	2.716	15.5956	31.1253	10.4369	16.328	53.5452	26.8727	Yes
NM_000153	GALC	0.0311992	33.3344	22.4254	1.12212	0.0150788	0.0151801	1.90194	7.36301	0.00711179	1.78174	0.0238636	0	2.89189	Yes
NM_000154	GALK1	30.4654	12.327	23.8975	15.1014	10.0017	20.0471	9.01376	16.865	36.0172	9.57151	19.0895	17.4456	20.0854	Yes
NM_000155	GALT	9.95128	14.0974	18.5219	9.87582	12.5047	19.9143	18.3943	9.37823	12.1512	12.8948	12.3583	8.0391	10.6648	Yes
NM_000156	GAMT	57.2494	3.60408	57.684	0	0.0184233	0.00397437	0.0071282	7.6256	28.531	1.06625	0.384868	0.0746437	7.86786	Yes
NM_000157	GBA	40.5897	32.9956	27.5454	12.705	24.8115	23.1249	32.751	84.0016	42.8749	38.4137	14.6996	26.6664	37.8723	Yes
NM_000158	GBE1	5.01792	15.8914	14.0043	35.4979	11.6671	19.5553	9.03555	1.8932	4.67237	8.79551	11.933	3.22346	9.42393	Yes
NM_000159	GCDH	15.5146	9.87108	12.2063	13.2385	8.60411	15.2018	11.7777	8.49074	10.0683	19.6557	11.8746	7.93714	10.8527	Yes
NM_000160	GCGR	0	0	0.109897	0.00622092	0	0.00409562	0	0.0279985	0	0	0	0	0.0230775	Yes
NM_000161	GCH1	0.951625	12.6457	3.11705	8.15069	15.4592	14.6339	6.05769	4.83287	11.9281	7.29621	13.9332	6.06583	8.36796	Yes
NM_000162	GCK	0.0102367	0	0.114759	0.00312218	0	0.0246663	0	0	0.0101115	0.0155098	0.149289	0	0	Yes
NM_000163	GHR	0.00614024	0.00150011	0.0640331	0	0.00428655	0.00277415	0	0.0379293	0	0.00620213	0.0162813	0	0	Yes
NM_000164	GIPR	0.0137779	0.949226	0.477741	0.102955	0.673292	2.10399	0.487516	0.184401	0.0952658	0.835005	1.07773	0.228253	0.350749	Yes
NM_000165	GJA1	21.436	0	0.0046747	0	0	0.00270034	0	0.0123067	0	0.00452783	0	0	0.00507185	Yes
NM_000166	GJB1	0	0	0	0	0	0	0	0	0	0	0	0	0	Yes
NM_000167	GK	0	0	0	0	0	0	0	0	0	0	0	0	0	Yes
NM_000168	GLI3	3.80806	0.0625229	0	0	0.00357317	0.00102776	0	0.174479	0	1.58028	0	0	0	Yes
NM_000169	GLA	0	0	0	0	0	0	0	0	0	0	0	0	0	Yes
NM_000170	GLDC	22.3228	0.0483099	0.00954692	0.0156361	1.38045	0.488609	0.0019782	0.12064	2.16303	0	0.0631135	0.0266334	0.0124296	Yes
NM_000171	GLRA1	0	0.00759691	0	0.0118551	0	0	0.00839912	0	0	0	0.0206131	0	0	Yes
NM_000172	GNAT1	0.015133	0.0305013	0.0650981	0	0.0515019	0.0170927	0.00613129	0	0.0140137	0.0630529	0.0300948	0.00458603	0.0128416	Yes
NM_000173	GP1BA	0.493604	0.249405	0.359741	1.01791	0.313263	1.07281	0.109085	0.0577476	0.0387838	0.181301	0.758526	0.253842	0.101542	Yes
NM_000174	GP9	0	0	0	0	0	0	0	0	0.0161068	0	0	0	0	Yes
NM_000175	GPI	158.685	160.155	227.896	271.187	159.665	289.4	155.115	108.148	143.819	115.507	140.429	141.335	215.353	Yes
NM_000176	NR3C1	4.38296	0.00201973	3.40327	0.00567328	0	0	0.0011165	0.0354635	0.00204151	0.173272	0	0	0.0935376	Yes
NM_000177	GSN	2.94907	43.6354	80.9795	11.3011	75.5347	134.56	55.728	39.1121	90.2875	40.5275	18.7882	153.471	18.3697	Yes
NM_000178	GSS	60.1413	47.0949	33.6525	111.703	43.7493	86.0778	62.1422	60.678	30.7263	74.5457	105.104	37.9816	44.3419	Yes
NM_000179	MSH6	60.8191	4.75203	15.6419	22.1043	30.8767	23.7523	19.5502	27.4424	18.8615	27.8851	17.1419	11.7486	23.5859	Yes
NM_000180	GUCY2D	0	0.00941533	0.0783702	0.0117542	0.0807126	1.31168	0	0.00529023	0.00190337	0.00778544	0	0.302099	0	Yes
NM_000181	GUSB	32.6458	52.2192	28.5788	17.4749	24.7024	36.466	41.422	40.5761	41.3248	31.3643	28.9035	68.2764	93.3709	Yes
NM_000182	HADHA	130.905	72.5114	59.3621	61.1858	72.0102	69.541	66.059	51.1312	46.3219	49.3256	68.4144	29.3611	79.3628	Yes
NM_000183	HADHB	67.7692	44.4282	51.8419	31.4005	51.523	48.3637	46.0295	38.2517	33.5248	45.529	39.0177	31.7828	46.6965	Yes
NM_000184	HBG2	0	0	0.0624623	0	0	0.180407	0	0	0.177491	0.483999	0	0	0	Yes
NM_000185	SERPIND1	0.130347	0.268114	0.397929	0.265465	0	0.0208967	0.143102	0.190472	2.18985	0.0700777	0.0167238	0.0305818	0.0142723	Yes
NM_000186	CFH	0.00451182	0.00661365	0.375822	0.00309622	0.0165361	0.00407687	0.00365602	0.139351	0	0	0	0	0.00765728	Yes
NM_000187	HGD	0.0184976	2.86399	0.0397858	5.65301	0.145275	0.0438752	11.1443	7.52229	6.80723	1.74462	6.87895	0.0728735	2.95097	Yes
NM_000188	HK1	32.5562	36.2127	49.8281	15.5794	52.887	63.8376	0.792182	1.00915	9.80798	21.0033	7.65838	24.9521	3.19983	Yes
NM_000189	HK2	22.921	16.8051	7.60883	21.1767	10.3167	23.7055	10.461	11.761	8.64725	2.25551	8.09094	6.77145	12.7196	Yes
NM_000190	HMBS	44.7278	46.5697	53.335	48.1965	30.4075	43.8172	61.3824	55.8998	63.2801	31.5748	39.9527	40.3921	47.4152	Yes
NM_000191	HMGCL	10.8184	23.4309	14.3243	33.5574	12.2561	33.1264	29.6904	21.1912	8.15183	12.3044	28.3981	17.9414	17.4274	Yes
NM_000192	TBX5	0	0	0.0649021	0	0	0	0.0217545	0	0	0	0.0485362	0	0	Yes
NM_000193	SHH	0.00592766	0.152058	0.0324535	2.41358	2.01735	6.79704	0.951053	0.219697	0.808014	18.052	0.766235	2.0263	3.95365	Yes
NM_000194	HPRT1	0	0	0	0	0	0	0	0	0	0	0	0	0	Yes
NM_000195	HPS1	9.92361	5.54311	9.14729	17.0492	11.2419	14.3562	21.2871	3.88026	10.7844	10.7944	11.5619	10.1429	15.9956	Yes
NM_000196	HSD11B2	6.60194	2.00674	4.10837	27.4987	2.08802	5.07582	10.1246	7.41478	10.2448	17.2849	11.1465	39.9419	13.6458	Yes
NM_000197	HSD17B3	0.245234	0.0359476	0.115083	0.130893	0.05992	0.0221593	0.145727	0.370297	0.0121118	0.371559	0.130052	0.941358	0.0693669	Yes
NM_000198	HSD3B2	0.0600686	0.0280164	0.0085421	0.0899384	0	0	0.0840745	0.011244	0.008091	0	0.0977378	0.013239	0	Yes
NM_000199	SGSH	5.63744	12.7068	6.65076	1.65205	6.51766	7.41399	5.55443	8.84124	7.53847	1.37929	7.4897	11.2191	8.36596	Yes
NM_000200	HTN3	0	0	0	0	0	0	0	0	0	0	0	0	0	Yes
NM_000201	ICAM1	0.146741	18.4712	18.2441	0.866155	36.1316	11.9907	1.99577	0.109603	1.17023	15.8552	3.23864	4.79225	1.44054	Yes
NM_000202	IDS	0	0	0	0	0	0	0	0	0	0	0	0	0	Yes
NM_000203	IDUA	0.187195	3.36764	5.35401	2.78918	0.592527	1.93561	4.91608	9.88581	5.38015	6.36863	3.33353	8.74146	6.47676	Yes
NM_000204	CFI	0	0	0.717242	0	0.00901675	0	0.0139548	0.0354596	0.00637902	0.0521846	0.0256858	0.0156566	0.0146136	Yes
NM_000206	IL2RG	0	0	0	0	0	0	0	0	0	0	0	0	0	Yes
NM_000207	INS	0	0.0293163	0	0	0	0	0	0.0617702	0	0	0	0.0242433	0.0678847	Yes
NM_000208	INSR	3.27144	2.57373	5.29716	3.60588	7.34794	8.93943	2.81127	1.55032	1.78447	4.43659	4.2327	2.77868	4.96265	Yes
NM_000209	PDX1	26.171	2.93582	0.0113718	21.55	2.41319	0.913078	5.95266	7.08771	7.87917	1.16754	9.48391	1.87262	1.41269	Yes
NM_000210	ITGA6	8.16013	103.316	75.2755	143.965	125.419	241.009	70.4677	24.8598	35.5658	91.3223	102.056	8.71352	59.9363	Yes
NM_000211	ITGB2	0	0.465945	0.748304	0.0979088	0.138416	0.315662	0.0382536	0.048602	1.08883	0.152588	0.0375527	0.00763002	0.0961434	Yes
NM_000212	ITGB3	0.00571997	0.254333	0.0372814	0.0113398	0	0.0663297	0	0.0117777	0	0.0317769	0.0227504	0.00462247	0	Yes
NM_000213	ITGB4	0.582728	73.1508	82.5915	43.6851	146.498	38.3346	164.388	19.4243	392.908	245.575	33.0822	161.644	62.0793	Yes
NM_000214	JAG1	8.25771	42.0123	8.62691	7.66542	2.08151	9.26833	8.35761	10.6858	31.8378	27.1525	5.43271	2.99637	21.8739	Yes
NM_000215	JAK3	0.013719	0.188531	1.00058	0.0211828	0.474078	4.1621	0.00694797	0.148303	0.0609805	0.101331	0.0272827	0.359625	0.0611186	Yes
NM_000216	KAL1	0	0	0	0	0	0	0	0	0	0	0	0	0	Yes
NM_000217	KCNA1	0	0	0	0	0	0	0	0	0	0	0	0	0	Yes
NM_000218	KCNQ1	0.0315627	4.30486	5.14595	84.67	0.805249	3.28368	32.3209	10.289	21.9839	2.37367	166.792	7.93722	18.4708	Yes
NM_000219	KCNE1	0	0	0.0374398	0	0.0294862	0.0152662	0.00912684	0	0	0.0170652	0	0	0.00955778	Yes
NM_000220	KCNJ1	0	0.017635	0	0	0.0335945	0.0253651	0.00649906	0.0082572	0	0	0	0.209028	0	Yes
NM_000221	KHK	20.2686	8.1567	11.7045	45.7649	4.47789	6.71396	16.0609	12.6626	27.7274	18.6644	26.311	13.4296	12.8562	Yes
NM_000222	KIT	2.60964	23.8444	0.0084517	0	0.00754374	0.0170874	0.0204313	0.126084	0.241496	3.26355	0.0143264	0	0.699956	Yes
NM_000223	KRT12	0	0.12005	0	0.167001	0	0.00845746	0.193402	0.192723	2.93308	0.418345	0.362966	0	0.119138	Yes
NM_000224	KRT18	3.40355	954.002	765.964	560.559	785.739	603.395	967.089	563.231	1714.34	2042.58	347.193	617.817	1406.7	Yes
NM_000226	KRT9	0	0.654045	1.32261	0.65247	0.938731	1.03095	1.26462	1.68224	4.27752	1.85213	0.170172	0.716216	1.27938	Yes
NM_000227	LAMA3	0.379025	10.4835	20.4808	0.779177	16.9125	15.9742	7.15925	1.98176	39.4459	17.7271	0.513479	14.6844	15.0058	Yes
NM_000228	LAMB3	0.116883	73.3436	79.5638	16.8882	314.503	1.98079	40.3586	39.6559	22.9633	55.558	18.9919	95.6007	25.8384	Yes
NM_000229	LCAT	2.07842	1.21059	1.00658	0.173172	2.29175	2.92902	2.62108	1.2116	2.64103	4.28563	1.40971	5.06392	1.10962	Yes
NM_000230	LEP	0	0	0	0.00249683	0	0	0	0.00280937	0	0.00413445	0	0	0.0046312	Yes
NM_000231	SGCG	0.022513	0.0165003	0	0	0.0117874	0.00508567	0	0	0	0	0	0	0	Yes
NM_000232	SGCB	5.74911	10.8127	14.783	9.67038	12.8388	11.5661	2.72932	0.429523	4.98082	1.9526	5.1649	8.26909	3.44021	Yes
NM_000233	LHCGR	0	0	0	0	0	0	0	0	0	0.00456868	0	0	0	Yes
NM_000234	LIG1	27.1828	32.794	12.6339	27.7034	25.4466	20.9765	46.4914	20.8892	27.1988	47.7264	17.5965	27.834	29.3344	Yes
NM_000235	LIPA	23.5612	62.3237	32.2656	0.16751	16.5388	55.3156	29.5426	6.14474	8.01372	25.4162	17.7229	13.8365	20.1926	Yes
NM_000236	LIPC	0	0.0808061	0.00907697	0.0345114	0	0	0.0094041	0	0.00429882	0	0.0230795	0.232122	0.0295444	Yes
NM_000237	LPL	0.00498258	0	0.0155881	0	0	0.0213857	0	0	0	0.0075492	0	0	0.0169125	Yes
NM_000238	KCNH2	1.27841	1.07561	1.28557	7.3019	3.18283	8.00463	10.0491	2.71066	9.61578	6.944	13.9527	2.1453	0.501827	Yes
NM_000239	LYZ	0.203206	0.0451316	69.584	1182.93	0.0773779	0.0945901	565.118	402.087	24.2507	42.7954	299.52	0.947975	15.9477	Yes
NM_000240	MAOA	0	0	0	0	0	0	0	0	0	0	0	0	0	Yes
NM_000242	MBL2	0.0104783	0	0.00409772	0.0023969	0	0.0118352	0	0	0	0	0	0	0	Yes
NM_000243	MEFV	0.00533472	0.0156398	0.0166898	0	0.0614496	0.0530249	0	0	0.00395212	0.101034	0.0106091	0	0.0135808	Yes
NM_000244	MEN1	32.6014	28.4144	30.3457	13.3991	24.9952	29.3296	20.0764	23.0777	30.0315	29.7357	30.9181	30.2244	19.617	Yes
NM_000245	MET	13.8502	40.1016	201.101	20.8347	187.192	207.962	30.3331	14.2809	27.4948	128.064	22.3123	3.9146	42.93	Yes
NM_000246	CIITA	0.00600756	0.00880617	0.0626494	0.000916146	0.0167757	0.277754	0	0	0.00445057	3.00371	0.0159295	0.00242744	0.0101958	Yes
NM_000247	MICA	0.285899	20.7796	19.9918	6.02915	18.8112	3.87813	11.6166	24.8297	8.0283	8.60152	7.18824	13.8296	8.23711	Yes
NM_000248	MITF	7.25638	5.17754	1.99147	0.0391798	2.98783	0.489782	0.482383	0.442992	0.00618968	1.17728	0.0498468	0.939368	0.0106349	Yes
NM_000249	MLH1	23.9737	35.843	0.0245749	20.4377	0.0146232	0.0189276	17.1123	6.25397	14.5973	22.5121	18.3151	0.0126958	28.9557	Yes
NM_000250	MPO	0	0.00425163	0.136112	0	0.0334097	0.0956608	0.0423053	0.0059722	0	0	0	0.0914137	0.0984507	Yes
NM_000251	MSH2	55.6523	73.342	35.1462	34.728	55.7779	29.9142	26.1051	26.8385	21.3701	32.9563	36.3322	28.4095	31.1117	Yes
NM_000252	MTM1	0	0	0	0	0	0	0	0	0	0	0	0	0	Yes
NM_000253	MTTP	0.0387238	0.0217036	0.0231608	97.7643	0.047706	0.0432238	0.125515	0.257965	0.0776256	0.113891	36.0585	0.0331346	0	Yes
NM_000254	MTR	7.21315	8.61015	4.21706	4.43005	6.62791	6.68428	4.36474	1.27924	1.86919	3.5791	3.82607	2.80245	2.1988	Yes
NM_000255	MUT	9.0333	14.7106	8.22556	5.31332	8.88871	8.9607	8.49672	5.84496	4.22015	8.25629	7.11318	6.07013	9.7005	Yes
NM_000256	MYBPC3	0.00440356	0	0.0878263	0.00302193	0	0.0109424	0.0499561	0.0317351	0	0.0600473	0	0.00533796	0.00747355	Yes
NM_000257	MYH7	0.00925183	0.0022603	0.0132663	0.00282179	0	0.00557329	0.00249898	0	0.00342701	0.128495	0.00613299	0.0056075	0	Yes
NM_000258	MYL3	0	0	0.0156423	0	0	0.0135536	0	1.31776	0	0.333318	0	0	0	Yes
NM_000259	MYO5A	3.86035	8.36948	1.70869	0.0017455	7.73805	5.95801	0.0364813	0.395942	0.586218	2.69033	0.150232	1.90732	0.578885	Yes
NM_000260	MYO7A	0.017439	1.44522	0.859296	0.162415	1.61875	1.34786	0.265464	0.00384728	0.206709	0.16042	3.59441	0.0211394	0.205064	Yes
NM_000261	MYOC	0.0091404	0	0	0	0	0.00412962	0	0	0	0.0138488	0	0	0	Yes
NM_000262	NAGA	11.0739	20.6094	15.1704	4.23048	10.6226	10.5882	9.53788	6.566	4.14183	5.00423	3.47853	12.9528	6.16262	Yes
NM_000263	NAGLU	11.8071	24.699	5.41691	8.90203	4.02173	7.53527	15.8299	27.0732	10.9407	9.1964	11.984	11.5371	10.8654	Yes
NM_000264	PTCH1	10.3043	6.33132	1.09804	8.80493	0.54622	3.69264	2.38851	1.77314	0.785916	31.3723	5.11191	5.12678	1.75858	Yes
NM_000265	NCF1	0.0132857	0.0292122	0.0363691	0	0.0139123	0.0480197	0	0.335111	0	0	0.0132105	0.104681	0	Yes
NM_000266	NDP	0	0	0	0	0	0	0	0	0	0	0	0	0	Yes
NM_000267	NF1	14.7153	19.4416	7.28344	5.61955	16.4874	8.58413	4.40383	2.72736	4.62359	9.79858	9.18166	3.87727	4.25809	Yes
NM_000268	NF2	8.35025	10.0909	9.10198	2.58553	20.9449	19.9474	4.35115	5.32579	14.1444	16.7265	3.30088	11.5485	5.43165	Yes
NM_000269	NME1	596.238	193.543	323.155	217.032	250.832	144.523	308.888	346.842	354.211	236.04	231.416	261.997	241.779	Yes
NM_000270	PNP	53.2855	38.3392	61.3065	62.3714	63.7179	40.4125	48.4752	40.8752	83.245	31.5994	43.0483	20.8638	40.6845	No
NM_000271	NPC1	8.16635	20.3022	17.9482	9.78973	18.3243	19.541	9.76146	4.46461	24.8873	17.1997	10.0434	9.72802	11.739	Yes
NM_000272	NPHP1	2.85862	1.39429	2.69566	0.219514	1.47549	1.25488	0.468207	0.626176	1.18654	1.99663	0.981079	1.5278	0.166305	Yes
NM_000273	GPR143	0	0	0	0	0	0	0	0	0	0	0	0	0	Yes
NM_000274	OAT	65.3893	51.9788	48.9281	19.086	74.7354	82.9733	16.4425	12.9047	21.0626	43.8928	54.6189	24.4027	93.8819	Yes
NM_000275	OCA2	1.01827	0	0	0	0	0.00133736	0	0	0.144732	0	0.0117733	0	0.0602847	Yes
NM_000276	OCRL	0	0	0	0	0	0	0	0	0	0	0	0	0	Yes
NM_000277	PAH	0	2.08296	0.182063	0.0238423	0.00363816	0.0753449	0.0534906	0	0	0.442175	0.262553	0	0.312512	Yes
NM_000278	PAX2	0	0.013494	0.0557998	0.0231634	2.07736	4.52195	0	0.0047387	0.00681976	0.062764	0.0274605	0.0251076	0.0195292	Yes
NM_000280	PAX6	0.1601	0.308636	0.475622	1.79174	0.100027	0.136764	0.510206	0.081721	0.0328909	3.17787	0.441462	0.166347	1.31976	Yes
NM_000281	PCBD1	48.4947	90.4095	166.387	140.621	82.0681	116.123	175.41	72.5096	196.246	130.958	129.153	247.62	118.194	Yes
NM_000282	PCCA	6.7739	24.3493	4.59941	23.4372	4.60899	14.7564	131.411	16.0553	71.6896	4.26312	39.5072	8.11921	8.11438	Yes
NM_000283	PDE6B	0.0109311	0.00400584	0.00427479	0.435083	0.0143083	0.0234587	0.0177154	0.0422021	0.00404905	0	1.97821	0	0.0231898	Yes
NM_000284	PDHA1	0	0	0	0	0	0	0	0	0	0	0	0	0	Yes
NM_000285	PEPD	44.6542	13.1915	48.305	49.9004	26.364	32.9382	39.2105	15.77	20.8499	30.5123	51.8883	20.176	43.7956	Yes
NM_000286	PEX12	4.06659	4.163	1.1992	2.71814	6.22519	2.8307	1.61515	1.96956	0.980982	3.04636	1.5315	2.89771	1.44893	Yes
NM_000287	PEX6	4.64394	10.4608	4.05287	11.2649	10.4593	11.2353	9.0344	13.4221	12.6548	6.16467	8.35627	4.5577	19.7715	Yes
NM_000288	PEX7	3.7828	8.40029	5.09791	10.4296	8.17862	20.8404	11.0411	13.1948	6.18575	6.43475	8.88264	3.71858	11.4453	Yes
NM_000289	PFKM	112.531	44.3925	51.438	47.3982	54.044	63.6289	24.4724	11.3841	32.8249	18.1032	39.0617	33.5448	39.4019	Yes
NM_000290	PGAM2	1.68694	0.311093	1.53221	0.572602	1.02571	1.76033	0.679069	2.17374	0.282197	2.20962	0.930681	1.74146	0.720367	Yes
NM_000291	PGK1	0	0	0	0	0	0	0	0	0	0	0	0	0	Yes
NM_000292	PHKA2	0	0	0	0	0	0	0	0	0	0	0	0	0	Yes
NM_000293	PHKB	11.5209	3.2685	6.25471	8.51373	20.1864	10.6147	13.9601	4.32248	6.95283	7.8225	14.1035	4.67436	12.1885	Yes
NM_000294	PHKG2	5.95159	2.23075	4.8963	4.28052	4.70884	5.47897	3.78808	7.36851	5.76702	7.27299	4.14423	11.7939	8.31662	Yes
NM_000295	SERPINA1	0.00870677	4.02667	13.7468	1.39815	3.24883	0.264869	1.25349	0.0567711	0.00430015	7.57209	21.3148	2.42045	2.49727	Yes
NM_000296	PKD1	6.80087	5.68838	4.08643	3.57911	6.24593	4.23112	2.79555	2.45711	2.24532	8.2781	4.37744	10.9954	2.86314	Yes
NM_000297	PKD2	2.6422	11.0778	2.22894	0.970905	5.18536	4.44374	1.52611	1.26931	0.801751	1.971	1.2716	4.40336	1.04466	Yes
NM_000298	PKLR	1.99822	0.451494	0.100676	7.20969	0.186139	0.12185	0.360098	1.78903	0.433658	0.701165	3.76661	0.397513	0.566951	Yes
NM_000299	PKP1	0.00342723	0.218536	5.37182	0.653835	0	0.962342	0.665128	0.0441054	0.393544	3.05329	1.1314	0.0062317	0.28792	Yes
NM_000300	PLA2G2A	0.120951	0.238668	0.087323	3.50312	0.204598	0.0546456	2.05819	8.17061	84.9104	0.126869	0.814115	0.0563909	6.06347	Yes
NM_000301	PLG	0	0.0115748	0.119402	0.154135	0.126787	0.0118918	0.0341256	0.0514867	0.0584982	0.0199398	0.0418754	0.0191437	0.084875	Yes
NM_000302	PLOD1	43.6012	99.0158	97.1141	33.6065	38.6457	58.1998	24.2602	28.7094	21.8728	43.9802	25.1681	88.2893	42.6917	Yes
NM_000303	PMM2	25.8106	23.6289	21.3745	39.8117	17.0375	10.8195	33.9785	38.4578	21.5605	22.5098	25.7045	26.0064	34.3392	Yes
NM_000304	PMP22	11.0397	5.10103	6.5378	1.30354	11.6192	17.404	0.868917	3.7693	6.81294	48.315	0.467118	11.5253	1.26526	Yes
NM_000305	PON2	12.7536	116.084	39.068	35.9225	36.4584	128.512	89.1658	19.2317	29.1369	46.5514	32.5151	44.285	59.6429	Yes
NM_000306	POU1F1	0	0.0108202	0.00577333	0	0	0.00333496	0.0119628	0	0.0273422	0	0.0146795	0	0	Yes
NM_000307	POU3F4	0	0	0	0	0	0	0	0	0	0	0	0	0	Yes
NM_000308	CTSA	48.3761	68.2472	64.9016	55.9859	49.1668	61.912	61.3244	83.2127	84.3979	337.6	106.027	116.412	163.126	Yes
NM_000309	PPOX	11.3787	4.46299	5.61812	3.34599	4.5587	9.37451	7.77843	6.36434	7.59917	7.32144	5.24861	7.88932	5.99383	Yes
NM_000310	PPT1	95.5047	120.038	113.561	37.017	47.7307	39.218	75.3974	50.8304	56.6225	15.9926	32.6498	72.2829	57.8131	Yes
NM_000311	PRNP	21.1909	78.2546	58.9357	33.6038	102.884	46.3726	25.6216	17.8525	4.12196	36.2235	25.0422	29.2294	31.7874	Yes
NM_000312	PROC	0.0523185	0.25308	0.18414	0.25611	0.602645	1.57189	0.754625	0.570951	0.441853	1.23659	0.655483	0.53907	1.11879	Yes
NM_000313	PROS1	0.341065	18.0383	6.87463	3.19934	5.13371	13.5908	0.36709	0.420828	0.0135015	1.2978	1.96233	0.018936	0.119303	Yes
NM_000314	PTEN	3.90496	7.49341	9.4182	5.96299	3.44348	9.15921	6.35583	3.27796	6.19766	6.84811	6.63001	7.78036	8.29418	Yes
NM_000315	PTH	0	0	0.0179206	0	0	0	0	0	0	0	0	0	0	Yes
NM_000316	PTH1R	0	0.124786	2.50621	0	1.50858	0.307688	0	0.00449447	0.00323414	0.0595292	0.0260452	0.730283	0	Yes
NM_000317	PTS	21.2288	20.2297	26.3619	19.0461	28.5173	27.2798	24.3831	24.849	35.083	51.3539	26.6531	18.9741	31.618	Yes
NM_000318	PEX2	4.95643	5.86928	5.0591	15.2124	10.3759	9.93747	5.8488	3.46488	5.0593	3.39403	13.0673	2.66367	5.1138	Yes
NM_000319	PEX5	36.4259	10.9498	12.1466	28.5462	18.7905	16.4837	17.0489	20.385	6.6555	18.2749	26.4107	6.08411	25.3353	Yes
NM_000320	QDPR	25.2037	14.6746	28.6076	22.6176	24.686	23.5765	27.7379	19.7715	14.9749	20.2039	30.4658	8.81012	24.4495	Yes
NM_000321	RB1	20.4359	24.9999	7.18939	35.4995	24.7103	7.87854	25.6786	9.37311	7.75035	13.1676	36.9596	5.49915	3.43254	Yes
NM_000322	PRPH2	0	0.00905612	0.0072481	0	0	0.00558248	0	0.0413432	0.00915378	0	0	0.0411895	0	Yes
NM_000324	RHAG	0	0.0141589	0.0113322	0	0	0.00436402	0	0	0	0	0	0.0117088	0	Yes
NM_000325	PITX2	6.72999	18.2677	3.28589	9.35328	13.3418	10.3446	4.00988	1.41818	6.92501	0.789543	2.87599	2.14969	4.87452	Yes
NM_000326	RLBP1	0.675009	0.151925	25.5077	0.00729484	0.0333942	0.0144079	0.404846	0.268127	0.0118126	2.58498	0.0105699	0.0128857	0.333757	Yes
NM_000327	ROM1	0.547355	0.342818	0.836749	0.837746	0.599223	0.476604	0.725781	1.86985	0.630363	0.294027	0.65311	0.856518	0.954284	Yes
NM_000328	RPGR	0	0	0	0	0	0	0	0	0	0	0	0	0	Yes
NM_000329	RPE65	0	0.0104653	0.00837595	0.00489939	2.02229	0.117734	3.60418	0.371187	0	0.0324512	0.014198	0	0.0424085	Yes
NM_000330	RS1	0	0	0	0	0	0	0	0	0	0	0	0	0	Yes
NM_000331	SAA1	0	0.846169	0.472989	0.125758	0	0	2.65064	0.3962	0.0509104	18.9291	1.14798	0	3.84879	Yes
NM_000332	ATXN1	0.05979	3.08362	4.15165	0.854805	0.526659	2.04703	0.876357	1.69006	1.10931	3.09335	1.13832	1.85136	2.00409	Yes
NM_000333	ATXN7	3.40226	4.32944	3.57938	3.57391	4.26958	4.57986	1.86729	0.971869	1.09978	5.03336	3.94492	1.37787	2.8399	Yes
NM_000334	SCN4A	0.504512	0.0175246	0.24405	0	0.00751146	1.10566	0	0.00246166	0.00354272	0.00724546	0	0.0304334	0.028406	Yes
NM_000335	SCN5A	1.7778	0.479372	0.611121	0.00150618	0.00459665	0.01537	0.0053355	0.0745675	0.00406495	8.0907	0.0436478	0.00266053	0.00744989	Yes
NM_000336	SCNN1B	3.07689	0.0105134	0.0140241	0.00984384	0	0.0016202	0.0406826	0.0479961	0.0185969	0	0.0285266	0	0.286052	Yes
NM_000337	SGCD	0.00191055	0	0	0	0	0	0	0	0	0	0	0	0	Yes
NM_000338	SLC12A1	0	0	0.00309146	0.00542492	0	0	0	0	0	0.017966	0	0.0167696	0	Yes
NM_000339	SLC12A3	0	0.0036796	0	0.00153122	0	0	0	0	0	0.0152131	0	0	0.00568032	Yes
NM_000340	SLC2A2	0	0.00397682	0.00848763	0.155147	0	0	0.0373724	0	0	0	0.0701383	0	0.00920871	Yes
NM_000341	SLC3A1	4.51117	6.00324	3.46864	25.3928	4.55567	4.96921	4.79478	2.77918	2.56825	2.54409	31.4434	0.555119	10.9491	Yes
NM_000342	SLC4A1	0.0131748	0.00965616	0.00147207	0.000861063	0.00591265	0.0170068	0.00305023	0	0	0.00285163	0	0	0	Yes
NM_000343	SLC5A1	0.00369149	1.24051	2.02828	32.7653	0.0135296	0.221819	21.3398	8.03424	2.12354	1.68351	20.2764	0.011187	2.10192	Yes
NM_000344	SMN1	42.1763	28.8242	52.3581	56.3723	55.6832	43.2843	39.471	14.6401	50.0092	39.4476	64.9596	48.7218	28.9928	Yes
NM_000345	SNCA	0	0	3.63415	0	0	0.00525145	0.0777043	4.23919	3.42071	0	0	0	0	Yes
NM_000346	SOX9	1.52628	84.9007	73.1482	43.6723	23.9068	33.0801	62.7789	31.5274	64.8135	77.9946	60.9044	37.8877	34.203	Yes
NM_000347	SPTB	0.470967	5.16861	1.32826	0.00316862	1.26051	2.78745	0.108878	0.513396	0.0964622	1.02628	0.0275472	1.87054	0.239792	Yes
NM_000348	SRD5A2	0.466078	0.0392001	0	0.0104867	0.024003	0.00345203	0	0	0	0.0115765	0	0.0277857	0	Yes
NM_000349	STAR	0.00692803	0.0812436	0.0270932	0.0206021	0.0399013	0.0297357	0.0364905	0.0784587	0.0230962	0	0.041333	0.0671849	0.00587899	Yes
NM_000350	ABCA4	0.00761473	0.127433	0.0992621	0.0284504	0.0438562	0.508021	0.00308518	0.00653298	0.0150432	0.0615319	0	0	0.0516936	Yes
NM_000351	STS	0	0	0	0	0	0	0	0	0	0	0	0	0	Yes
NM_000352	ABCC8	0.151115	0.00683676	0.0306423	0.0708415	0	0.00590016	0.00453522	0.0153656	0.0041463	0.0282662	0.270838	0	0.0284962	Yes
NM_000353	TAT	0.0405624	0.017342	0.00528753	0.0123715	0.0318566	0.0198532	0.00273904	0.01392	0.0050083	0.0153642	0.0336107	0.102436	0.0286837	Yes
NM_000354	SERPINA7	0	0	0	0	0	0	0	0	0	0	0	0	0	Yes
NM_000355	TCN2	0.0314841	9.62577	3.07106	1.85604	4.78992	5.71621	2.82456	32.2424	3.53197	2.41237	5.90341	0.0872338	4.09148	Yes
NM_000356	TCOF1	63.7961	49.6891	42.3893	42.5081	57.0498	17.5997	46.2895	25.2676	44.1445	58.5542	42.8444	48.3526	42.6924	Yes
NM_000358	TGFBI	1.05803	222.821	332.824	254.252	35.9574	55.0844	492.839	31.4114	397.002	467.672	90.8321	1.30666	191.324	Yes
NM_000359	TGM1	0.439158	0.963153	0.681716	0.618078	0.558163	0.487698	0.475384	0.196727	0.521539	0.599347	0.586676	0.292586	0.409642	Yes
NM_000360	TH	0.127866	0.041235	2.06016	0.182514	0	0.00462157	0.0165779	1.52704	0.0719923	2.60376	0.406855	0.340995	1.52774	Yes
NM_000361	THBD	0	0	0.0181517	0.00106176	0.0048605	0	0	0	0	0	0	0	0	Yes
NM_000362	TIMP3	7.9518	4.68245	1.14788	0.00935801	0.348067	10.449	4.09262	0.0105294	0.0984978	3.89717	1.64407	0	0.0173575	Yes
NM_000363	TNNI3	0.275937	0.161793	11.0845	8.48334	0.335183	1.3514	0.134158	3.8181	0.662327	3.79614	3.62175	0.909808	1.25507	Yes
NM_000364	TNNT2	0	0.13497	0.325637	0.19414	0.0754584	0.329183	0.609867	0.675932	0.0711787	0.752124	0.17515	1.76642	0.163063	Yes
NM_000365	TPI1	370.428	187.539	317.475	335.048	213.909	253.254	239.451	488.456	241.709	160.984	215.359	238.513	455.589	Yes
NM_000366	TPM1	10.5568	67.9183	25.6784	74.1411	14.1581	32.7385	52.8454	23.6449	45.087	37.933	25.9702	7.47357	54.2636	Yes
NM_000367	TPMT	2.60153	8.21895	8.75727	5.38678	4.12397	7.08468	9.03094	8.53817	10.5011	8.36672	5.77388	5.34885	18.1585	Yes
NM_000368	TSC1	7.55911	5.35603	5.8385	3.4667	5.87914	6.38544	3.57228	1.91295	1.95683	4.38452	3.83519	2.23922	2.79491	Yes
NM_000369	TSHR	0.473295	0	0.00166	0	0.00444499	0.0115068	0	0	0.00157233	0	0	0.00514551	0	Yes
NM_000370	TTPA	1.22099	1.57908	0.158238	7.84965	0.903183	0.89161	1.4352	0.48601	1.09387	3.51168	0.0141173	0.821788	0.391554	Yes
NM_000371	TTR	0	0	0	1.41051	0	0	0.0162756	0.186106	0.0074399	0	3.23542	0	0.0852201	Yes
NM_000372	TYR	0	0	0	0	0	0	0.0366397	0.0279309	0	0	0	0	0	Yes
NM_000373	UMPS	8.64908	8.9527	8.54954	10.5956	8.60785	6.32962	9.41668	11.1395	7.69084	11.3588	9.25574	5.25648	10.9308	Yes
NM_000374	UROD	48.0464	46.2059	34.0113	12.7949	84.7203	36.2096	20.0949	34.3245	35.4817	28.5724	22.7223	38.6223	26.5497	Yes
NM_000375	UROS	36.4304	19.026	28.0264	24.2106	15.8587	43.4251	34.7026	13.5288	23.3997	30.9615	29.2987	15.8293	32.7134	Yes
NM_000376	VDR	1.06785	16.4284	7.37867	30.7449	4.80076	2.47394	19.3896	5.53825	11.4709	5.25521	32.2854	1.84191	24.0507	Yes
NM_000377	WAS	0	0	0	0	0	0	0	0	0	0	0	0	0	Yes
NM_000378	WT1	0.0629228	0.00461177	0	1.68836	0	0.00284285	0.00509876	0.0518247	0.00466151	0.00953356	0.118877	0	1.39895	Yes
NM_000379	XDH	0.0748391	1.24012	0.166695	1.05098	0.451472	0.0940862	0.560294	0.0820739	0.0626747	0.342636	1.54979	0.240604	0.016567	Yes
NM_000380	XPA	20.9469	5.51126	7.39006	8.91541	10.5919	9.21434	16.0789	8.85219	3.68089	6.71082	8.78311	9.36128	6.7094	Yes
NM_000381	MID1	0	0	0	0	0	0	0	0	0	0	0	0	0	Yes
NM_000382	ALDH3A2	19.7559	45.7063	34.471	40.592	23.8614	42.6564	54.8644	24.0956	47.4003	3.99227	28.8932	15.8787	29.1425	Yes
NM_000383	AIRE	0	0	0.00644701	0	0.00431581	0	0	0.0127294	0	0	0.0983547	0	0	Yes
NM_000384	APOB	0	0	0	0.00574977	0	0	0	0	0	0	0	0	0	Yes
NM_000386	BLMH	79.4644	20.3647	21.6832	20.1437	16.0841	7.09876	14.3059	12.5168	13.0573	11.9391	11.9685	16.2064	9.40389	Yes
NM_000387	SLC25A20	8.1978	5.05569	2.39912	7.03692	5.19706	5.43885	9.64309	3.45705	3.33751	3.29725	8.92984	2.84691	6.26711	Yes
NM_000388	CASR	0	0.00278749	0	0	0	0	0	0	0	0	0	0	0	Yes
NM_000389	CDKN1A	0.134206	13.5804	36.007	24.3278	109.758	10.7655	105.045	7.6171	37.1459	35.3152	10.5638	39.0755	32.0272	Yes
NM_000390	CHM	0	0	0	0	0	0	0	0	0	0	0	0	0	Yes
NM_000391	TPP1	45.5029	81.1923	45.9611	23.3002	34.3899	56.1899	24.7188	14.5521	15.5223	48.7303	49.7361	24.1187	38.9286	Yes
NM_000392	ABCC2	0.163883	0.632962	0.362933	12.2262	0.111837	0.145589	0.231277	0.555458	0.070936	0.153446	1.58928	0.0848204	10.4129	Yes
NM_000393	COL5A2	1.44739	0.821158	0.0932892	0.107297	0.275062	0.0932452	0.0119457	0.0344937	0.0119141	0.0588852	0.0692947	0.147834	0.0545877	Yes
NM_000394	CRYAA	0.0167588	0	0	0	0	0.0113574	0	0	0	0	0.0333279	0.0304723	0	Yes
NM_000395	CSF2RB	0	0	0.0286196	0	0	0	0.00624231	0	0	0.0583587	0	0	0	Yes
NM_000396	CTSK	0.592065	1.47162	0.954333	0.334463	0.31269	3.71468	1.1848	1.50532	0.266985	0.530429	0.378825	0.636566	0.550471	Yes
NM_000397	CYBB	0	0	0	0	0	0	0	0	0	0	0	0	0	Yes
NM_000398	CYB5R3	55.7532	47.6948	92.9204	14.6732	58.0284	50.3799	37.6168	54.3923	29.3985	48.6522	34.9989	45.5072	36.7707	Yes
NM_000399	EGR2	0	0.543094	3.89727	0.0991153	1.21981	0.794395	0.030531	0.0323252	0.0116303	3.49653	0.162346	0.688896	0.12789	Yes
NM_000400	ERCC2	17.2746	19.7937	20.9305	8.71783	27.8678	24.3115	10.0608	8.59109	12.8109	23.1409	11.1064	13.5835	13.5614	Yes
NM_000401	EXT2	24.0079	49.5507	27.1763	15.7359	38.6539	29.8145	15.9275	11.1112	16.8882	28.4441	21.5433	26.2142	37.6039	Yes
NM_000402	G6PD	0	0	0	0	0	0	0	0	0	0	0	0	0	Yes
NM_000403	GALE	18.0986	44.0243	60.5518	76.9704	18.5107	22.0625	111.573	74.2505	38.4767	50.5447	48.0125	20.2678	39.292	Yes
NM_000404	GLB1	25.822	66.345	40.46	34.0378	32.4637	34.8481	45.3346	9.09587	40.877	41.792	49.4362	30.2077	69.561	Yes
NM_000405	GM2A	5.73958	24.7811	19.162	3.08165	9.66316	13.291	10.6186	2.97541	5.36201	26.5724	8.68669	12.0096	11.2082	Yes
NM_000406	GNRHR	0.0064108	0.0434624	0.0100282	0.0249298	0.0469921	0.0391013	0.0116883	0.0330005	0.00949862	0	0.0254981	0.00388556	0.00544008	Yes
NM_000407	GP1BB	0.233994	0.385876	0.289773	0.0312234	1.05159	2.60331	0.0237013	0.17064	0.0144458	0.0738603	0.0775568	6.29931	0.198563	No
NM_000408	GPD2	8.07803	10.9065	14.3204	6.81967	20.1177	13.7521	10.6442	8.04503	8.99274	15.034	8.08509	6.23632	9.27445	Yes
NM_000409	GUCA1A	0	0.00718326	0.00766553	0	0	0.0287819	0	0.0050451	0	0.0074247	0	0.0118805	0.00831677	Yes
NM_000410	HFE	1.84843	12.9564	4.82015	2.5235	5.18654	4.37108	4.37771	2.08034	0.672236	1.4003	2.38101	4.59843	3.12995	Yes
NM_000411	HLCS	4.20732	12.4085	7.60704	3.53443	12.065	48.2725	4.97118	3.18755	3.07666	5.88315	5.88562	6.11408	3.43197	Yes
NM_000412	HRG	0.00955566	0.0280143	0.00747379	0.0262301	0.0200127	0.0237448	0.0116147	0.00983782	0	0	0	0	0.0567612	Yes
NM_000413	HSD17B1	5.13386	5.5015	5.61888	4.31844	15.2867	5.39508	4.54997	9.0977	5.8832	5.02078	4.5598	20.6122	3.31619	Yes
NM_000414	HSD17B4	46.3981	83.4115	59.8266	91.6985	47.4286	44.6273	151.235	22.5982	54.1896	16.4479	118.896	33.7025	63.3876	Yes
NM_000415	IAPP	0.00945909	0.0034664	0	0	0	0.0192312	0	0.0048692	0	0.00716583	0	0.126129	0.0160536	Yes
NM_000416	IFNGR1	14.7767	78.3338	50.1599	24.6939	14.2848	17.7698	25.7306	50.8084	22.9405	16.768	20.2501	18.5203	65.8329	Yes
NM_000417	IL2RA	0	0	0	0.00398455	0	0	0.0117624	0	0	0	0	0	0	Yes
NM_000418	IL4R	0.315469	15.2472	7.79018	16.1273	16.3629	5.9885	16.8304	9.02849	13.4307	17.8431	10.0531	5.15328	20.2114	Yes
NM_000419	ITGA2B	1.31604	0.0530203	0.896575	0	0.0407898	0.0201129	0.00450916	0.0601543	0.0061837	0.0674491	0.060865	0.0438454	0.0236103	Yes
NM_000420	KEL	0.0182381	0.00802028	0.0456466	0.130164	0.435439	0.238958	0.076849	0.011266	0.00810677	0.0331594	0.0217618	0.238767	0.0123812	Yes
NM_000421	KRT10	8.50572	6.40651	11.55	4.57113	7.75244	9.9202	9.31456	18.1867	8.66749	14.5509	8.87353	6.9459	7.29912	Yes
NM_000422	KRT17	0.0118328	7.40638	21.0131	7.9064	14.0761	18.6123	17.5419	15.5202	53.3242	23.7996	4.47103	3.80824	33.6678	Yes
NM_000423	KRT2	0	0.0566241	0	0.00706904	0	0.013962	0	0.0079539	0.0429261	0.0585273	0.0153641	0.00468256	0	Yes
NM_000424	KRT5	0	0.207699	14.0237	0.0388942	0.165332	0.179246	0.200108	0.654358	2.72321	3.80904	0.064407	1.57036	0.584008	Yes
NM_000425	L1CAM	0	0	0	0	0	0	0	0	0	0	0	0	0	Yes
NM_000426	LAMA2	0.00863359	3.86697	0.631744	0.137806	0.509297	0.245307	0.248746	0.558989	0.0781735	0.119182	0.0763088	0.243034	0.157922	Yes
NM_000427	LOR	0	0	0	0	0	0	0	0	0	0	0	0	0	Yes
NM_000428	LTBP2	0.123126	0.208436	1.29452	0.0219338	1.934	2.02379	0.0891764	0.0762815	0.187274	0.282303	0.162517	1.01967	0.610251	Yes
NM_000429	MAT1A	0.00548478	0.456262	13.4893	0.621044	10.2233	0.617026	0.0155555	0.177872	0	0.0831009	0.0327225	0.113026	0.0418884	Yes
NM_000430	PAFAH1B1	20.2803	21.6837	12.3715	21.4324	29.0238	33.7675	13.1409	12.3634	9.83825	15.1266	11.2211	6.52916	11.745	Yes
NM_000431	MVK	31.1918	13.9932	19.2218	25.6472	9.3309	13.581	18.7609	22.5784	6.72105	12.5208	14.9695	11.9338	38.4472	Yes
NM_000432	MYL2	0	0.0492345	0	0	0	1.12294	0.244951	0.945172	0	0.661562	0	0	0.266017	Yes
NM_000433	NCF2	0.00385652	0.180898	1.3875	0.363455	0.383648	0.106285	6.84065	1.15141	1.41994	0.7187	0.260759	11.1916	1.08649	Yes
NM_000434	NEU1	18.9268	20.8376	51.0291	19.1693	28.1201	30.2465	22.5378	109.408	19.0192	48.1081	25.6038	16.7648	71.67	Yes
NM_000435	NOTCH3	0.0219442	2.69778	6.79033	0.336584	0.344687	0.84272	0.404302	0.486326	5.67451	0.143492	0.461666	0.47601	1.89154	Yes
NM_000436	OXCT1	73.0036	20.0523	14.8562	7.84786	24.8279	32.6896	0.42006	64.6983	0.112496	0.793352	1.37454	6.53775	1.72847	Yes
NM_000437	PAFAH2	2.06374	4.3257	4.05974	5.7734	3.83371	4.45241	9.33271	3.07166	2.70063	2.38064	5.42552	2.76697	4.05086	Yes
NM_000438	PAX3	0.806877	0	0	0	0	0	0	0	0	0	0	0	0	Yes
NM_000439	PCSK1	0.516775	0.00397298	0.00282648	0.00247996	0.00946062	0.00244907	0.00146417	0.0465065	0	7.64086	0.848034	0.00438063	0.610255	Yes
NM_000440	PDE6A	0.02644	0.00968928	0.00387743	0.00378007	0.0103826	0.0014932	0.00267811	0.0102078	0	0	0.00657261	0.00600945	0.0168274	Yes
NM_000441	SLC26A4	0.0340424	0.383961	0.072481	0.021631	0.203985	0.0700659	0.104211	0	0.00700545	0.0343855	0.0225665	0.0320957	0.0353072	Yes
NM_000442	PECAM1	0.00210096	0.0107789	0.00657291	0	0	0.00664447	0	0.00865199	0	0.00636641	0	0	0.010697	Yes
NM_000443	ABCB4	3.32922	0.716051	0.0897893	0.172569	0.0147202	0.0529253	0.457532	0.101306	0.00867834	0.202335	0.554448	0.00568002	0.290265	Yes
NM_000444	PHEX	0	0	0	0	0	0	0	0	0	0	0	0	0	Yes
NM_000445	PLEC	6.54256	69.4428	34.1996	21.8047	86.7411	42.2528	23.4733	8.89481	70.1113	111.047	21.4325	34.2992	20.6673	No
NM_000446	PON1	0	0.0155821	0.0748271	0	0.122445	0.926911	0.0172275	0.010944	0.0275627	0	0.909013	0.0322142	0.288655	Yes
NM_000447	PSEN2	3.45068	11.3661	14.3909	4.58965	11.2177	6.78317	14.3319	4.71175	7.63009	12.9416	4.65542	17.8215	7.5679	Yes
NM_000448	RAG1	0.123716	0.344981	0.362581	0.333744	0.141464	0.36428	0.167083	0.196178	0.0105348	0.122809	0.353495	0.0655032	0.209966	Yes
NM_000449	RFX5	38.3779	12.1492	12.4262	14.4993	20.175	24.6627	17.0874	13.1066	8.53326	14.1147	16.3619	10.2641	7.53324	Yes
NM_000450	SELE	0	0	0	0	0	0	0	0	0.0178298	0	0	0	0	Yes
NM_000452	SLC10A2	0	0	0	0.0045253	0	0	0	0	0	0	0.0196709	0	0	Yes
NM_000453	SLC5A5	0.0495226	0.00955167	0.554497	0	0.379384	0.859642	0.00633618	0	0.00579281	0.04344	0	0.00947857	0.00884713	Yes
NM_000454	SOD1	326.386	210.185	338.656	174.373	208.796	345.758	179.461	333.073	257.408	175.861	303.767	374.612	205.408	Yes
NM_000455	STK11	16.1218	16.3651	28.9882	18.9292	26.5193	23.7355	21.2137	13.5921	22.3951	21.3667	17.9849	18.6105	31.2383	Yes
NM_000456	SUOX	8.3434	4.35561	9.69354	12.8688	7.6567	12.1396	7.60592	5.04063	5.4955	6.18271	9.7367	7.73706	13.8125	Yes
NM_000457	HNF4A	0.0864245	9.52251	7.63152	123.319	12.8631	0.165297	23.4816	7.28717	11.1255	49.4049	75.755	3.15337	32.6892	Yes
NM_000458	HNF1B	0.736938	7.27716	11.1623	4.61922	9.36368	4.85747	6.24614	4.39977	7.92839	0.67292	2.47964	0.023928	7.21945	Yes
NM_000459	TEK	0.013701	0.00860729	0.0275555	0.324155	0.0020496	0.00265291	0	0	0.00290004	0.0326208	0	0.00711784	0.00664367	Yes
NM_000460	THPO	0	0.0189398	0.0161691	0.00472895	0.0920047	0.681828	0	0.0266045	0	0.0313223	0	0.0751795	0	Yes
NM_000461	THRB	0.0442035	0.0175874	0.483034	0.0271566	0.368983	0.268183	0.850444	1.30155	0.0177771	0.0631465	0.0351627	0.160749	1.03314	Yes
NM_000462	UBE3A	11.6847	18.7139	6.94279	20.6737	18.072	15.8062	10.1264	7.46118	8.14777	15.6368	10.6087	7.74906	8.62416	Yes
NM_000463	UGT1A1	0.126805	24.2685	58.9366	76.818	0.0414954	0.132484	1.8078	41.5268	80.4924	0.168109	47.6294	0.0144105	26.8673	Yes
NM_000465	BARD1	3.30916	6.96798	3.73195	3.80373	11.1632	3.3424	3.30744	0.373609	0.745304	4.00121	2.80812	0.492161	0.84151	Yes
NM_000466	PEX1	5.22371	13.4444	4.46612	5.77875	7.41208	13.6565	9.76368	4.80933	3.68103	6.49514	7.32547	3.66693	6.73834	Yes
NM_000474	TWIST1	0	0	0	0	0	0	0	0	0	0	0	0	0.247608	Yes
NM_000475	NR0B1	0	0	0	0	0	0	0	0	0	0	0	0	0	Yes
NM_000476	AK1	55.4916	11.1909	44.8607	19.534	25.1994	20.6972	79.8048	28.6668	11.3818	21.1501	16.4272	29.9245	15.6544	Yes
NM_000477	ALB	0.0165513	0.021229	0.0258906	0	0.0476628	0.0710397	0	0.0213001	0	0	0	0.175555	0	Yes
NM_000478	ALPL	1.3853	0.0762808	0.0308767	0.00328379	0.0150325	0	0.00581626	0.0221691	0.0265874	0.0271878	0	3.42377	0.0426362	Yes
NM_000479	AMH	0.231334	2.18381	1.13988	1.21075	2.63077	0.553937	1.60086	3.9059	1.57326	2.97223	2.15303	6.50016	2.59123	Yes
NM_000480	AMPD3	0.0298762	6.80683	3.24469	1.21257	1.96873	4.43313	5.28799	0.536074	0.687708	3.05868	3.0471	0.0181078	1.32194	Yes
NM_000481	AMT	0.698491	1.07042	0.629086	0.220785	0.429994	0.979245	0.631176	0.108957	0.19444	0.782498	3.77155	2.02696	0.387965	Yes
NM_000482	APOA4	0	0	0	0.0117076	0	0.0289045	0	0	0	0.0193864	0.0127229	0	0	Yes
NM_000483	APOC2	0	0	0	2.33089	0.0133714	0	0	0	0.160816	1.04472	4.72324	0.0464359	0	Yes
NM_000484	APP	125.971	378.958	345.982	125.044	225.82	335.542	180.686	161.199	211.001	197.15	212.305	97.6283	164.224	Yes
NM_000485	APRT	418.493	136.617	100.865	285.375	95.8514	98.0003	232.09	160.397	165.152	146.51	153.998	210.289	183.636	Yes
NM_000486	AQP2	0.00447515	0.00327995	0.00525024	0.0174026	0.00468621	0.0090984	0.096097	0.0276437	0.434307	0.0847548	0.0177993	0	0.0113926	Yes
NM_000487	ARSA	1.35103	5.75238	3.53582	2.65264	3.01087	9.7839	6.03875	4.467	3.46459	3.69373	2.9365	6.80541	1.74173	Yes
NM_000488	SERPINC1	0.023312	0.0854298	0.0729323	0.00533259	0.0732344	0.0921579	0.0472255	0.0120002	0.0345404	0	0.0347702	0.0918406	0	Yes
NM_000489	ATRX	0	0	0	0	0	0	0	0	0	0	0	0	0	Yes
NM_000490	AVP	0	0	0	0	0	0	0	0	0	0	0	0	0	Yes
NM_000491	C1QB	0	0	0	0.00817969	0	0	0	0	0	0	0	0	0	Yes
NM_000492	CFTR	0.0334386	8.46305	23.1101	10.5967	0.0986805	0.0137341	16.3192	12.614	2.78688	0.200351	13.3572	0.020267	29.9669	Yes
NM_000493	COL10A1	0.0113693	0.402059	0.106708	0.00650177	0.0119055	0.00256832	0.00230319	0.0263363	0.0357965	0	0.0395674	0	0.0627104	Yes
NM_000494	COL17A1	0.165192	5.22189	0.335925	29.4001	10.9325	7.20213	106.561	3.28745	13.026	83.0647	3.71221	14.5818	27.0516	Yes
NM_000495	COL4A5	0	0	0	0	0	0	0	0	0	0	0	0	0	Yes
NM_000496	CRYBB2	0.231256	0.2587	0.456941	0.116936	0.280399	0.21996	0.443821	0.563884	0.486912	0.756083	0.24205	0.767209	0.144597	Yes
NM_000497	CYP11B1	0	0	0	0	0	0	0	0	0	0	0	0	0	Yes
NM_000498	CYP11B2	0	0	0	0	0	0	0	0	0	0	0	0	0	Yes
NM_000499	CYP1A1	1.0523	4.6669	8.90787	0.957939	1.51047	1.36484	0.174021	6.09491	0.787532	1.07376	0.327429	5.26725	6.77316	Yes
NM_000500	CYP21A2	0.0197048	0.147631	0.587359	0.00600992	0.123805	0.0959502	0.014193	0.0540977	0.0113539	0.0398068	0.0261244	0.183126	0	Yes
NM_000501	ELN	0.00267041	0	0.221393	0.1576	0	0.00241297	0.0692442	0.0247433	0.0197831	0	0.159318	0	0.140495	Yes
NM_000502	EPX	0.0994262	0.00753847	0.0670383	0.0313705	0.0933448	0.726475	0.00277817	0	0.0126996	0.0986968	0.0409091	0.0706518	0	Yes
NM_000503	EYA1	0.096959	0	0.358951	0.00295723	0.00902505	0.00973465	0	0.0709845	0	0	0.0171396	0	0	Yes
NM_000504	F10	0.206109	0.0355441	5.85077	0.64342	0.387224	0.429994	0.0294731	0.287087	0.112273	0.275541	13.1043	1.43293	0.442394	Yes
NM_000505	F12	7.583	3.42502	15.7401	14.2293	21.6861	15.2193	20.1786	10.6254	12.142	6.09825	10.2397	33.9716	13.6542	Yes
NM_000506	F2	0.0138732	0.030504	0	0.260225	0.0581099	0.035518	0.00749447	0.0238047	0.0685177	0	0.0643752	0	0.0784833	Yes
NM_000507	FBP1	0.0996344	6.12117	0.100847	43.609	0.171843	4.35318	7.30896	2.54631	2.97419	3.08132	3.83462	1.96083	28.219	Yes
NM_000508	FGA	0	0.00936904	0.00799845	0.0233929	0	0	0	0.0500101	0	0.00774716	0.0406744	0	0	Yes
NM_000509	FGG	0	0.303795	0.0306667	0	0.0293274	0.0202453	0.0317719	0.0461336	0	0	0	0	0	Yes
NM_000510	FSHB	0	0	0	0	0	0	0	0	0	0	0	0.0117028	0	Yes
NM_000511	FUT2	0.241465	4.22971	2.26157	11.0732	1.57717	0.8182	18.6076	11.0096	11.8063	13.6507	5.70234	0.252455	9.77382	Yes
NM_000512	GALNS	12.628	6.90619	4.8383	11.2537	4.16046	8.18172	5.32536	5.67142	2.74209	9.23536	7.45485	10.5153	5.7138	Yes
NM_000513	OPN1MW	0	0	0	0	0	0	0	0	0	0	0	0	0	No
NM_000514	GDNF	0	0	0.0038398	0	0	0.00665418	0	0.00505437	0	0.0260341	0	0	0	Yes
NM_000515	GH1	0	0	0.00885197	0	0	0.0255667	0	0	0	0	0	0	0	Yes
NM_000516	GNAS	761.929	341.728	713.665	609.062	433.387	944.434	283.59	252.206	951.242	1288.21	668.82	640.278	689.782	Yes
NM_000517	HBA2	2.77099	0.0902633	11.4384	108.474	3.079	19.8222	18.9361	0.412072	0.285115	5.29461	39.4315	0.970368	9.27497	Yes
NM_000518	HBB	0	0	0.0232769	1.28666	0	0	0	0	0	0.0450912	0	0	0.0252544	Yes
NM_000519	HBD	0	0	0	0.203908	0	0	0	0	0	0	0	0	0	Yes
NM_000520	HEXA	41.128	52.5766	26.1104	28.9821	43.0357	35.4051	40.5956	73.0358	40.0027	36.6766	18.9554	68.163	40.5907	Yes
NM_000521	HEXB	44.3599	145.031	83.5502	135.512	69.7703	69.1282	140.492	59.9303	58.2166	31.8576	97.0241	57.5468	85.0326	Yes
NM_000522	HOXA13	7.01239	22.0142	0.264775	8.94877	6.89902	5.33634	5.62199	1.14132	3.6792	0.479094	4.80137	0.487024	10.5879	Yes
NM_000523	HOXD13	25.9775	0.418257	5.81497	0.00735435	6.39666	0.0163412	0.019539	0.0744743	0.00297724	0.0304448	0	0	0.0204616	Yes
NM_000524	HTR1A	0	0	0	0	0	0	0	0	0	0	0	0	0	Yes
NM_000525	KCNJ11	4.05718	2.477	1.52762	0.589851	1.55406	2.4775	0.884699	0.587432	1.07302	0.773065	1.18381	3.82739	1.08476	Yes
NM_000526	KRT14	0	0.421448	0.458649	0.03907	0.393479	1.32984	0.950358	0.0820597	1.80942	3.13124	0.124544	1.14563	0.222236	Yes
NM_000527	LDLR	14.0052	59.7692	75.4968	38.1517	74.3512	78.6484	31.2175	11.2413	16.5809	66.4249	27.2621	11.7247	42.7946	Yes
NM_000528	MAN2B1	17.734	29.5901	28.2568	6.16206	14.6867	40.0297	25.5553	13.8223	35.43	20.9923	23.8974	29.2379	31.1196	Yes
NM_000529	MC2R	0	0	0	0	0	0.00462915	0	0	0	0	0	0	0	Yes
NM_000530	MPZ	0.0143189	0.132932	0.522632	4.51571	0.0899652	0.0495976	0.282336	0.280092	0.0459673	2.56722	0.246789	0	0.0324019	Yes
NM_000531	OTC	0	0	0	0	0	0	0	0	0	0	0	0	0	Yes
NM_000532	PCCB	80.9817	50.875	64.8097	59.5514	61.58	67.4057	54.756	36.2342	39.8544	45.4556	56.9591	65.4044	41.5301	Yes
NM_000533	PLP1	0	0	0	0	0	0	0	0	0	0	0	0	0	Yes
NM_000534	PMS1	3.8668	10.5132	3.79908	7.16101	5.49688	8.86071	6.95774	3.9019	5.50363	4.85547	7.36328	3.73379	5.23208	Yes
NM_000535	PMS2	7.28165	10.0578	6.11118	4.87234	15.3292	12.2783	7.44341	4.79273	1.25984	8.44105	6.24154	8.59992	6.88667	Yes
NM_000536	RAG2	0	0	0	0	0	0	0.00623461	0	0	0	0	0	0	Yes
NM_000537	REN	0.0126912	0.586008	0.124078	1.19027	0.418628	0.0315363	0.65303	0.156792	1.25517	0.394188	0	0	0.21539	Yes
NM_000538	RFXAP	11.8685	2.16619	1.7732	4.87411	5.26797	2.12334	4.00139	6.88296	0.811581	1.46927	5.27869	4.18047	1.11218	Yes
NM_000539	RHO	0.00337532	0	0.0131997	0.0030884	0	0	0	0	0	0.010228	0	0	0	Yes
NM_000540	RYR1	0.0126834	0.003984	0.00519626	0.000828948	0.015179	0.0163725	0	0.00435265	0	0.0283678	0.00240222	0.010982	0	Yes
NM_000541	SAG	0	0.00388669	0	0.0121305	0.0388716	0	0.0257827	0.0163787	0	0	0.010546	0.00642824	0.018	Yes
NM_000542	SFTPB	0.0127205	0.0111878	0.0159186	0.0104753	0	0.00574712	0.00206154	0.0130962	0.00565425	0.00385463	0	0.00925184	0.017271	Yes
NM_000543	SMPD1	8.67611	30.9033	1.45053	0.687758	10.8691	4.91134	2.62914	6.14411	0.450514	11.2969	1.78775	9.58307	7.54507	Yes
NM_000544	TAP2	11.2774	20.5788	27.3927	9.18338	17.4548	13.2903	14.6104	17.2709	2.87546	9.51143	14.6659	10.9332	28.9453	Yes
NM_000545	HNF1A	1.03741	0.375949	3.41687	24.3055	0.39229	0.537705	10.6434	11.0988	8.4967	5.51878	24.1381	7.70246	19.6607	Yes
NM_000546	TP53	46.6586	28.608	19.6378	108.248	30.3378	78.4038	63.3861	69.7158	38.2489	2.91581	44.2664	44.363	3.40655	Yes
NM_000547	TPO	0.00887743	0.075909	0.00462888	0.006769	0.00619741	0.0360973	0.0527528	0.0152326	0	0.049318	0.0176544	0.0107612	0.0100443	Yes
NM_000548	TSC2	13.2248	10.8389	14.6644	10.9255	17.2532	7.27992	13.5969	6.90189	10.8385	19.5022	17.1341	13.1315	11.2909	Yes
NM_000549	TSHB	0	0	0	0.00737017	0	0	0	0	0	0	0	0.0390563	0	Yes
NM_000550	TYRP1	0.0908716	0.0166505	0.0203067	0.00593907	0.00339848	0.0381231	0.0105193	0	0.0144258	0.0196688	0	0	0	Yes
NM_000551	VHL	15.1607	11.6664	18.6039	16.6309	16.9003	12.7464	8.7047	11.4185	10.0462	14.3956	18.5198	14.0586	7.37681	Yes
NM_000552	VWF	0	0.362882	0.0642662	0.00915693	0.0474341	0.0533053	0.0204869	0.255952	0.00390208	0.059055	0.0775131	0.0191545	0.0214542	Yes
NM_000553	WRN	5.62461	8.07158	4.25229	2.68731	5.92548	3.70572	3.62231	1.76188	4.25443	1.96	3.62871	3.50129	3.15447	Yes
NM_000554	CRX	0	0.00153468	0	0	0	0.00189205	0	0	0.00155123	0	0	0	0	Yes
NM_000555	DCX	0	0	0	0	0	0	0	0	0	0	0	0	0	Yes
NM_000557	GDF5	0	0.0575263	0.0122777	0	0.0246571	0.393618	0.0127202	0	0.00581467	0.0178379	0	0.0190287	0	Yes
NM_000558	HBA1	5.75489	0.0710882	25.8812	168.376	6.55106	40.7974	29.0015	0.698995	0.491008	8.42543	65.1959	2.13592	15.4461	Yes
NM_000559	HBG1	0	0	0	0	0	0.0648358	0	0	0.141751	0.410698	0	0	0	Yes
NM_000560	CD53	0	0.0130667	0	0.00543755	0	0	0.0048155	0.0489455	0	0.0180078	0	0.00720371	0.0605144	Yes
NM_000561	GSTM1	14.6477	3.91015	0.343632	14.1994	2.25929	0.910967	3.36944	1.75276	0.151118	1.05794	5.88209	5.99152	0.679075	Yes
NM_000562	C8A	0	0	0	2.29874	0	0	0	0.0120301	0.00577111	0	0	0	0	Yes
NM_000564	IL5RA	0.0514538	0	0	0	0	0.00217938	0	0.00331082	0	0	0	0	0	Yes
NM_000565	IL6R	0.00315995	6.46397	0.231085	0.238535	1.08369	2.2193	0.126748	1.05243	0.00468197	0.624795	0.185382	0.363894	1.4909	Yes
NM_000566	FCGR1A	0.00857908	0.0157195	0.010065	0.18447	0.0224592	0.0426362	0.00695179	0.0353296	0.0572007	0.0194975	0.0767748	0.0519975	0.0145601	Yes
NM_000567	CRP	0	0	0	0	0	0	0	0	0	0	0	0	0	Yes
NM_000569	FCGR3A	0	0	0	0	0	0	0	0	0	0	0	0	0	Yes
NM_000570	FCGR3B	0	0	0	0.00398889	0	0.0118176	0	0	0	0	0	0	0	Yes
NM_000572	IL10	0	0.0209915	0.0358413	0	0	0.00776389	0.00464162	0.353837	0.0678971	5.38086	0.0113914	0	0.0291647	Yes
NM_000573	CR1	0	0	0.000845821	0	0	0.00195435	0.00175261	0.00111336	0	0	0	0	0	Yes
NM_000574	CD55	12.6854	53.8044	104.181	4.7994	12.4	17.3279	25.967	11.0476	66.9701	20.5036	2.64677	61.1527	29.9189	Yes
NM_000575	IL1A	0.0255122	0.224382	0.558709	0.0160486	0.0333942	0.00432238	0.00775238	0.0656637	0.0472504	0.149784	0.0190258	0.0386571	0.0757718	Yes
NM_000576	IL1B	0	0.031907	0.0194567	0.167868	0.0325621	0.00280979	0.0453553	0.352152	0.0322511	0.207299	0.0494714	0.0226163	1.05548	Yes
NM_000577	IL1RN	0	3.03934	21.3572	0.356026	0.0111631	0.103551	12.8581	0.548756	28.6521	0.048455	0.943401	0.0581507	1.06744	Yes
NM_000578	SLC11A1	0.0290451	0.0940213	0.140089	0.302303	0.167282	0.284321	0.115718	0.14453	0.208002	0.176027	0.0914556	0.231787	0.283441	Yes
NM_000579	CCR5	0	0	0	0	0	0	0	0	0	0.00774081	0	0	0.00867087	Yes
NM_000581	GPX1	30.7034	58.5448	145.078	109.68	208.162	100.248	142.739	76.1426	193.218	331.661	75.1325	142.612	109.354	Yes
NM_000582	SPP1	0	0.0302203	0.0230352	0	0.0123363	0.00532251	0	0	0	0.0624721	0	0	0	Yes
NM_000583	GC	4.11849	0	0	0.0517992	0	0	0	0	0	0	0.534766	0	0	Yes
NM_000584	IL8	0	7.96789	5.16596	0.0350784	0.0688206	102.437	3.53259	0.710447	26.6567	7.87474	0.370312	0.0796665	2.39809	Yes
NM_000585	IL15	0.158325	0.709891	1.18732	0.230081	0.604651	0.210385	1.17728	6.24192	0.00344975	0.112885	0.0555631	0.558825	1.24867	Yes
NM_000586	IL2	0	0	0	0	0	0	0	0	0	0	0	0	0	Yes
NM_000587	C7	0	0.0663707	0	0.226267	0	0.00314716	0.00564456	0.42073	0.0326832	0	0.0923524	0	0	Yes
NM_000588	IL3	0	0	0	0	0	0	0	0	0	0	0	0	0	Yes
NM_000589	IL4	0.030356	0.0148325	0	0	0	0	0	0	0	0.015331	0	0.0122658	0	Yes
NM_000590	IL9	0	0	0.0122829	0	0	0	0	0	0	0	0	0	0	Yes
NM_000591	CD14	0.0571764	1.69719	1.07327	1.39161	1.1795	3.67592	0.0370649	0.0824106	0.0847158	0.294539	0.864163	0.187134	0.611336	Yes
NM_000593	TAP1	10.4054	27.5095	69.2725	14.3073	22.6126	25.0028	81.9362	16.7551	11.2282	19.8	45.2243	22.9597	88.0137	Yes
NM_000594	TNF	0	0.0205021	0.0131272	0	0	0.027804	0.0589344	0	0	1.5851	0	0.0135635	0.465252	Yes
NM_000595	LTA	0.0202009	0.0394821	0.0105332	0	0.0282049	0.0425915	0	0.013865	0	0.765171	0	0.261199	0	Yes
NM_000596	IGFBP1	0	0	0.0708158	0	0	0.0102267	0.940026	0	0	0.0257216	0	0	0.854756	Yes
NM_000597	IGFBP2	206.072	56.9481	1.65007	114.322	37.3786	0.109186	1.34434	6.69084	554.051	3.45375	22.0818	48.0991	1.40781	Yes
NM_000598	IGFBP3	0	1.25514	3.74977	1.03208	4.8145	11.717	3.42718	3.21328	0.00794575	9.29522	0.455031	2.19723	0.467207	Yes
NM_000599	IGFBP5	0.0884553	0.00659299	0.00469042	0.0027436	0	0.0778959	0	0	0	0	0	0.014539	0.00508891	Yes
NM_000600	IL6	0	0	0	0	0	0.00711309	0	0	0	0.0477079	0	0	0.0667999	Yes
NM_000601	HGF	0	0	0	0	0	0	0	0	0	0	0	0	0	Yes
NM_000602	SERPINE1	0.0117364	14.0662	0.197357	0.059063	54.4658	4.80405	0.0808369	0.0392696	0.0847729	11.3805	0.332595	0.00711338	0.956089	Yes
NM_000603	NOS3	0.261602	0.293888	13.4907	6.22641	0.321093	5.27308	0.437863	1.25612	6.32717	7.45933	7.50515	8.81415	1.80867	Yes
NM_000605	IFNA2	0	0	0	0	0	0	0	0	0	0	0	0.0198354	0	Yes
NM_000606	C8G	0.10588	0.356969	0.0993744	1.23521	0.210659	0.287018	0.454721	1.00286	1.06677	1.07482	0.0421123	0.474883	1.18599	Yes
NM_000607	ORM1	0	0.0162367	0	0.00506754	0	0.0550486	0	0.0228075	0.0164118	0	0	0	0	Yes
NM_000608	ORM2	0	0.0161412	0.00861245	0.0806036	0	0.0547248	0.0178457	0.0113366	0.122365	0.0667349	0.0656951	0.0266961	0.0934413	Yes
NM_000609	CXCL12	0.0923055	0	0	0	0	0	0	0	0	0.00399582	0.0104895	0	0	Yes
NM_000610	CD44	24.4331	16.0119	45.6053	38.2698	62.7311	241.024	38.5196	29.4883	59.7409	42.2525	51.9401	17.962	119.339	Yes
NM_000611	CD59	6.51366	28.7944	28.5217	7.31148	66.2234	50.5223	12.6805	15.8504	13.0038	42.8263	13.4713	12.5217	45.3649	Yes
NM_000612	IGF2	0	1.58328	0.110467	0.00331365	0.0227538	0.859818	0.0264112	2.49619	0.0120731	0.10151	0.0648182	0.0921891	0.0799015	Yes
NM_000613	HPX	0.080243	0.210043	0.0582777	0.217643	0.126041	0.256365	0.00928893	0.0118018	0.0339693	0.0521047	0.136781	0.45161	0.15564	Yes
NM_000614	CNTF	0.434649	0.510428	0.552424	0.763767	0.832715	0.386053	0.548319	0.0661055	0.146364	0.778281	0.677752	0.233503	0.285008	Yes
NM_000615	NCAM1	0.0344339	0	0.27544	0.00429639	0.013112	0.0311144	0.00507318	0.00644558	0	0.00474287	0.00622529	0.0113838	0	Yes
NM_000616	CD4	0.586857	0.008778	0.0936734	0.023287	0.0125415	0.112279	0.031541	0.0647342	0	0.0725844	0.0238178	0.0834787	0.0304895	Yes
NM_000617	SLC11A2	35.6388	11.2025	10.8075	111.541	11.0322	7.72199	8.1487	5.89004	9.61303	9.96075	17.821	3.64533	18.6478	Yes
NM_000618	IGF1	0	0.00749216	0.0319807	0	0.0026761	0	0.00207083	0.0565672	0.390007	0.220704	0	0.00154892	0	Yes
NM_000619	IFNG	0	0	0	0	0	0	0	0	0	0	0	0	0	Yes
NM_000620	NOS1	0.000766441	0	0.00299729	0	0.0064207	0.0045016	0.00124212	0	0	0	0.00609683	0.00185815	0	Yes
NM_000621	HTR2A	0.456446	0	0	0	0	0	0	0	0	0	0.0208673	0.00635978	0	Yes
NM_000623	BDKRB2	0.00445703	3.6407	2.11774	2.17468	0.0163353	0.105718	6.10003	1.22058	2.31463	0.226223	4.60022	0.00540278	1.29728	Yes
NM_000624	SERPINA5	0.00807573	0.0059189	1.84751	0.188426	0	0.202498	0	0	0.0598274	0.0978856	0.0401502	0	0.0137058	Yes
NM_000625	NOS2	11.9601	1.47637	1.91791	0.309547	3.12814	1.04095	0.252634	0.368782	0.0950086	1.11225	1.05974	1.52511	3.68136	Yes
NM_000626	CD79B	0	0	0.0462231	0.00337969	0.0154715	0.0267008	0	0.0228165	0	0.0671563	0.102838	0	0	Yes
NM_000627	LTBP1	11.282	16.9464	4.7951	0.185862	4.40704	3.32768	0.255094	1.1751	3.62074	1.44956	0.101427	2.79276	5.49499	Yes
NM_000628	IL10RB	6.56919	9.46695	7.62969	11.2454	12.0572	18.9444	14.4112	10.1274	3.83119	5.95872	12.9394	4.04291	14.02	Yes
NM_000629	IFNAR1	5.3353	16.682	10.1949	3.91874	13.6109	16.0893	6.57191	7.20541	3.53571	7.25667	7.53997	5.98607	8.69838	Yes
NM_000631	NCF4	0	0.18027	5.29286	0.285877	0.0139222	0.0150168	0.942664	0.0615947	0.00492471	0.54388	0.925393	0	0.11282	Yes
NM_000632	ITGAM	0.0353051	0.00575022	0.0368177	0.01346	0.0739404	0.051397	0.0127148	0.0222124	0.0319673	0.00891524	0.0234035	0	0.0965351	Yes
NM_000633	BCL2	1.60536	0.0971703	0.0157795	0.11076	2.42503	0.697301	0.0151805	0.289307	0	0.0676853	0.00859752	1.05336	0.0709262	Yes
NM_000634	CXCR1	0	0.0330869	0.0353083	0.0172109	0	0.00169965	0.0335323	0	0.0222958	0.0227993	0	0	0	No
NM_000635	RFX2	0.14051	1.76566	3.85881	5.08042	2.05042	3.57241	1.16245	0.816623	0.742088	0.710775	1.51433	1.60435	2.4616	Yes
NM_000636	SOD2	28.829	28.7451	62.8113	30.773	30.3788	41.1547	29.2508	11.3366	8.674	25.2652	29.1435	6.41133	45.329	Yes
NM_000637	GSR	40.6603	64.9658	54.5664	31.154	42.6644	45.3499	29.4676	16.3751	66.2958	8.12523	25.7059	23.3711	30.2181	Yes
NM_000638	VTN	0.238855	0.0407122	0.134681	0.017789	0	0.00250963	0	0.080063	0.0370362	0.0757451	0.0994199	0.41074	0.311101	No
NM_000639	FASLG	0	0.438186	0	0.00919392	0	0	1.80756	0.10862	0.405692	10.7405	0.049956	0	0.0170532	Yes
NM_000640	IL13RA2	0	0	0	0	0	0	0	0	0	0	0	0	0	Yes
NM_000641	IL11	0.122998	0.255905	0.14275	0.00363041	0.162038	6.03567	0.135034	0.551454	0.217514	1.08207	0.0473428	0.6012	0.444431	Yes
NM_000642	AGL	9.4571	11.5495	6.83814	5.04191	11.4689	9.91139	3.31133	3.17258	2.69494	2.51833	6.35452	3.31106	3.69185	Yes
NM_000643	AGL	9.60666	11.6895	6.89271	5.09235	11.5742	9.98974	3.35576	3.23345	2.74741	2.52792	6.4552	3.37083	3.73143	Yes
NM_000644	AGL	9.66377	11.7445	6.91781	5.11774	11.6165	10.0192	3.37757	3.24847	2.76661	2.53923	6.48858	3.38803	3.75832	Yes
NM_000645	AGL	9.48692	11.4939	6.77666	5.01039	11.3555	9.784	3.32436	3.19112	2.72208	2.49851	6.35247	3.33109	3.6795	Yes
NM_000646	AGL	9.58676	11.6685	6.87522	5.08614	11.5534	9.97292	3.35181	3.22763	2.74246	2.52337	6.44357	3.36633	3.72691	Yes
NM_000651	CR1	0	0	0.000731108	0	0	0.0016893	0.00151491	0.000962364	0	0	0	0	0	Yes
NM_000655	SELL	0.00763751	0.657732	0.203101	0.0104824	0.331905	0.0345062	0	0.0314521	0.0198033	0.0173576	0.0151886	0.0509197	0.110178	Yes
NM_000657	BCL2	1.82082	0.357765	0.0242403	0.347386	3.09939	1.40374	0.0627848	0.486594	0	0.199569	0.0308173	0.535359	0.157798	Yes
NM_000658	AIRE	0	0	0.00743206	0	0.00497523	0	0	0.0146743	0	0	0.0850369	0	0	Yes
NM_000660	TGFB1	39.6783	53.5901	40.7823	2.76093	59.7798	73.9578	28.8668	2.1176	15.0085	9.62546	21.3799	88.0832	19.0879	Yes
NM_000661	RPL9	155.679	50.3943	52.2691	83.0506	45.9116	81.4743	185.803	72.583	38.5171	34.9378	79.9132	72.6464	47.781	Yes
NM_000662	NAT1	2.38409	3.87922	2.46186	2.02935	3.11115	1.17569	4.85284	2.81277	1.43528	0.771229	1.95226	2.17221	4.02856	Yes
NM_000663	ABAT	6.72159	5.99669	0.865088	3.44431	1.44341	6.60956	0.220682	0.870384	0.298303	2.27577	0.940317	1.33266	1.36109	Yes
NM_000665	ACHE	0.0211855	0.111797	0.0762215	0.0930463	9.78789	6.63886	0.133903	0.593262	0.332731	0.23111	0.13482	0.28249	2.23642	Yes
NM_000666	ACY1	30.3902	22.4196	36.6418	103.187	38.4522	36.48	102.647	33.8489	56.2378	41.0358	99.5219	18.8047	86.3496	Yes
NM_000667	ADH1A	0.0248105	0	0.00970256	0.0510783	0.00649517	0	0	0.0447005	0.00919018	0	0	0.0300751	0.0210537	Yes
NM_000668	ADH1B	0	0	0.0272039	0.00636502	0	0.00314287	0	0	0	0	0	0.00421622	0.0531272	Yes
NM_000669	ADH1C	0	0	1.46708	0.0635665	0	0.105576	0	0.0910297	0	0.220086	0.0502392	0	2.0151	Yes
NM_000670	ADH4	0	0	0	1.23422	0	0.00212713	0	0.0242358	0.00697585	0	0.299616	0	0.0799046	Yes
NM_000671	ADH5	24.4335	20.6214	29.0311	20.6773	36.1262	38.4971	16.7875	21.9175	17.2487	8.35256	23.0284	18.5119	26.9063	Yes
NM_000672	ADH6	0.0797708	0.0341052	0.0207971	1.54495	0.0348054	0.0210235	0.312426	0.26691	0.0196988	0.0100719	5.36728	0.0402906	1.04922	Yes
NM_000673	ADH7	0	0	0	0	0	0	0	0	0	0	0	0	0	Yes
NM_000674	ADORA1	0.00960634	0.272241	2.02612	0.00292991	3.13853	2.30316	0.0674631	0.0362633	0	3.26026	0.0254719	1.64191	0.0489104	Yes
NM_000675	ADORA2A	1.36261	0.296404	0.316304	0.0966757	0.30903	0.594228	0.0118091	0.393848	0.323892	0.182164	0.0797002	1.52809	0.154584	Yes
NM_000676	ADORA2B	0.287688	25.9204	17.0891	7.1504	13.276	22.8132	24.9116	18.0927	28.6436	18.2619	11.0577	8.05693	24.3116	Yes
NM_000677	ADORA3	0.00833091	0	0	0.0133398	0	0.0112917	0.0067507	0	0	0.0126223	0.0165675	0	0	Yes
NM_000678	ADRA1D	0.0105245	0.0694229	0.0685961	0.00641989	0.00734723	0.0332846	0.0795965	0.130023	0	4.58177	0.0279065	0	0.0535852	Yes
NM_000679	ADRA1B	0.28627	0	0.0454291	0.022777	1.19474	0.423623	0	0	0.0184415	0.132006	0	0	0	Yes
NM_000680	ADRA1A	0	0	0	0	0.00858625	0.00740908	0	0	0	0	0	0	0	Yes
NM_000681	ADRA2A	0.980916	0.0177078	0.00377934	14.8889	0.02024	0.289265	11.3472	0.0198991	0.00715952	0.530787	1.91229	0.00585743	0.00820084	Yes
NM_000682	ADRA2B	0.23206	0.029397	0.315948	0.013107	0.822017	1.04974	0.0417874	0.0914358	0.0169795	0.0520888	0.102554	0.552185	0.0388981	Yes
NM_000683	ADRA2C	0.057334	5.41727	0.59043	0.59455	3.77239	2.09602	0.890461	0.865729	0.31502	7.57922	0.313553	1.58691	0.462198	Yes
NM_000684	ADRB1	1.69019	0.203668	0.00511392	0.233323	0.602519	0.682387	0.272859	1.22177	0.346336	0.0445793	0.156035	0.106999	0.172	Yes
NM_000685	AGTR1	5.48731	0	0.00620651	0	0	0	0	0	0	0	0	0	0	Yes
NM_000686	AGTR2	0	0	0	0	0	0	0	0	0	0	0	0	0	Yes
NM_000687	AHCY	215.325	111.88	158.629	340.976	107.212	200.332	203.838	61.2984	159.357	304.598	301.739	122.906	143.897	Yes
NM_000688	ALAS1	34.1799	21.5934	61.4822	34.3278	83.883	67.9909	37.7681	18.3924	25.0851	33.686	28.759	14.8224	45.0634	Yes
NM_000689	ALDH1A1	92.9062	0.158397	26.4703	20.1358	0.197505	0.197057	31.4298	328.458	256.689	1.37525	91.9819	11.2744	133.589	Yes
NM_000690	ALDH2	124.323	51.9812	65.3555	256.687	46.1456	57.1154	224.141	95.9106	392.277	81.2835	186.226	150.517	214.957	Yes
NM_000691	ALDH3A1	0.183115	53.561	0.818399	46.581	2.39415	21.6424	173.844	32.8512	156.951	0.475612	16.4703	92.2064	10.5219	Yes
NM_000692	ALDH1B1	53.0296	38.0672	25.8889	41.0644	16.6927	26.8976	94.1978	98.9399	28.8126	16.4662	76.248	14.3781	21.3558	Yes
NM_000693	ALDH1A3	0.0346856	8.89963	190.773	0.291737	1091.24	566.871	1.68422	1.63166	4.89609	40.308	0.594278	0.381645	2.78486	Yes
NM_000694	ALDH3B1	0.22861	3.82946	19.0231	2.48133	3.44517	0.058379	11.5041	1.54178	15.51	16.149	4.13124	6.12876	4.99324	Yes
NM_000695	ALDH3B2	0	0.317211	1.27147	0.246299	0.0515853	0.0937952	0.498974	0.181131	1.07399	1.06092	0.104964	0.255921	0.316506	Yes
NM_000696	ALDH9A1	44.9314	41.1792	22.2474	41.2518	44.2752	37.3142	56.1929	19.3836	21.8348	20.4048	53.7653	19.7954	29.6002	Yes
NM_000697	ALOX12	0.264378	0.523466	0.274676	0.379104	0.499977	0.361902	0.377302	0.19906	0.257248	0.239143	0.462986	0.296561	0.19421	Yes
NM_000698	ALOX5	0	0.0160406	7.15511	0.151858	0.0343768	2.05009	13.2358	0.893766	0	0.16027	0.31192	0.0619025	1.08954	Yes
NM_000699	AMY2A	0.0456018	0.0208892	0.0178333	0.122568	0	0.0257535	0.027714	0	0.00422289	0	0.0566797	0.0138195	0.00967419	Yes
NM_000700	ANXA1	30.1143	280.823	425.568	19.2117	455.478	457.667	257.333	164.217	640.088	312.98	5.14116	897.198	168.638	Yes
NM_000701	ATP1A1	178.89	363.017	189.512	913.207	96.3273	301.712	583.518	295.405	351.452	279.803	656.036	111.722	381.663	Yes
NM_000702	ATP1A2	0.0444077	0.112664	0.0440838	0.164875	0.0143083	0.043985	0.0775049	0.0105505	0.00759196	0.0543439	0.122279	0.010352	0.0521771	Yes
NM_000704	ATP4A	0.00261373	0.0478917	0	0.00119577	0.010948	0.0059044	0.00211796	0.00538182	0.00387266	0.0831624	0.0363852	0.0253468	0.00887184	Yes
NM_000705	ATP4B	0.024893	0	0	0.0142356	0.0195503	0.0168699	0	0	0.0184415	0	0.0990086	0	0.0211237	Yes
NM_000706	AVPR1A	0.00900844	0	0	0	0	0.002035	0	0	0	0	0	0	0	Yes
NM_000707	AVPR1B	0	0.0115944	0.0164971	0	0.0110436	0.0262062	0	0	0	0.0159788	0	0	0	Yes
NM_000709	BCKDHA	45.8645	17.3789	34.821	26.4249	19.1846	60.6276	31.3075	7.6365	17.9203	22.8505	22.7059	22.838	22.8876	Yes
NM_000710	BDKRB1	0.028711	0.978498	0.269469	0.784827	0.0150325	0.0389147	1.02948	0.0591175	5.38129	0.0217503	0.599519	0	0.511634	Yes
NM_000712	BLVRA	39.201	37.9726	20.4425	1.47454	41.1759	96.1658	15.3151	9.73348	23.4126	24.2083	5.31574	36.2046	36.6566	Yes
NM_000713	BLVRB	15.567	66.1381	82.3799	13.5276	54.436	75.5131	85.7012	65.9981	50.8493	32.3812	22.8509	123.724	106.823	Yes
NM_000714	TSPO	188.314	51.0243	143.618	85.5085	107.61	159.107	246.903	158.232	161.203	60.5552	85.5799	250.887	114.208	Yes
NM_000715	C4BPA	0	0	0.0162319	0.0797547	0	0	0.0100901	1.34607	0	0	0	0.00503142	0.584682	Yes
NM_000716	C4BPB	0	21.908	10.7948	0.550061	0	0.00754457	15.2432	15.9628	17.8824	0.569271	1.29515	0.131575	10.5428	Yes
NM_000717	CA4	0.0241646	0	0	1.2603	0	0.0181959	0.0195811	0.116098	0	0	9.57913	0	0	Yes
NM_000718	CACNA1B	2.46936	0.00348719	0.0119082	0.0104483	0.0159434	0.00816856	0.00385543	0.000979682	0.00140992	0.0100923	0	0.0334516	0	Yes
NM_000719	CACNA1C	0.693317	0.00507135	0.0671067	0.314341	0.0528933	0.0481426	1.38994	0.329825	0.192739	0.886913	0.172004	0.0234852	0.0387526	Yes
NM_000720	CACNA1D	1.84513	0.830187	0.484168	3.53269	1.63625	0.775204	0.450194	0.177511	0.0620928	0.107035	2.50976	0.882471	0.290592	Yes
NM_000721	CACNA1E	0.00124747	0	0.0107326	0.0336721	0	0.000563606	0.0020217	0.642153	0	0.0812729	0.00372124	0	0	Yes
NM_000722	CACNA2D1	0.00969673	1.31124	0.0132722	0.00332717	0	0	0	0.0574026	0	0.0146917	0.0337465	0	0.0246854	Yes
NM_000723	CACNB1	6.09033	2.25562	3.29582	1.27687	2.4503	2.65478	1.14291	0.038483	2.04364	3.39427	1.42724	3.33488	0.469446	Yes
NM_000724	CACNB2	4.64333	0.678193	0.0833184	0.10225	0.382774	0.45864	0.176027	0.952648	0.0309484	0.0664594	0.598162	0.11394	1.27619	Yes
NM_000725	CACNB3	6.00147	5.07978	12.0613	7.58983	8.99626	18.5646	8.5264	4.50833	12.7594	6.64429	6.62221	6.3966	8.35688	Yes
NM_000726	CACNB4	4.26999	0.870377	0.00915988	0	0.966385	0.970936	0.001898	0.013263	0.00260285	0.0177442	0.0372645	0.0056786	0.554545	Yes
NM_000727	CACNG1	0	0.00518911	0	0	0.00741392	0.172732	0	0	0.0104902	0.171633	0	0	0	Yes
NM_000728	CALCB	0	0.145676	0.939804	0	0.0283819	0.00816358	0.0146417	0	0	1.20458	0.0359336	2.94598	0.137997	Yes
NM_000729	CCK	0.00626491	0.0183668	1.8032	0	0.892211	0.0367962	0.0761487	0.0064499	0	1.42381	0.0249178	0.0759427	0	Yes
NM_000730	CCKAR	0	0	0	0	0	0	0	0	0	0	0	0	0	Yes
NM_000732	CD3D	0	0	0.00981311	0.00574004	0	0.0170056	0	0	0	0	0	0	0	Yes
NM_000733	CD3E	0	0	0	0	0	0.0194488	0	0	0	0	0	0.0149091	0	Yes
NM_000734	CD247	0	0.0122064	2.41414	0.0101591	0.040693	0.112867	0.224923	0	0.567551	0	0	0.0672945	0.320339	Yes
NM_000735	CGA	0	0	0	0	0	0	0	0	0	0	0	0	0	Yes
NM_000737	CGB	0.406064	0.0818439	0.547853	0.0464433	1.89221	0.880604	0.0164521	0.0627081	0.338427	0.384522	0.0201883	1.84585	0.258433	Yes
NM_000738	CHRM1	0.00662639	0.993184	0.0958802	0.106104	0.0138778	0.155677	1.01483	0.900511	0.117816	0.110437	0.480989	0.0803246	2.20422	Yes
NM_000739	CHRM2	0	0	0	0	0	0	0	0	0	0	0	0	0	Yes
NM_000740	CHRM3	0.561586	2.30496	0.0479165	3.67168	0.0320767	0.12148	2.28635	0.714827	1.74989	0.371289	0.568562	0.367193	1.75602	Yes
NM_000741	CHRM4	0.713611	0.0280191	0.0598005	0.0932785	0.0800643	0.00575729	0.0206519	0.019679	0.00472021	0.617832	0.0506838	0.0308941	0.086508	Yes
NM_000742	CHRNA2	0.00459488	0	0	0.00105107	0	0.00207596	0	0	0.00340402	0	0.00913776	0	0	Yes
NM_000743	CHRNA3	1.14885	0.196059	0.162973	0.0502409	0.232941	0.1692	0.015972	0.0927668	0.13142	0.0469293	0.0615974	0.139946	0.0669044	Yes
NM_000744	CHRNA4	0.00340789	0.00249773	0	0.0015591	0	0.0184762	0	0.0105256	0	0.0103267	0	0	0	Yes
NM_000745	CHRNA5	16.1455	7.24186	8.07906	3.57055	6.56024	4.6389	3.35436	1.25331	6.8996	3.62247	2.67228	3.4766	4.37287	Yes
NM_000746	CHRNA7	1.12004	0.19448	1.16002	2.79593	2.48906	1.82349	0.0294232	0.2358	0.00413846	0.0761746	1.30534	2.76282	0.165913	Yes
NM_000747	CHRNB1	0.852626	12.6355	8.68422	0.732919	10.1736	25.9701	34.0307	0.901421	1.60887	6.12895	0.509441	3.55948	0.57103	Yes
NM_000748	CHRNB2	10.3818	0.0323585	0.00895249	0.00299236	0.0188353	0.0236407	0.00265004	0.109425	0.0193822	18.2492	0.266652	0.0277501	0.0610536	Yes
NM_000749	CHRNB3	0	0	0	0	0	0	0	0	0	0	0	0	0	Yes
NM_000750	CHRNB4	0.0648395	0.044727	0.883004	0.00174493	0.0718915	0.25848	0.0278157	0	0.00565117	0.225373	0.022755	0.194183	0.0129462	Yes
NM_000751	CHRND	0.0160179	0	0.0250562	0	0	0.0241228	0	0.0109939	0	0.0323586	0	0.103556	0	Yes
NM_000754	COMT	35.1944	37.7271	64.9979	32.4677	24.8509	31.2633	60.4717	64.07	111.508	33.1324	22.8923	68.7922	49.3949	Yes
NM_000755	CRAT	18.1876	33.1822	12.8215	15.0966	18.4672	46.5678	94.8351	6.30509	5.60705	39.4267	5.77826	11.0887	1.79992	Yes
NM_000756	CRH	0	0	0	0	0	0	0	0	0	0	0	0	0	Yes
NM_000757	CSF1	0.458834	5.76221	1.07316	1.16664	1.69783	0.808273	0.529103	0.0840296	0.0196106	0.310829	0.337791	1.47071	0.3332	Yes
NM_000758	CSF2	0	2.68662	1.39175	0.445031	3.92545	1.23807	0.519085	0.19541	2.29375	5.69763	0.49542	0	0.523461	Yes
NM_000759	CSF3	0.0117217	0.00429556	0	0	0	0.0105917	0	0.00603391	0.0173675	0.0887988	0.0466215	0.0284179	0.0198936	Yes
NM_000760	CSF3R	0	0	0	0	0.00572166	0.00123431	0	0	0	0	0	0	0	Yes
NM_000761	CYP1A2	0	0.0087556	0.151831	0.00409898	0.00625476	0.0566709	0	0.021523	0.00442501	0.0226247	0	0	0	Yes
NM_000762	CYP2A6	0	0	0.0330314	0.0120758	0	0.00477014	0	0	0	0	0.083987	0.0383954	0	Yes
NM_000764	CYP2A7	0	0	0.012787	0.0392679	0	0.00369322	0	0	0	0	0.146308	0	0.0138734	Yes
NM_000765	CYP3A7	0.0179049	0.0951412	0.0525149	0.505821	0.0984339	0.0384246	1.14256	0.25807	0.311715	0.128858	0.703241	0.0379823	0.243099	Yes
NM_000766	CYP2A13	0	0.00781322	0	0.00731561	0	0	0	0	0	0	0	0	0	Yes
NM_000767	CYP2B6	0.036693	0.0291343	0.00956626	13.4198	0	0.0607854	1.38011	7.25308	0.0385096	0.19458	14.0834	0.00741316	15.2208	Yes
NM_000769	CYP2C19	0.0126313	0.0462889	0.0345776	1.74808	0	0	0.0204707	0.0130042	0	0	1.2811	0	0.310841	Yes
NM_000770	CYP2C8	0.00968419	0.00709778	0.0454459	0.385453	0	0.0043753	0.00784729	0	0.0825048	0.0146727	0.173329	0.0704346	0.180792	Yes
NM_000771	CYP2C9	0.00500523	0.0183423	0.0078295	1.1083	0	0.00678406	0.0162233	0	0	0.136503	1.20441	0.0060673	0.118925	Yes
NM_000772	CYP2C18	0.0256533	0.0590917	0.355424	1.20716	0.00383759	0.00331146	0.0148481	0.0113189	0.0108598	0	0.0728803	0.0488662	1.67309	Yes
NM_000773	CYP2E1	0.301568	0.00818617	0.375638	0.39857	0.286551	0.133725	0.226265	0	1.10878	0.177688	0.0555299	3.08017	0.170603	Yes
NM_000774	CYP2F1	0	0.0747278	0.0119617	0.0536425	0	0.0138194	0.00413094	0.0367391	0	0.0463437	0.0202763	0.0679762	0.181691	Yes
NM_000775	CYP2J2	1.78568	33.8846	4.67638	10.6524	2.82586	2.0917	64.9105	6.31565	10.4493	2.20393	27.5913	1.33767	16.2426	Yes
NM_000777	CYP3A5	0.0430582	0.114399	1.46496	10.0982	0.845417	0.153197	23.3769	7.27006	5.72184	1.67173	17.2222	0.580667	6.27545	Yes
NM_000778	CYP4A11	0	0.0294306	0	0.0200409	0	0	0.00295804	0.030066	0.00540873	0	0.0145192	0.00442506	0	Yes
NM_000779	CYP4B1	0	0.0918045	0.0270257	1.05323	0	0.00975711	0.181998	0.226785	0.0863949	0.222501	0.515375	0	0	Yes
NM_000780	CYP7A1	0.00649759	0.00238112	0.0101639	0.00743157	0.0136081	0	0	0.0267578	0	0	0	0.00787632	0	Yes
NM_000781	CYP11A1	0	0	1.43015	0.00882901	0.0202087	0.00871904	0	0	0	0.0438593	0	0	0	Yes
NM_000782	CYP24A1	0.0314086	0.401807	3.78535	0.00261261	0.00597999	1.70156	0.0277648	0.00587929	0.0528828	19.1822	0.0794969	0.00346121	0.096919	Yes
NM_000783	CYP26A1	0	0.0516275	0.048207	0.084594	0.663863	2.61362	0.0142698	0.0362602	0.0228306	0.1801	1.02436	0.202795	0.283928	Yes
NM_000784	CYP27A1	0.060989	0.184761	0.734602	28.0399	0.0894115	13.7112	0.38548	11.4403	0.786174	3.40668	15.5329	0.0739303	0.572744	Yes
NM_000785	CYP27B1	1.37997	3.41901	4.64282	1.90772	2.26967	4.34055	0.565184	0.567514	0.0611169	0.676105	0.976917	2.29553	0.86553	Yes
NM_000786	CYP51A1	26.8548	69.7299	52.0448	39.019	12.8378	43.6369	53.1474	26.971	11.5796	19.465	36.8628	30.265	55.4495	Yes
NM_000787	DBH	0.00337654	0	0.0316908	0	0	0.00762758	0	0.187717	0	0.29672	0.0268595	0	0.0114611	Yes
NM_000788	DCK	18.0208	15.5768	12.4495	16.4447	34.8296	20.7503	10.1948	4.60041	8.11266	11.7489	12.4067	4.09615	10.4299	Yes
NM_000789	ACE	0.241772	4.36821	3.60898	8.03938	7.18899	3.69273	2.91287	0.706214	0.96776	0.976837	4.30864	3.48736	0.518474	Yes
NM_000790	DDC	0.0855208	0.0626803	0.680034	45.0487	0.0746285	0.0472244	55.6973	24.105	0.67228	0.410318	102.186	0.535616	67.0477	Yes
NM_000791	DHFR	41.7026	35.1534	23.2587	25.1073	18.5281	9.46749	66.2761	15.4011	11.8318	8.53111	37.4218	13.9141	16.2009	Yes
NM_000792	DIO1	0.0100427	0.0772855	0.0706923	0.107971	0.0157745	0	0.0122067	0.0206784	0.0185998	0.0456475	0.379462	0.0121737	0	Yes
NM_000793	DIO2	0.0234875	0.00645547	0.00688888	0	0.0199836	0	0.0190324	0.00906789	0.0228378	0.0133449	0	0.0302508	0	Yes
NM_000794	DRD1	0	0.0813038	0	0.00253752	0	0	0.087642	0	1.02726	0.617669	0	0	0.0188267	Yes
NM_000795	DRD2	3.91057	0.00253417	0.043269	65.8493	0.00724138	0.0171836	0.353024	0.398688	0.553285	11.8866	1.45773	0	0.234725	Yes
NM_000796	DRD3	0	0	0	0.00519984	0	0	0	0	0	0	0	0.0137776	0	Yes
NM_000797	DRD4	0.342598	0.0351538	0.0321548	0.137929	0.0143502	0.0557227	0.483048	0.754808	0.487308	0.674799	0.654066	0.191035	0.732618	Yes
NM_000798	DRD5	0	0	0	0	0	0.0782769	0	0	0	0	0	0.0238659	0	Yes
NM_000799	EPO	0.0140221	0.0411087	0.0219343	0.0513207	0.0146835	0.0285083	0.0056812	0.137144	0.041552	0	0	0.13598	0	Yes
NM_000800	FGF1	0	0.00548801	0.00780862	0.00456754	0.0392048	0.0293192	0	0	0	0.0680696	0	0.0121022	0.0338881	Yes
NM_000801	FKBP1A	177.607	47.4924	117.987	83.767	80.8151	89.3275	75.043	126.064	85.0663	57.6857	108.466	85.4609	53.5707	Yes
NM_000802	FOLR1	0.0788191	14.601	26.7702	0.126208	0.0412682	0.0267078	2.65055	2.87056	5.80266	4.49319	1.99852	0.023886	0.852775	Yes
NM_000803	FOLR2	0	0.175123	0.399539	0	0	0	0	0	0.0305193	0	0.0163852	0	0	Yes
NM_000804	FOLR3	0	0	0	0.0151132	0.0115308	0.00497498	0.0178457	0.0226733	0.0163153	0.183521	0.0218984	0	0.0560648	Yes
NM_000805	GAST	0	0.159535	2.35249	0.027159	0.0621641	0.0536414	0.416902	0.448193	0.425128	2.96815	0.157409	0.191896	0.403003	Yes
NM_000806	GABRA1	0.10881	0.00469114	0	0	0	0	0.00345767	0	0	0.0193953	0	0	0	Yes
NM_000807	GABRA2	14.3928	0	0	0.623328	0.0161669	0.0331323	0	0.0993417	0	0.0175437	1.66563	0	0.0851568	Yes
NM_000808	GABRA3	0	0	0	0	0	0	0	0	0	0	0	0	0	Yes
NM_000809	GABRA4	0	0	0	0.826966	0	0	0	0.0948978	0	0	0.30914	0	0	Yes
NM_000810	GABRA5	0	0	0	0	0	0.00436102	0	0	0	0	0	0	0	Yes
NM_000811	GABRA6	0	0.0108544	0	0	0	0	0	0	0	0.0112193	0	0	0	Yes
NM_000812	GABRB1	0.0590256	0.00618019	0	0.0192886	0.154524	0	0	0.00434061	0	0	0	0	0	Yes
NM_000813	GABRB2	0.0384385	0	0.00200427	0.0662387	0	0	0	0.125316	0.00189842	0	0.0280287	0	0.00434908	Yes
NM_000814	GABRB3	0	0.0011846	0	0.0177464	0	2.15635	0	0.207998	0	0.0661184	0	0	0	Yes
NM_000815	GABRD	0	0	1.55193	0	0	0	0	0.0548075	0.0107559	0.0293302	0.0481221	0.00586652	0	Yes
NM_000816	GABRG2	0.194698	0.00348047	0	0	0	0	0	0	0	0.0683517	0	0	0	Yes
NM_000817	GAD1	1.85801	2.46221	0.901704	0.872114	1.59189	1.95387	1.34916	6.16647	1.33674	11.7885	0.383896	7.71881	2.17048	Yes
NM_000818	GAD2	0	0	0	0	0	0	0	0	0	0	0	0	0	Yes
NM_000819	GART	59.8384	98.1551	69.1225	51.3291	55.8753	88.3859	63.5382	34.742	22.5811	44.8994	66.4434	10.2928	51.3833	Yes
NM_000820	GAS6	0.932263	52.2667	41.7302	97.7467	13.0488	8.32322	195.578	23.7768	65.3006	291.367	137.394	23.5021	24.3759	Yes
NM_000821	GGCX	6.32414	9.10233	10.7777	4.25973	5.01399	6.0787	6.39253	10.2535	5.58002	7.08964	5.96721	4.11528	6.80696	Yes
NM_000823	GHRHR	0	0	0	0.0185028	0	0	0	0.0178447	0	0	0	0	0	Yes
NM_000824	GLRB	0.0152539	0	0	0	0	0	0	0.00628171	0	0	0	0	0	Yes
NM_000825	GNRH1	0.334743	0.242155	0.39442	0.177011	0.218513	0.282832	0.140909	0.281968	0.264091	0.125147	0.164263	0.469011	0.206586	Yes
NM_000826	GRIA2	0.00648858	0	0	0	0	0	0	0	0	0	0	0	0.00825911	Yes
NM_000827	GRIA1	0.00977352	0	0	0	0	0.00367972	0	0.0285093	0	0.01234	0	0	0	Yes
NM_000828	GRIA3	0	0	0	0	0	0	0	0	0	0	0	0	0	Yes
NM_000829	GRIA4	0.00677631	0.00248326	0	0.00310014	0.00532192	0.000765381	0.00137274	0.0069764	0	0.00256673	0.00336898	0.00616064	0.00575024	Yes
NM_000830	GRIK1	0.0893328	0.00211207	0.0112694	0.00131837	0.00603523	0.00390585	0.0140106	0.0207676	0.0192136	0.00873225	0	0.0419181	0.00489071	Yes
NM_000831	GRIK3	0.00202702	0	0	0	0	0.00137371	0	0	0	0	0.0040311	0	0	Yes
NM_000832	GRIN1	0.262179	0.155473	1.34034	0.449252	0.099834	0.178755	0.380476	0.127599	0.736306	0.220283	0.346013	0.436268	0.169893	Yes
NM_000833	GRIN2A	0	0.0185021	0	0	0	0.0543945	0.00104902	0	0	0	0	0	0	Yes
NM_000834	GRIN2B	0	1.1418	0.425415	0.257471	0.238692	0.355117	0.0649655	0.140804	0.0128105	0.0595447	0.196953	0	0.304147	Yes
NM_000835	GRIN2C	0.135681	0.0433061	0.0718879	0.203241	0.14208	0.16907	0.147184	0.128422	0.139426	0.159153	0.426499	0.541163	0.0222843	Yes
NM_000836	GRIN2D	5.14733	0.126291	13.434	10.3672	11.8359	15.8507	8.53654	7.44509	10.6427	1.9497	5.36244	0.202208	10.4251	Yes
NM_000837	GRINA	52.4669	56.4396	80.1075	180.478	85.8337	127.078	47.4381	18.8478	52.2138	110.936	160.03	45.2398	49.883	Yes
NM_000838	GRM1	0.0640987	0.0139939	0.00960006	0	0.0171375	0.00862629	0	0.00842443	0	0.00413264	0.00542434	0.00661276	0	Yes
NM_000839	GRM2	0.0696204	0.0734782	0.0130686	0	0.0145808	0.150981	0.011283	0	0.00825229	0.025316	0.044305	0.121526	0.00945256	Yes
NM_000840	GRM3	0.00219404	0	0.00858015	0	0.00459503	0	0	0.0361412	0.0211303	0	0.0087265	0	0.00744727	Yes
NM_000841	GRM4	0.0433211	0.0141116	0.0225886	0.00440429	0.0126012	0.0163104	0.00585066	0.00743339	0.00178298	0.229728	0.0670071	0.0175045	0.0285922	Yes
NM_000842	GRM5	0	0	0.00830207	0	0	0	0	0	0	0.00357388	0	0	0	Yes
NM_000843	GRM6	0	0	0.00238029	0.00139232	0.0047803	0.0295619	0	0	0	0	0	0	0	Yes
NM_000844	GRM7	0	0.00660092	0.0193713	0	0	0.00508628	0	0	0	0	0	0	0	Yes
NM_000845	GRM8	0.00262252	0.00384422	0	0.0947838	0.170265	0.0272516	0.278385	0.218697	0.0213712	0.0596014	0.0104307	0	0.0489592	Yes
NM_000846	GSTA2	0	0	0	0.331893	0	0	0.0172897	0.073223	0	0	0.183873	0	0.132778	Yes
NM_000847	GSTA3	0	0	0	0.134978	0	0	0	0	0.0301478	0	0	0	0	Yes
NM_000848	GSTM2	25.6562	2.04268	0.133212	7.38825	0.551267	0.283315	1.15429	0.46228	0.0860297	0.480916	3.86437	2.24289	0.157668	Yes
NM_000849	GSTM3	7.74625	37.045	0.00884983	8.86334	6.60207	0.0265829	1.25429	10.1184	0.305122	12.1582	13.7982	0.0109728	15.5586	Yes
NM_000850	GSTM4	24.0978	18.5469	2.08795	70.1226	11.9269	5.20482	21.2564	13.6344	2.04538	5.71598	29.0108	32.4868	4.71898	Yes
NM_000851	GSTM5	5.16626	3.68649	0.222679	12.7892	2.09316	0.806621	3.51824	1.45947	0.180161	1.0245	4.58853	4.29244	0.362396	Yes
NM_000852	GSTP1	475.651	418.752	890.175	625.058	446.488	432.882	1412.47	1329.32	261.896	2309	428.827	1668.29	2.97947	Yes
NM_000853	GSTT1	0.0351541	14.0743	12.4347	17.9244	31.6307	39.5913	0.014243	0.108576	44.8984	25.1133	23.5073	24.7904	28.1157	Yes
NM_000854	GSTT2	12.216	6.13373	16.8816	0.163816	0.558076	35.7862	7.51693	1.65461	37.773	5.86677	0.364324	4.99661	0.197856	Yes
NM_000855	GUCY1A2	0.404474	0	0.004943	0	0.00992695	0.00285532	0	0.0195195	0	0	0	0	0.0107259	Yes
NM_000856	GUCY1A3	0	0	0	0	0.00206864	0	0	0.274563	0	0	0	0	0	Yes
NM_000857	GUCY1B3	0	0	0	0	0	0	0	0.00295316	0	0	0	0	0.00486823	Yes
NM_000858	GUK1	94.8371	81.4589	146.909	190.495	85.1095	93.5193	268.754	96.9829	172.229	101.561	111.474	132.092	92.4282	Yes
NM_000859	HMGCR	36.9896	112.182	47.0716	61.9746	23.8279	66.9108	54.345	9.52308	9.63556	13.9963	55.0926	8.1556	38.1213	Yes
NM_000860	HPGD	6.42747	11.7685	2.11155	1.34615	0.882356	0.257348	8.07875	10.3301	0.569301	0.755784	1.32045	105.806	13.5855	Yes
NM_000861	HRH1	2.75487	4.25134	4.59819	2.71198	2.6181	2.59381	2.81535	1.83546	2.66353	4.29937	2.57045	1.63113	1.55969	Yes
NM_000862	HSD3B1	0.0111161	1.26283	0.0130414	4.07864	0	0	11.863	3.60497	0.905866	0.0926323	0.663193	0	0.235823	Yes
NM_000863	HTR1B	0	0	0	0	0	0	0	0	0	0	0	0	0	Yes
NM_000864	HTR1D	0.0132014	0.307201	0.113577	8.21686	1.38585	1.46276	4.85659	1.48823	0.00977996	0.420035	3.4195	0.0320052	1.73077	Yes
NM_000865	HTR1E	0	0	0	0	0	0	0	0	0	0	0	0	0	Yes
NM_000866	HTR1F	0	0	0	0.00538625	0	0	0	0	0	0	0	0	0.0299717	Yes
NM_000867	HTR2B	0.075347	0.107379	0.0294657	0.0287259	0.140268	0.0548449	0	0.0775719	0.043415	0	0.00832452	0.0202967	0.0284169	Yes
NM_000868	HTR2C	0	0	0	0	0	0	0	0	0	0	0	0	0	Yes
NM_000869	HTR3A	0.829294	0.171042	1.86437	0	0.0174554	0.0753113	0.0101306	0.0257422	0	0.0189419	0	0	0.0141452	Yes
NM_000870	HTR4	1.36307	0	0.00490163	0	0	0	0	0	0	0	0.00623154	0	0	Yes
NM_000871	HTR6	0.216683	0.113931	0.0184212	0.0193954	0	0.225589	0.0152681	0.048496	0	0.0214109	0	0	0.0239834	Yes
NM_000872	HTR7	0	0.0211012	3.56009	0	0	0	0	0.00592811	0	0.0305347	0	0.00697991	0	Yes
NM_000873	ICAM2	0.0538803	15.7453	19.7042	0.552866	1.46696	18.4833	0.77341	2.44866	10.9598	1.80763	4.8524	0.00933046	3.48791	Yes
NM_000874	IFNAR2	7.10552	7.47838	8.6919	7.26745	8.64853	24.6755	6.15833	7.17282	5.78158	5.88219	7.74694	10.0195	14.4643	Yes
NM_000875	IGF1R	9.15285	5.3087	17.7357	2.44576	2.16944	3.88256	2.11984	3.54201	6.79116	2.48293	3.17306	2.44183	4.78257	Yes
NM_000876	IGF2R	16.8228	58.9192	2.62496	21.0959	24.3416	15.1099	19.8834	14.6878	10.8171	35.0471	24.5751	4.63939	25.7995	Yes
NM_000877	IL1R1	0.0475792	1.09637	1.64929	0	5.08196	3.11609	0.143422	0.0254717	0.214308	0.207614	0.00756959	0.306831	0.0226098	Yes
NM_000878	IL2RB	0.0161654	0.0727808	0.0361243	0	0.00483652	0.0761652	0.00561392	0	0	0	0	0.00559874	0.00783865	Yes
NM_000879	IL5	0.0114144	0.0250976	0	0	0.0119527	0	0	0.0235028	0	0	0	0	0	Yes
NM_000880	IL7	0.0269734	0.329491	0.207452	0.0760982	1.22868	0.247793	0.0764998	0.180504	0	0.0136226	0	0.0762929	0.0305188	Yes
NM_000882	IL12A	1.98814	0.719118	0.883518	0	1.51412	0	0.0889206	0.0863931	0	0.0195602	0.0770219	0.837245	0.449163	Yes
NM_000883	IMPDH1	29.1015	16.0067	44.5502	27.4391	23.9846	33.2989	9.31601	22.9354	107.656	37.6114	28.14	42.5858	43.3091	Yes
NM_000884	IMPDH2	319.38	191.336	334.896	272.37	116.12	77.7442	266.406	61.7618	177.905	195.525	267.796	208.244	160.639	Yes
NM_000885	ITGA4	0	0.00449542	0.0215876	0.177484	0.139696	0.0360246	0	0.00947197	0	0	0.137224	0.00557627	0	Yes
NM_000887	ITGAX	0.0100019	0.410516	1.79142	0.0283702	0.00418944	0.969743	0.0243142	0.00617834	0	0.0636471	0.151169	0.00484969	0.00339496	Yes
NM_000888	ITGB6	0.0271635	5.91292	4.36443	5.68812	1.09309	5.47	6.01218	0.311617	1.61276	8.62511	3.45726	0.0611509	2.89777	Yes
NM_000889	ITGB7	0.20486	0.388906	0.903581	2.17099	0.26024	0.186629	6.28904	0.179792	8.13568	3.45497	0.233756	0.293111	0.518671	Yes
NM_000890	KCNJ5	0.00967585	3.00687	0.0050452	0.00295112	0.0270192	0.393438	0	0	0	0	0	0.0273676	0.00547382	Yes
NM_000891	KCNJ2	0.0034743	0.00509281	0.547549	2.05441	0.00363816	0.0392421	1.92144	3.23888	4.34468	0.213191	0.766931	0.00421152	0	Yes
NM_000892	KLKB1	0.00827566	0.0849161	0.0517813	0.0302887	0.108325	0.0056084	0	0.174661	0.00613085	0.0250772	0.0329153	0.230729	0.0140451	Yes
NM_000893	KNG1	0.308516	0	0	0.0397592	0	0.0039264	0	0	0	0.0329182	0.0259243	0	0.988205	Yes
NM_000894	LHB	0.177942	0.234753	0.640203	0.358196	1.99378	1.31846	0.0865142	0.751107	0.0790949	0.350485	0.0707742	2.76097	0.0603993	Yes
NM_000895	LTA4H	145.007	72.9128	133.915	88.5702	82.4074	128.333	77.3544	23.1657	52.787	43.5326	177.828	39.0365	60.6519	Yes
NM_000896	CYP4F3	0.00311888	1.72586	1.55145	4.08944	0.414779	0.00704554	2.28467	0.0931184	0.217193	19.5777	2.62365	0.725892	0.127038	Yes
NM_000898	MAOB	0	0	0	0	0	0	0	0	0	0	0	0	0	Yes
NM_000899	KITLG	1.48987	11.3788	34.2723	6.919	1.63923	5.30123	19.0354	3.41763	6.13543	12.4492	3.77529	20.0035	18.7894	Yes
NM_000900	MGP	0	0.0195721	0.276741	0.012217	0.0139817	0.0573081	0	0.185575	0.133536	0.0606897	0	0.00809261	0.0226605	Yes
NM_000901	NR3C2	0.385039	0.153296	0.0743584	0.193552	0.613923	0.16179	0.382623	0.21207	0.00234772	0.0336104	0.529387	0.159422	0.0484054	Yes
NM_000902	MME	0.00991151	0.0581152	0.00516808	0.0136035	0.00864914	0.013434	0.0187402	19.9135	0.0281472	0.0150171	3.48225	0.444542	0.0168214	Yes
NM_000903	NQO1	7.13966	343.455	22.2436	186.614	213.17	74.1388	159.959	146.201	200.755	139.84	85.0478	65.4319	210.059	Yes
NM_000904	NQO2	0.506375	20.3825	18.0459	29.2571	30.4727	28.0698	39.067	69.8242	11.9015	11.3722	35.8954	24.5134	26.7107	Yes
NM_000905	NPY	0	0	0	0	0	0	0	0	0	0	0	0.0402335	0	Yes
NM_000906	NPR1	0.0600699	0.117404	0.201851	0	0.00232974	0.00201033	0	0.0343576	0	0.0202251	0	0	0.132155	Yes
NM_000908	NPR3	1.85312	0.0460095	0.0274951	0.00344633	0.018406	0.00623958	0	0.0116332	0	0.0779917	0	0.0121753	0.00426158	Yes
NM_000909	NPY1R	0.0537373	0.298866	0.118672	0	0	0	0	0.0195261	0.00468355	0	0.0125725	0	0.00536475	Yes
NM_000910	NPY2R	0	0	0	0	0	0	0	0	0	0	0	0.0062546	0	Yes
NM_000911	OPRD1	0.0105344	0.0154418	0.00823926	0	0.027578	0.0142782	0	0.0813406	0	0	0	0	0	Yes
NM_000912	OPRK1	0	0	0.00295006	0.00431399	0	0.0153369	0	0.198043	0	0.00571476	0	0	0	Yes
NM_000913	OPRL1	3.16824	0.0743575	0.455694	0.00265226	0.956141	8.02398	0.00469768	0.0686378	0.0644223	0.619246	0.011529	2.90234	0	Yes
NM_000914	OPRM1	0	0	0	0	0	0	0	0	0	0	0	0	0	Yes
NM_000915	OXT	0	0.0266408	0	0.0166294	0	0	0	0	0.0134641	0	0	0.154215	0	Yes
NM_000916	OXTR	0.242359	0.235793	0.511635	0.468045	0.202133	0.143413	0.380611	0.0839078	0.71183	0.438693	0.400935	0.626569	0.258441	Yes
NM_000917	P4HA1	21.5723	38.1293	37.2912	70.9198	14.0458	61.8125	11.8922	4.97469	6.17055	9.54168	20.9232	11.8138	20.2491	Yes
NM_000918	P4HB	280.052	316.072	286.538	273.813	283.535	350.487	375.942	375.825	232.405	331.699	236.563	564.4	299.717	Yes
NM_000919	PAM	21.0255	24.628	29.8858	10.9583	17.323	22.3929	66.1097	6.5505	13.5563	19.6875	26.7124	15.5291	16.2257	Yes
NM_000920	PC	12.5448	6.99121	6.78781	2.71006	0.430902	2.962	1.80097	3.60219	1.08333	3.01517	4.92387	2.10797	5.32263	Yes
NM_000921	PDE3A	1.79573	0.144362	0.0110039	0.00468113	0.0415192	0.00173356	0	0.0171181	0.0208456	0.0038757	0.00254354	0.0604657	0.720665	Yes
NM_000922	PDE3B	8.19938	1.03361	0.557496	1.21253	4.41102	5.11797	1.30671	0.591804	0.00454241	0.0673524	3.97513	2.87827	2.84349	Yes
NM_000923	PDE4C	0.0960066	0.0550131	0.249844	0.0463185	0.109674	0.319403	0.0509211	0.0125798	0.0103454	0.190422	0.131913	0.0232757	0.0474003	Yes
NM_000924	PDE1B	0.714926	0	0.0621296	0.00501266	0	0.245036	0	0	0	0	0	0	0	Yes
NM_000925	PDHB	74.9573	35.215	55.6307	45.4423	39.4982	44.4058	62.0865	24.7894	28.6969	45.7451	80.7761	38.4445	50.1458	Yes
NM_000926	PGR	0.00717499	0	0	0	0	0	0	0	0	0	0	0	0	Yes
NM_000927	ABCB1	42.9405	24.1018	4.62068	16.2926	0.0144591	0.329743	33.544	3.43408	0.366793	1.35087	47.0931	0	15.5436	Yes
NM_000928	PLA2G1B	0.0164495	0	0	0	0	0.0520231	0	0.0169352	0	0	0.0327129	0	0	Yes
NM_000929	PLA2G5	0	0	0	0	0	0.024495	0	0.0101487	0	0.0224031	0	0	0	Yes
NM_000930	PLAT	0.0440529	0.822254	43.0024	0.0188105	0.679657	0.122072	0.0642545	0.0786131	0.082677	2.33164	0.0467239	0.0783209	0.36884	Yes
NM_000932	PLCB3	17.252	16.3001	13.4348	29.0815	21.1392	22.0219	23.1338	15.2565	36.1533	25.9171	59.3218	13.3928	16.2298	Yes
NM_000933	PLCB4	9.41481	5.5465	7.08517	23.8244	2.55026	2.77797	0.338664	1.40594	5.81018	0.729645	1.32368	0.371106	12.7851	Yes
NM_000934	SERPINF2	0.114243	0.0807412	3.76879	0.162398	4.13582	0.798187	1.69277	2.49935	0.202518	4.38912	0.860089	0.118701	0.069246	Yes
NM_000935	PLOD2	20.433	48.1345	14.942	24.6366	1.09608	15.2245	0.266352	1.48322	0.0293594	0.074173	24.0749	0.0904277	7.36685	Yes
NM_000936	PNLIP	0	0	0	0	0	0	0	0	0	0	0	0	0	Yes
NM_000937	POLR2A	42.731	52.5424	57.1756	41.3988	106.049	61.7156	44.0819	24.4457	32.3214	41.1017	28.6177	34.5774	27.7419	Yes
NM_000938	POLR2B	41.8201	34.3437	60.2197	42.6414	66.0107	74.2679	37.512	18.5725	26.6333	26.904	28.0512	26.0987	27.4757	Yes
NM_000939	POMC	0	0	0	0	0	0	0	0	0	0	0	0.0181824	0	Yes
NM_000940	PON3	0	0.828918	2.19007	1.57723	15.8453	27.3247	2.94528	0.0883314	3.69235	0.472706	0.201648	0.0850938	10.8415	Yes
NM_000941	POR	50.446	91.8805	106.959	46.3689	55.0816	87.0312	83.0485	57.7901	161.905	88.4984	51.0968	75.1487	115.383	Yes
NM_000942	PPIB	348.178	681.97	335.62	512.48	349.475	279.682	590.365	660.986	894.679	376.412	256.014	1109.48	744.274	Yes
NM_000943	PPIC	11.7431	37.4011	14.6825	12.9739	20.0131	16.9865	45.5248	18.0532	5.1963	10.9473	16.6788	12.0041	26.0228	Yes
NM_000944	PPP3CA	13.7583	16.7054	21.1735	8.29845	4.56205	4.31078	8.3574	7.2117	18.537	7.68625	7.04063	10.5766	6.15079	Yes
NM_000945	PPP3R1	65.354	38.8453	35.5547	30.6188	39.8838	40.0727	22.2278	14.7752	13.6979	28.1179	21.2172	12.9441	27.6948	Yes
NM_000946	PRIM1	36.7284	21.6172	18.6762	27.8436	21.37	16.2957	16.7423	8.63007	11.0897	11.393	18.7903	12.2843	18.8251	Yes
NM_000947	PRIM2	11.0467	13.9231	12.9425	9.83739	18.0706	13.7135	10.4405	6.14163	7.19662	11.3474	8.10345	11.4595	12.4065	Yes
NM_000948	PRL	0	0	0	0	0	0	0	0	0	0	0	0	0	Yes
NM_000949	PRLR	0.00633112	0.243612	0	5.1253	0.280105	0.0146595	0.098757	1.36309	0.300178	0.0779383	6.37084	0.00767454	0.787066	Yes
NM_000950	PRRG1	0	0	0	0	0	0	0	0	0	0	0	0	0	Yes
NM_000951	PRRG2	0.327592	6.01231	6.93886	4.2576	5.04762	3.58536	7.07517	8.12878	5.78988	11.2943	3.74932	6.65353	5.11725	Yes
NM_000952	PTAFR	0.0594761	0.184053	4.54155	0.50893	1.23178	0.104499	0.458742	0.242661	0.487941	0.760957	0.0876141	0.0427238	0.609381	Yes
NM_000953	PTGDR	0	0.00466033	0	0	0	0.00718195	0	0.0065463	0	0.0144509	0	0	0	Yes
NM_000954	PTGDS	0.125711	0.0586326	1.4659	0.271877	0.0718037	12.5571	0.601937	0.0588287	0.77891	0.190467	0	0.0554132	0.349121	Yes
NM_000955	PTGER1	0.052583	0.00963484	0.0257043	0.0150354	0.419855	0.222721	0.0266306	0	0.0243469	0.159339	0.117642	0.095611	0.0223104	Yes
NM_000956	PTGER2	0.0641597	3.75641	0.475247	0.545618	0.430779	2.02911	0.0458734	0.0621687	16.7227	48.5991	0.0675494	5.32065	0.217779	Yes
NM_000958	PTGER4	4.75243	0.688208	0.477476	4.09045	0.86574	3.05498	0.798592	2.67467	0.05273	0.253013	2.23211	0.361713	0.752669	Yes
NM_000959	PTGFR	0.0401407	0	0	0	0	0	0	0	0	0	0	0	0	Yes
NM_000960	PTGIR	0	0	0.00700869	0	0.0140755	0.00404857	0	0.00922561	0	0.027154	0	0	0.0152083	Yes
NM_000961	PTGIS	0.0150077	0	0	0	0	0	0	0	0	0.00252649	0.0132647	0	0.00283004	Yes
NM_000962	PTGS1	0.0256734	0.0967713	0.798896	0.0260079	0.263081	2.57833	0.0356634	0.200124	0.0217366	0.394539	0.0437624	0.033344	0.0964804	Yes
NM_000963	PTGS2	0.0187071	1.84335	79.203	0.115063	0.988174	0.807619	1.32554	0.177615	1.52908	0.598362	0.0165344	0.0176373	0	Yes
NM_000964	RARA	10.744	4.05393	14.7923	8.7839	8.70292	8.42151	6.0597	6.77427	7.58675	10.5681	8.3148	9.02362	5.72594	Yes
NM_000965	RARB	6.16539	0.0403662	0.157946	0.0601925	0.0352446	0.0345598	0.0818194	0.063002	0.0566688	0.31524	0.103443	0.0890161	0.0675075	Yes
NM_000966	RARG	22.9828	21.0755	20.0978	2.79909	14.0845	11.0796	15.9204	1.45012	31.5745	12.4329	2.03831	18.7433	10.1489	Yes
NM_000967	RPL3	597.769	310.879	547.843	610.608	340.643	587.355	753.748	173.15	548.655	371.888	674.468	710.411	285.164	Yes
NM_000968	RPL4	370.74	247.707	339.602	488.584	265.362	249.521	416.777	227.137	385.766	289.292	269.365	549.3	313.442	Yes
NM_000969	RPL5	673.66	322.156	477.381	565.468	330.949	334.049	521.623	383.248	399.415	246.226	643.487	588.324	319.596	Yes
NM_000970	RPL6	426.284	195.956	274.084	467.846	253.352	321.018	371.399	178.454	305.117	240.18	450	324.413	367.256	Yes
NM_000971	RPL7	209.264	188.764	249.038	975.946	307.286	285.284	316.37	228.071	294.152	116.054	621.263	239.715	155.952	Yes
NM_000972	RPL7A	813.956	328.119	614.073	1201.74	359.316	696.865	1163.82	381.304	481.897	552.529	766.599	765.39	763.348	Yes
NM_000973	RPL8	1408.42	1000.85	1681.46	4483.66	1881.11	1887.23	1553.08	687.393	3996.47	1597.29	2980.59	1800	1281.13	Yes
NM_000975	RPL11	1253.02	599.833	866.768	1479.09	435.771	849.057	1222.24	1234.06	1186.95	588.541	1447.88	1624	799.91	Yes
NM_000976	RPL12	360.05	265.01	372.164	490.859	183.74	361.395	489.871	318.816	189.422	362.247	354.97	644.502	295.671	Yes
NM_000977	RPL13	189.099	72.9141	67.4972	225.248	75.007	101.648	163.125	123.217	73.1263	110.327	164.713	136.538	72.0486	Yes
NM_000978	RPL23	698.831	268.637	572.917	426.184	287.266	382.722	490.198	500.235	504.192	425.167	431.248	701.571	364.537	Yes
NM_000979	RPL18	1080.2	638.976	1202.55	1417.93	696.687	1190.79	1605.39	1298.63	2359.03	1529.36	855.939	1939.68	1127.71	Yes
NM_000980	RPL18A	237.84	110.608	259.828	281.414	123.608	188.372	266.866	81.9459	224.047	158.11	241.798	261.738	166.372	Yes
NM_000981	RPL19	434.557	224.726	331.777	318.585	288.976	278.93	359.437	289.084	656.305	379.759	347.429	550.043	286.404	Yes
NM_000982	RPL21	113.479	35.1875	29.5511	149.221	39.9759	39.6998	107.892	153.926	114.314	51.1712	94.0769	79.0837	49.599	Yes
NM_000983	RPL22	100.108	54.9687	96.338	212.472	56.2971	94.0706	177.448	135.326	88.054	72.2703	251.342	74.2612	79.6837	Yes
NM_000984	RPL23A	300.55	112.553	164.799	225.013	117.795	149.398	194.643	108.706	163.372	148.633	216.624	121.86	88.4022	Yes
NM_000985	RPL17	101.78	90.9057	204.35	143.763	81.6329	105.169	145.425	84.1524	417.755	83.3765	97.1362	209.15	43.1843	Yes
NM_000986	RPL24	177.539	87.0666	90.8499	116.083	105.639	120.437	103.952	136.229	77.5313	155.893	116.761	232.71	146.461	Yes
NM_000987	RPL26	335.61	204.559	405.718	620.22	237.269	367.77	469.897	393.125	371.11	206.232	333.044	508.375	234.128	Yes
NM_000988	RPL27	1126.48	511.008	702.48	761.663	493.327	419.764	767.542	711.265	1320.27	585.668	786.736	702.823	1038.94	Yes
NM_000989	RPL30	1017.17	581.837	993.281	3639.05	1031.81	1404.71	993.096	614.99	1587.35	888.695	2616	765.266	1026.87	Yes
NM_000990	RPL27A	93.684	47.2897	58.0175	62.7598	31.0311	44.1463	67.1369	73.4845	102.83	56.655	105.386	106.626	83.4322	Yes
NM_000991	RPL28	141.343	71.3004	225.25	179.447	106.447	245.553	208.649	146.963	235.657	263.116	199.986	283.234	206.094	Yes
NM_000992	RPL29	601.971	355.827	543.105	598.038	414.637	525.627	731.803	295.633	643.403	325.376	759.857	1167.16	695.191	Yes
NM_000993	RPL31	692.605	296.682	578.955	504.381	242.982	408.643	507.815	622.247	814.405	475.817	498.569	667.122	567.89	Yes
NM_000994	RPL32	112.481	60.6251	164.835	97.9339	77.5509	87.2933	124.966	140.973	124.988	114.769	147.413	159.603	95.2046	Yes
NM_000995	RPL34	130.037	69.5445	148.153	140.823	75.085	145.817	162.973	160.206	148.646	69.797	111.948	209.186	109.341	Yes
NM_000996	RPL35A	722.39	390.599	510.61	676.918	430.008	665.211	658.631	638.099	652.093	667.59	918.056	391.85	812.871	Yes
NM_000997	RPL37	151.011	84.1462	160.806	172.012	101.854	193.135	291.537	988.158	299.598	199.473	219.106	280.575	128.897	Yes
NM_000998	RPL37A	753.062	498.261	1006.48	1155.26	616.106	992.289	1066.33	1141.68	2080.56	1028.03	1173.19	1204.97	973.165	Yes
NM_000999	RPL38	1209.84	447.888	742.384	807.801	568.791	999.376	869.131	817.665	3277.35	734.385	834.05	1199.66	787.569	Yes
NM_001000	RPL39	0	0	0	0	0	0	0	0	0	0	0	0	0	Yes
NM_001001	RPL36AL	245.748	196.23	395.758	214.716	257.749	396.992	326.405	363.636	1313.14	308.062	302.507	725.484	457.452	Yes
NM_001001132	ITSN1	7.03651	5.91333	7.24565	2.06707	7.75175	10.8567	3.12193	2.77583	3.53353	4.40132	3.13006	2.18788	4.86626	Yes
NM_001001290	SLC2A9	0	0.514227	2.68149	0.575951	0.963968	0.310242	0.120963	0.107581	0.353888	1.62846	1.00935	0	1.13163	Yes
NM_001001317	TRYX3	0	0	0	0.0139028	0	0	0	0.0208575	0	0	0	0	0	No
NM_001001323	ATP2B1	24.238	64.8633	13.5832	8.86771	14.5834	10.9221	6.61154	7.91234	6.01365	3.9297	13.726	5.69413	10.3981	Yes
NM_001001325	SPINK14	0	0	0	0.0143694	0	0.0283808	0	0	0.604979	0	0	0	0	No
NM_001001329	PRKCSH	138.554	211.893	174.71	149.201	179.021	234.27	189.67	180.778	316.257	203.44	239.665	309.647	162.377	Yes
NM_001001330	REEP3	4.50124	16.4967	24.5499	3.84589	16.0922	12.6083	6.67655	7.37176	10.5107	10.253	4.86675	5.86336	13.2858	Yes
NM_001001331	ATP2B2	0.00208342	0	0.0146656	0.00142974	0.00436336	0.00188257	0	0.00214494	0	0.00631326	0.00414327	0.00505102	0.0035359	Yes
NM_001001342	BLOC1S2	9.37362	14.4777	13.8578	15.4053	27.7797	16.7565	16.7096	9.80245	13.3312	12.2652	12.9414	21.2035	19.1278	Yes
NM_001001343	FNDC9	0	0	0	0	0.0230291	0.021859	0.0071282	0	0	0.0199923	0.008747	0	0	No
NM_001001344	ATP2B3	0	0	0	0	0	0	0	0	0	0	0	0	0	Yes
NM_001001346	CLDN20	0.0618317	0.152948	0.0785859	0.0919354	0.0647478	0.0419032	0.0563664	0.0238715	0.0572584	0.0351309	0.292039	0.018738	0.091821	Yes
NM_001001349	NKIRAS2	21.5666	8.74005	15.897	11.5473	7.46778	9.00596	13.8233	10.757	11.2104	15.3857	12.0872	8.33136	13.3461	Yes
NM_001001389	CD44	24.9983	16.3774	46.573	39.1146	63.9537	246.208	39.3633	30.1515	61.0783	43.1945	53.0455	18.3694	121.992	Yes
NM_001001390	CD44	28.0531	18.1666	45.6771	42.5465	63.6794	255.843	42.527	33.336	65.2839	45.9405	57.4985	19.8422	130.45	Yes
NM_001001391	CD44	30.3409	18.3227	42.7803	39.3451	60.0095	243.612	41.4421	34.0807	64.585	45.6987	54.5454	20.0169	119.521	Yes
NM_001001392	CD44	24.8471	13.6699	31.2834	31.5922	45.8903	196.114	37.5765	31.4454	57.0671	36.3863	47.539	18.4538	92.7793	Yes
NM_001001394	DNAJB3	0	0.0974587	0.0404452	0.0608344	0	0	0	0.0608439	0.0656732	0	0.0734555	0	0	Yes
NM_001001395	LMO3	0	0.00383348	0.00204543	0.0167502	0.0136927	0.0555324	0.00423828	0.0269241	0.154993	0.00396233	0.0364055	0.0475517	0.0088768	Yes
NM_001001396	ATP2B4	0.142354	4.57922	5.5678	1.06501	6.48774	7.39437	1.40373	1.43109	3.98499	0.942028	1.07202	1.51244	0.934413	Yes
NM_001001410	C16orf42	60.7844	24.1064	38.5752	31.8501	33.8668	28.4164	38.3608	63.1765	51.7872	52.4	27.8435	40.9857	57.6718	No
NM_001001411	ZNF676	0.0159342	0	0.00249254	0.00291595	0.0100114	0.0403148	0	0	0	0.0193138	0.0190129	0.00772615	0.00540859	Yes
NM_001001412	CALHM1	0.0214252	0.0179464	0	0	0.0128204	0.00829705	0.00496037	0	0	0.046374	0	0.0296817	0	Yes
NM_001001413	GOLGA6L1	0.14659	0	0	0.0491806	0	0.00772674	0	0	0	0	0.00971737	0.0266543	0	Yes
NM_001001414	NCCRP1	0.0331068	0.103992	0.540073	0.0324563	0	0.0128208	0.0459893	0.0292152	0.0105114	0.107487	0.103461	0.0229325	0.184616	Yes
NM_001001415	ZNF429	1.00919	0.0232051	0.798609	0	1.07751	2.81617	1.02622	0.00407448	0.00293192	0.149907	2.30604	0.00959479	0.698538	Yes
NM_001001417	TBC1D3B	3.77822	3.69435	2.88626	2.5455	1.32648	1.78648	2.93682	6.1041	1.74327	3.29206	3.00022	9.88496	1.99309	Yes
NM_001001418	TBC1D3C	3.77644	3.52506	2.84021	2.51815	1.79083	1.82139	2.94613	6.69868	2.04209	3.4637	2.76275	10.1361	2.33537	Yes
NM_001001419	SMAD5	8.68124	12.484	11.4704	6.85047	14.1085	5.83891	11.8901	2.16623	3.89061	5.48363	14.9428	3.26928	6.20285	Yes
NM_001001420	SMAD5	8.83132	12.649	11.7216	6.9532	14.303	5.92741	12.0719	2.21508	3.97284	5.58423	15.2115	3.33855	6.29864	Yes
NM_001001430	TNNT2	0	0.137439	0.337971	0.193961	0.0768387	0.335204	0.614416	0.671509	0.0664407	0.71647	0.178354	1.78885	0.166046	Yes
NM_001001431	TNNT2	0	0.138647	0.334508	0.195666	0.0775139	0.33815	0.619815	0.677409	0.0670245	0.722766	0.179921	1.7946	0.167505	Yes
NM_001001432	TNNT2	0	0.121631	0.337474	0.1974	0.0782011	0.337399	0.611863	0.632159	0.0614715	0.70403	0.181516	1.77027	0.16899	Yes
NM_001001433	STX16	13.1105	15.1951	8.27243	22.7459	13.7386	24.6585	11.1678	7.63959	12.6556	39.7278	32.1586	11.5944	10.6975	Yes
NM_001001435	CCL4L1	0	0	0	0	0	0.00319874	0	0	0	0.117998	0	0	0.672891	No
NM_001001436	C16orf87	14.7179	6.15769	6.07497	4.55992	5.54012	4.44215	2.99658	1.49371	3.02956	3.43538	3.8113	3.71378	7.06637	Yes
NM_001001437	CCL3L3	0	0	0	0	0	0.013606	0	0	0.0446203	0.155135	0	0	1.97285	Yes
NM_001001438	LSS	39.349	24.3322	23.407	21.6375	23.3424	77.3663	33.9217	4.35135	2.43392	17.4196	25.9014	2.17723	18.2546	Yes
NM_001001479	SLC35E4	0.26122	1.69073	2.93514	4.62376	3.75636	7.41192	4.92808	0.73862	14.8983	11.2045	2.46572	15.5024	4.40834	Yes
NM_001001480	KRTAP5-5	0.00829767	0.0304078	0.0259595	0.0759232	0	0.00374888	0.141199	0.0427134	0.00614715	0.0251439	0.544547	0.0100584	0.0563299	Yes
NM_001001481	UBE2W	2.12596	5.08821	5.50581	8.72183	10.8816	12.7541	2.61312	2.06013	3.00941	4.68617	6.75813	3.45479	2.38707	Yes
NM_001001483	ZDHHC13	11.7403	15.7	8.82981	11.2943	22.0825	12.6366	12.8942	11.2004	8.75476	13.6395	13.1281	9.78973	18.1671	Yes
NM_001001484	PTER	1.97839	13.0049	14.3502	8.19105	14.7805	16.2404	9.47103	2.44265	1.0787	3.17294	5.10539	2.60724	7.71463	Yes
NM_001001485	ATP2C1	38.2946	169.726	56.4275	32.9455	45.0329	54.4427	21.0161	7.98609	22.2055	37.3094	34.9506	15.8994	30.3225	Yes
NM_001001486	ATP2C1	42.6717	185.995	62.7529	36.0486	49.3344	60.0823	23.6426	10.1998	27.3599	41.6577	38.8392	20.034	34.616	Yes
NM_001001487	ATP2C1	42.7596	186.758	62.9356	36.2235	49.5674	60.3866	23.6698	10.0942	27.0886	41.7841	38.8797	19.826	34.6086	Yes
NM_001001502	SNCB	0.167024	0.0188332	0.115562	0	0	0.00580471	0.010411	0	0.0142773	0.0973313	0	0.00778713	0.0327077	Yes
NM_001001503	NDUFV3	27.8719	9.20616	27.4345	12.904	12.7567	18.4304	23.8638	62.4772	23.621	18.2934	17.5915	29.3374	18.5784	Yes
NM_001001520	HDGFRP2	53.0642	34.9518	39.2749	23.6802	53.8729	33.159	28.9486	29.1363	50.4786	31.9534	27.2082	55.9097	38.0121	No
NM_001001521	UGP2	70.9922	108.389	40.553	53.4653	24.0365	26.5023	40.4954	26.7514	30.3926	39.5763	41.578	11.5276	49.9008	Yes
NM_001001522	TAGLN	1.21641	1.64693	3.33691	1.20622	1.24868	1.66496	10.3521	9.01924	4.16838	38.8575	1.71598	6.39929	10.9527	Yes
NM_001001523	RORC	0	0.0202692	0.896447	0.648074	0.0257418	0.00694145	0.794296	0.0885792	0.0386992	0.228128	2.78043	0.0148993	0.0990858	Yes
NM_001001524	TM6SF2	0	0	0.00980654	0.283942	0	0.0481503	0	0.0129084	0	0.0284953	2.56826	0.0303974	0	Yes
NM_001001547	CD36	81.6718	0.0131987	0.165497	0.00823871	0	0.128143	0.817175	1.0336	0	2.26462	0.0447658	317.989	0.0993292	Yes
NM_001001548	CD36	58.6515	0.00867989	0.142027	0.0117391	0	0.0650986	0.457432	0.806738	0.00146225	1.25902	0.0314021	301.722	0.0636473	Yes
NM_001001549	GRB10	7.1046	21.3975	3.08992	15.7162	21.0399	24.5464	4.7655	2.22712	0.24213	3.81301	8.90464	11.3681	11.8254	Yes
NM_001001550	GRB10	6.99497	21.2959	3.05571	15.53	20.8049	24.341	4.67134	2.1717	0.248416	3.76313	8.75046	11.0079	11.7061	Yes
NM_001001551	C9orf103	0.923472	1.17036	1.18122	8.26928	2.20603	3.38125	10.1801	8.6656	2.35884	2.66717	3.59647	8.55894	2.20399	No
NM_001001552	LEMD1	0	0	1.27198	4.47458	0.0119091	0.272324	13.3257	1.4987	0.631895	2.15388	0.63327	13.5792	0.42463	Yes
NM_001001555	GRB10	6.70515	20.3273	2.95056	14.8893	20.047	23.3296	4.45691	2.06121	0.236214	3.57829	8.38332	10.4987	11.2067	Yes
NM_001001556	GALK2	9.54883	7.18191	3.61252	17.1921	7.83975	7.58491	15.4752	8.89352	4.96455	6.25329	6.43784	4.73507	13.6982	Yes
NM_001001557	GDF6	0.164295	0	0	0	0	0	0	0	0	0.00765929	0	0	0	Yes
NM_001001560	GGA1	26.0847	13.5811	22.5596	11.1695	24.8293	18.9683	17.9798	17.2915	11.1196	13.8697	13.9826	14.5152	12.4344	Yes
NM_001001561	GGA1	5.79466	3.80756	4.57057	2.41911	5.59417	3.97506	3.01698	1.03264	1.38114	2.65949	2.79692	1.51983	1.85032	Yes
NM_001001563	TIMM50	51.9299	27.6897	49.2488	30.2066	35.2509	29.1018	33.9698	19.1156	34.7129	33.2376	30.3021	35.3992	40.4659	Yes
NM_001001567	PDE9A	6.03777	5.26331	0.281412	0.220981	3.19997	32.9458	2.12475	5.37371	3.00875	18.617	1.85254	5.4429	13.0409	Yes
NM_001001568	PDE9A	6.05065	5.29414	0.28897	0.232721	3.25772	32.9493	2.074	5.69459	3.16948	18.9028	1.84219	5.73134	13.6586	Yes
NM_001001569	PDE9A	6.00198	5.2342	0.281228	0.240423	3.17439	32.9101	2.07092	5.79764	3.20062	18.816	1.82616	5.87409	13.7914	Yes
NM_001001570	PDE9A	5.75724	4.99852	0.266896	0.218564	2.99651	31.612	2.03831	5.23966	2.91444	17.7929	1.76442	5.342	12.6336	Yes
NM_001001571	PDE9A	6.10665	5.29426	0.284489	0.227346	3.24025	33.2165	2.12131	5.53802	3.08936	18.9082	1.89498	5.60151	13.3723	Yes
NM_001001572	PDE9A	5.94123	5.22456	0.288009	0.233842	3.19417	32.3673	2.04864	5.77716	3.21252	18.6612	1.75971	5.78285	13.7956	Yes
NM_001001573	PDE9A	5.56916	5.10131	0.291424	0.218195	2.98094	30.5708	1.90818	5.30909	2.97749	17.4705	1.65981	5.29352	12.8581	Yes
NM_001001574	PDE9A	5.981	5.26185	0.285583	0.225867	3.21501	32.6774	2.07946	5.51696	3.0822	18.5991	1.8	5.56071	13.3015	Yes
NM_001001575	PDE9A	5.88751	5.16063	0.280022	0.241793	3.10639	32.3073	2.04461	5.88583	3.24597	18.5638	1.74044	5.93125	13.9368	Yes
NM_001001576	PDE9A	5.99119	5.21976	0.278054	0.245299	3.03923	32.8477	2.11098	5.98209	3.25544	18.711	1.88918	6.01909	13.9761	Yes
NM_001001577	PDE9A	5.95425	5.16687	0.275688	0.235687	3.09482	32.6195	2.09604	5.71134	3.15766	18.5851	1.80097	5.78467	13.621	Yes
NM_001001578	PDE9A	6.06192	5.237	0.27695	0.234535	3.16007	33.1875	2.11987	5.63152	3.11658	18.8255	1.88133	5.73378	13.4902	Yes
NM_001001579	PDE9A	5.9321	5.20334	0.278049	0.233038	3.13372	32.6312	2.07668	5.61016	3.10929	18.5063	1.78328	5.69222	13.4176	Yes
NM_001001580	PDE9A	5.87009	5.14171	0.276691	0.246884	2.96359	32.2099	2.08438	6.08047	3.30486	18.4419	1.80055	6.08358	14.1347	Yes
NM_001001581	PDE9A	5.677	5.16723	0.292216	0.217544	3.04351	31.14	1.93444	5.24518	2.94398	17.7173	1.73689	5.25826	12.7558	Yes
NM_001001582	PDE9A	5.74265	5.17234	0.288011	0.21325	3.03603	31.4544	1.98298	5.1204	2.87995	17.7688	1.78906	5.15874	12.5308	Yes
NM_001001583	PDE9A	5.62709	5.14244	0.289018	0.211856	3.01236	30.9579	1.94443	5.09979	2.8727	17.4837	1.7023	5.12009	12.4635	Yes
NM_001001584	PDE9A	5.78586	5.06245	0.276324	0.222536	3.11515	31.5073	1.98323	5.44537	3.03078	18.0756	1.76157	5.48051	13.0608	Yes
NM_001001585	PDE9A	5.69162	5.11689	0.281272	0.219368	2.95743	31.3775	1.9777	5.19325	2.89864	17.6611	1.77363	5.26605	12.6136	Yes
NM_001001655	ALKBH2	40.6095	5.17601	24.525	13.9422	22.0457	33.3551	10.1534	4.7218	14.4618	12.7644	7.86341	62.0513	17.6534	Yes
NM_001001656	OR9A4	0	0.0145032	0	0	0	0.00894024	0	0.0203724	0	0	0	0	0	Yes
NM_001001657	OR2Y1	0	0	0	0	0	0	0	0	0	0	0	0	0	Yes
NM_001001658	OR9A2	0	0	0	0	0	0.00452755	0	0	0	0	0	0.0242952	0	Yes
NM_001001659	OR2A14	0	0.0146895	0	0	0	0.0181102	0	0	0	0	0	0	0	Yes
NM_001001660	LYRM5	8.81694	6.56463	4.81177	5.23406	4.29772	11.4711	10.3303	10.0257	8.42681	3.67614	8.16186	3.7188	10.1201	Yes
NM_001001661	ZNF425	0.505463	0.551441	0.520302	0.309659	1.13769	1.86369	0.338968	0.334962	1.93472	1.26319	0.248413	1.16205	0.497948	Yes
NM_001001662	ZNF782	2.14606	1.02724	0.460983	1.2992	1.07491	0.987426	0.795232	0.583569	0.323823	1.28182	1.36279	0.926401	0.569544	Yes
NM_001001663	TMEM211	0	0.080706	0.244019	0.117547	0	0.0663331	24.8055	17.4773	194.736	0.417093	0	0.0222468	0.872119	Yes
NM_001001664	SPOPL	1.6846	7.4881	3.94763	4.4617	8.92771	5.98868	3.30968	1.80479	2.56238	5.69962	3.67413	1.94528	2.49681	Yes
NM_001001665	CYP27C1	19.3817	0	0.00155989	0	0	0.000901072	0	0.0020533	0	0.0151089	0	0.00483522	0.00676967	Yes
NM_001001666	ANO7	0	0	0	0.0287066	0	0	0.042371	0.0215333	0	0.0316898	0.0207973	0	0.0354973	Yes
NM_001001667	OR6V1	0	0	0	0	0	0	0	0.0204372	0	0	0	0	0	Yes
NM_001001668	ZNF470	0.974349	0.030715	0	0	0.00137137	0.000591679	0	0	0.0708243	0.761938	0.825594	0	0.657894	Yes
NM_001001669	ARHGEF37	0.0326191	1.29381	2.38617	0.374835	0.759503	1.44425	2.08657	0.724983	0.764757	2.25887	2.88095	2.0189	1.01602	No
NM_001001670	FAM75D1	0	0	0	0	0	0.00349699	0	0	0	0.00586362	0	0	0	No
NM_001001671	MAP3K15	0	0	0	0	0	0	0	0	0	0	0	0	0	Yes
NM_001001673	RNASE9	0	0	0	0	0	0	0	0	0	0	0	0.0107953	0	Yes
NM_001001674	OR4F15	0	0	0	0	0	0	0	0	0	0	0	0	0	Yes
NM_001001676	LCN9	0	0	0	0	0	0	0	0	0	0	0	0	0	Yes
NM_001001683	MED11	11.8317	13.0283	14.9136	13.5453	7.6833	12.2648	20.7592	18.6823	16.8314	9.46546	11.843	18.7281	11.8995	Yes
NM_001001694	IL17REL	0	0.00375891	0.022062	0.00586585	0	0.00347567	0.00415584	0	0	0	0	0	0	Yes
NM_001001701	C4orf3	16.8153	16.2385	23.9381	28.7988	26.8334	33.6602	18.0387	14.9579	10.207	12.7636	13.0643	6.97284	11.8537	Yes
NM_001001709	C9orf170	0	0	0	0	0	0	0	0	0	0	0	0	0	Yes
NM_001001710	FAM166A	33.0116	30.4242	46.1371	34.0559	32.4107	27.455	57.0406	83.1725	80.3448	44.8005	23.8307	35.0507	59.3125	Yes
NM_001001711	DDI1	0	0	0	0	0	0	0	0	0	0	0	0	0	Yes
NM_001001712	LCN10	0.00925336	0.00339101	0.734591	0.0190502	0.0387591	0.418065	0	0.00952659	0.0137103	0.0140199	0.018402	0.0168253	0.0157044	Yes
NM_001001713	SH3BGR	1.86264	2.79178	2.06142	0.933107	1.37509	4.30026	1.20747	2.34911	0.241482	0.67731	1.70393	2.57398	0.600628	Yes
NM_001001715	FARP1	5.05456	2.69426	0.669026	0.0291077	1.99874	2.34433	0	0.574967	0.953162	0.814025	1.65892	0.214234	0.899831	Yes
NM_001001722	CDY2B	0	0	0	0	0	0	0	0	0	0	0	0	0	No
NM_001001732	CC2D2B	0.0303069	0.0259148	0.011852	0.106301	0.0793406	0.022821	0.0327443	0.0208012	0.0112261	0.0229593	0.0502256	0.0551066	0.0171452	Yes
NM_001001734	ATP1A4	0	0	0	0	0	0	0	0	0	0	0	0	0	Yes
NM_001001740	RFWD2	13.5667	23.2701	9.04782	17.5044	13.7347	13.2519	22.3212	7.09697	18.5442	12.6229	17.1908	4.49497	20.6955	Yes
NM_001001786	BLID	0	0.0317961	0.00848271	0	0.295285	0.0392003	0	0	0	0	0	0.105176	0	Yes
NM_001001788	RAET1G	0.0841706	1.84455	3.92362	0.223345	1.0665	4.24394	0.607025	0.450611	0.193304	0.841688	0.451949	0.714217	1.15709	Yes
NM_001001790	TOMM5	112.305	53.7795	87.7882	78.8805	82.4847	175.662	155.46	280.35	230.305	100.88	60.345	81.4383	79.7012	Yes
NM_001001791	C10orf55	0.05204	2.29666	0.197696	1.96247	127.914	46.3263	2.70484	0.0153076	1.21992	9.27014	4.16182	0.247824	2.81994	Yes
NM_001001794	FAM116B	1.97729	1.4729	8.83817	0.460756	1.3207	6.8983	1.64716	6.42568	3.61759	1.84789	1.49754	12.3875	1.2937	No
NM_001001795	C8orf82	9.06471	8.58653	13.0938	34.3783	19.106	17.9923	11.9665	9.84033	20.5762	15.6689	22.9039	36.5178	7.4869	No
NM_001001802	OR2A42	0	0.15424	0.062703	0.00458466	0.146913	0.0588582	0.0324814	0	0.0668158	0.227749	0	0.0485903	0	Yes
NM_001001821	OR2T34	0.0195402	0	0	0	0	0	0	0	0	0	0	0	0	Yes
NM_001001824	OR2T27	0	0	0	0	0	0	0	0	0	0	0	0	0	Yes
NM_001001827	OR2T35	0	0	0	0	0	0	0	0	0	0	0	0	0	Yes
NM_001001850	STX19	0	0.183644	0.366661	3.43157	0.0507834	0.171632	4.98423	1.93056	0.431129	0.0734776	5.43299	0.734834	1.46779	Yes
NM_001001851	ITIH5	0	0	0.00465686	0.0122578	0	0.00269003	0	0	0	0.347312	0.0118407	0	0	Yes
NM_001001852	PIM3	24.3943	17.7469	66.3548	17.2629	27.7228	29.7235	27.9494	33.6316	22.9127	23.552	17.5444	33.5523	19.1286	Yes
NM_001001872	C14orf37	1.75382	0.0599418	0.421703	0.515511	1.75724	1.65454	0.115362	0.190228	0.00673203	0.142271	0.138548	0.157887	0.0102816	Yes
NM_001001874	TPD52L3	0	0	0	0.00555752	0	0	0	0	0	0	0	0	0	Yes
NM_001001875	TPD52L3	0	0	0	0	0	0	0	0	0	0	0	0	0	Yes
NM_001001877	HSFY2	0	0	0	0	0	0	0	0	0	0	0	0	0	No
NM_001001888	VCX3B	0	0	0	0	0	0	0	0	0	0	0	0	0	Yes
NM_001001890	RUNX1	2.8825	5.63878	9.42122	6.41722	14.201	5.92023	6.29568	6.6553	11.1868	21.7139	2.61562	0.701323	2.38712	Yes
NM_001001891	ANO7	0.311016	0.925019	0.73858	0.325821	0.323324	0.896047	0.136969	0.257552	0.308882	0.454153	0.0717115	0.174846	0.0573743	Yes
NM_001001894	TTC3	20.5392	19.4276	15.0278	8.82508	9.91864	16.4578	12.5609	12.3313	15.4831	13.2293	19.098	13.458	8.08986	Yes
NM_001001895	UBASH3A	0	0.00279316	0.0238455	0	0	0	0	0	0	0.0115482	0	0	0	Yes
NM_001001912	OR4E2	0	0	0	0	0	0	0	0	0	0	0	0	0	Yes
NM_001001913	OR52N1	0	0	0	0	0	0	0	0	0	0	0	0	0	Yes
NM_001001914	OR2G3	0	0	0	0	0	0	0	0	0	0	0	0	0	Yes
NM_001001915	OR2G2	0	0	0	0	0	0	0	0	0	0	0	0	0	Yes
NM_001001916	OR52J3	0	0	0	0	0	0	0	0	0	0	0	0	0	Yes
NM_001001917	OR56A1	0	0	0	0	0	0	0	0	0	0	0	0	0	Yes
NM_001001918	OR14C36	0	0	0	0	0	0	0	0	0	0	0	0	0	Yes
NM_001001919	OR13C4	0	0	0	0	0	0	0	0	0	0	0	0	0	Yes
NM_001001920	OR4C15	0	0	0	0	0	0	0	0	0	0	0	0	0	Yes
NM_001001921	OR5AS1	0	0	0	0	0	0	0	0	0	0	0	0	0	Yes
NM_001001922	OR52N5	0	0	0	0	0	0	0	0	0	0	0	0	0	Yes
NM_001001923	OR5C1	0	0.0142324	0	0	0	0	0	0	0	0	0	0	0	Yes
NM_001001924	MTUS1	17.4554	23.7126	19.7055	9.91917	1.19126	4.03879	7.00326	4.37775	4.96178	6.45801	6.9519	17.6289	12.4903	Yes
NM_001001925	MTUS1	17.6942	23.9253	20.0671	10.0199	1.20972	4.07026	7.08128	4.47925	5.06753	6.52411	7.04949	18.0419	12.6857	Yes
NM_001001928	PPARA	1.01172	1.49884	1.68095	4.44222	2.39502	8.79583	4.88085	2.18077	0.742555	1.80162	4.81345	0.922639	3.38789	Yes
NM_001001931	MTUS1	19.5605	24.3208	23.8639	10.345	1.14648	4.44027	9.02276	6.86138	7.53282	7.74706	7.81513	27.1673	15.9127	Yes
NM_001001933	LHX8	0	0	0	0	0	0	0	0	0	0	0	0	0	Yes
NM_001001936	AFAP1L2	0.0609147	0.566659	1.62537	0.599168	3.47152	7.22642	7.47999	0.487235	2.8274	1.2921	0.405353	0.142001	0.353884	Yes
NM_001001937	ATP5A1	307.673	210.225	220.739	204.837	228.501	162.413	272.485	80.0224	550.452	108.966	187.039	144.454	151.719	Yes
NM_001001938	C9orf47	0.0305688	0	0.00896581	0.00611849	0	0.00172637	0	0	0	0	0	0.0046319	0	Yes
NM_001001952	OR5D18	0	0	0	0	0	0	0	0	0	0	0	0	0	Yes
NM_001001953	OR10G9	0	0	0	0	0	0	0	0	0	0	0	0	0	Yes
NM_001001954	OR5A2	0	0	0	0	0	0	0	0	0	0	0	0	0	Yes
NM_001001955	OR4C13	0	0	0	0	0	0	0	0	0	0	0	0	0	Yes
NM_001001956	OR13C9	0	0	0	0	0	0	0	0	0	0	0	0	0	Yes
NM_001001957	OR2W3	0	0.645392	1.58638	0	0	0	0	0	0	1.48408	0	0	0.822797	Yes
NM_001001958	OR7G3	0	0	0	0	0	0	0	0	0	0	0	0	0	Yes
NM_001001959	OR11L1	0	0	0	0	0	0	0	0	0	0	0	0	0	Yes
NM_001001960	OR5W2	0	0	0	0	0	0	0	0	0	0	0	0	0	Yes
NM_001001961	OR13C3	0	0	0	0	0	0.0242798	0	0	0	0	0	0	0	Yes
NM_001001963	OR2L8	0	0	0	0	0	0	0	0	0	0	0	0	0	Yes
NM_001001964	OR2T11	0	0	0	0	0	0	0	0	0	0	0	0	0	Yes
NM_001001965	OR4D5	0	0	0	0	0	0	0	0	0	0	0	0	0	Yes
NM_001001966	OR14A16	0	0	0	0	0	0	0	0	0	0	0	0	0	Yes
NM_001001967	OR5D13	0	0	0	0	0	0	0	0	0	0	0	0	0	Yes
NM_001001968	OR6S1	0	0	0	0	0	0	0	0	0	0	0.0186696	0	0	Yes
NM_001001971	FAM13C	4.91138	0.177433	0.0118341	0	0.358078	0.00273439	0.041686	0.0124619	0.0986407	0	0	0.00733647	0.190025	Yes
NM_001001973	ATP5C1	356.449	120.424	273.148	191.163	122.837	158.76	215.952	134.673	167.058	114.983	212.157	144.915	251.508	Yes
NM_001001974	PLEKHA1	4.27717	8.37192	11.5102	16.5684	9.81631	19.636	8.84296	3.23268	4.98364	14.8114	12.8426	2.55886	11.1518	Yes
NM_001001975	ATP5D	163.179	88.1195	138.042	130.867	98.2762	107.98	218.151	124.983	197.289	87.5813	155.536	282.005	155.065	Yes
NM_001001976	ATE1	5.29305	10.0846	8.55661	11.7222	12.0651	12.8023	6.83997	1.20615	1.9294	6.52551	10.8782	2.20174	8.99746	Yes
NM_001001991	PAMR1	0.105702	0.00249909	0.021335	0	0	0.0154052	0	0	0	0.0154985	0.0339046	0	0	Yes
NM_001001992	USP16	28.5711	26.5148	18.5464	12.2042	24.9327	24.7355	16.3009	9.18466	13.1486	20.5883	21.2549	10.9585	13.195	Yes
NM_001001994	GPM6B	0	0	0	0	0	0	0	0	0	0	0	0	0	Yes
NM_001001995	GPM6B	0	0	0	0	0	0	0	0	0	0	0	0	0	Yes
NM_001001996	GPM6B	0	0	0	0	0	0	0	0	0	0	0	0	0	Yes
NM_001001998	EXOSC10	50.9334	47.1674	29.0006	36.7453	57.7517	21.0078	42.1133	38.5718	29.5209	27.0854	44.2271	63.3196	30.0817	Yes
NM_001002	RPLP0	408.409	264.099	506.02	592.18	310.533	342.698	453.957	236.046	409.134	350.153	507.943	465.994	463.012	Yes
NM_001002000	GMPR2	31.239	38.4769	39.5035	25.3518	23.3959	48.2994	38.8309	14.2159	53.17	35.7169	50.7817	28.1534	31.6242	Yes
NM_001002001	GMPR2	32.1096	39.5406	40.5403	25.9828	24.0289	49.5664	39.8321	14.6467	54.7282	36.5415	52.0731	28.9969	32.4298	Yes
NM_001002002	GMPR2	36.7068	44.3552	45.1361	29.3044	27.0072	57.0362	44.2733	16.8633	62.2915	40.8099	58.5032	33.4342	36.8773	Yes
NM_001002006	NT5C1B	0.081248	0.047639	0.0355862	0.148683	0.163353	0.0557958	0.0579364	0.0936848	0.00963054	0.0640122	0.0710937	0.0630325	0.060672	Yes
NM_001002010	NT5C3	13.5405	8.75591	18.0491	13.9161	11.6147	9.3072	18.8247	34.3937	8.93206	11.0224	18.7672	31.3298	24.6466	Yes
NM_001002017	HCFC1R1	52.1713	13.5242	169.805	26.7516	28.7509	35.6626	18.7285	34.2766	29.8616	22.6659	13.8914	94.8805	24.6168	Yes
NM_001002018	HCFC1R1	59.7231	16.4017	214.42	29.6775	35.843	43.9511	21.5194	40.4038	35.8242	27.7901	15.3275	117.794	28.565	Yes
NM_001002019	PUS1	62.8181	18.5759	24.4123	48.6118	14.6511	21.2312	34.6769	30.1166	41.4816	21.4055	38.8133	38.7748	50.6716	Yes
NM_001002020	PUS1	61.4935	18.1839	23.8795	47.5586	14.3091	20.7491	33.8758	29.5251	40.6045	20.941	37.9397	38.0004	49.5552	Yes
NM_001002026	CLDN18	0.0474266	0.0368048	0.0327299	0.0268028	0.046742	0.026469	0.155983	0.0545713	8.13271	0.00845375	0.011096	0.0405813	0.052082	Yes
NM_001002027	ATP5G1	226.664	58.4931	35.7083	149.04	44.1139	53.8163	174.05	198.594	192.35	45.5945	124.593	60.1857	77.812	Yes
NM_001002029	C4B	0.144642	0.791009	1.73308	0.216923	0.38538	0.49611	0.154656	0.433521	0.102716	0.364384	0.245095	0.406691	0.178663	No
NM_001002030	ECHDC1	12.9201	35.6311	0.299691	29.6604	26.6451	28.2595	32.2297	40.5252	23.5815	22.7262	31.4328	19.8903	49.5179	Yes
NM_001002031	ATP5G2	227.381	51.9753	51.9392	137.118	50.2469	105.223	139.647	109.13	155.069	80.1133	167.204	90.0097	111.535	Yes
NM_001002032	HN1	164.697	69.7773	218.079	82.621	89.1075	100.22	86.4479	107.122	320.928	94.6783	80.021	92.5993	130.548	Yes
NM_001002033	HN1	162.687	69.0679	213.889	81.2309	88.6257	98.0091	84.7438	107.142	327.557	93.9075	78.4814	91.7739	129.77	Yes
NM_001002034	FAM109B	0.0641355	0.208591	6.79701	3.58337	5.03702	6.84203	6.96076	0.231102	5.38386	1.24503	3.16471	7.62868	0.0408181	Yes
NM_001002035	DEFB108B	0	0	0	0	0	0	0	0	0	0	0	0	0	Yes
NM_001002036	ASTL	0.150617	0.105134	0.342188	0.0360941	0.0075105	0.16202	0.238284	0.0221521	0.132835	0.0869344	0.271003	0.113024	0.0608622	Yes
NM_001002231	KLK2	0.00650662	0	0	0.0565584	0	0	0.121266	0.0200962	0	0.0739373	0.0841074	0	0.165642	Yes
NM_001002235	SERPINA1	0.00876383	4.07447	13.5582	1.39929	3.02846	0.257367	1.38953	0.0571432	0.00432833	7.38713	21.2744	2.41861	2.43432	Yes
NM_001002236	SERPINA1	0.00797708	3.88214	12.7195	1.29922	2.90973	0.246276	1.27771	0.0520133	0.00393977	7.0503	19.851	2.2176	2.27445	Yes
NM_001002243	AFTPH	13.8418	23.8549	14.7588	18.5532	16.3725	14.5167	12.4501	10.1602	7.89052	16.1094	17.1181	4.92541	17.0592	Yes
NM_001002244	ANAPC11	64.4537	27.5187	55.976	40.3322	31.9101	62.2675	51.3185	69.5349	56.8966	55.1615	38.6717	57.7297	69.3394	Yes
NM_001002245	ANAPC11	89.0345	37.9268	77.861	56.0994	44.0688	86.1723	71.4845	96.5537	79.2481	76.7764	53.636	79.5199	96.3599	Yes
NM_001002246	ANAPC11	91.0903	38.1737	80.1037	56.9822	44.7279	89.028	74.7318	96.1612	78.5959	77.9637	54.2503	78.8969	95.9522	Yes
NM_001002247	ANAPC11	88.8138	37.7216	77.6524	55.8625	43.8392	85.7284	71.1249	96.0165	78.842	76.4207	53.428	79.1268	95.8397	Yes
NM_001002248	ANAPC11	90.8669	37.9812	79.8898	56.7546	44.5091	88.5905	74.3689	95.6669	78.2256	77.6232	54.0519	78.5382	95.4737	Yes
NM_001002249	ANAPC11	77.6556	32.4359	67.6119	48.648	39.2687	76.9078	63.6843	85.3113	67.5989	66.9752	46.4531	68.889	81.7043	Yes
NM_001002251	ARL6IP4	92.6804	55.2693	49.4099	93.8931	35.9185	105.089	82.5063	116.102	118.609	78.4928	105.893	110.499	130.838	Yes
NM_001002252	ARL6IP4	84.4913	49.7546	44.2728	84.9155	32.5311	94.6224	74.3531	104.474	105.398	70.8452	95.7329	99.6398	117.441	Yes
NM_001002254	AWAT2	0	0	0	0	0	0	0	0	0	0	0	0	0	Yes
NM_001002255	SUMO4	0.135846	0.109521	0.201874	0.0994384	0.27028	0.239362	0.0880628	0.237757	0.201277	0.349898	0.108062	0.131737	0.299717	Yes
NM_001002257	LCLAT1	16.5452	11.9119	10.1614	7.02753	8.25641	7.99718	3.57372	12.4616	5.66419	7.7763	5.30833	6.07213	4.26215	Yes
NM_001002258	ATP5G3	129.095	73.7834	81.5844	92.0276	85.4566	64.5961	134.091	86.8241	88.2593	58.5045	96.2964	55.7868	115.595	Yes
NM_001002259	CAPRIN2	6.81561	5.53158	1.41274	2.67974	25.9777	13.4948	2.7471	2.53583	8.94043	5.14591	2.68684	2.76402	3.10434	Yes
NM_001002261	ZFYVE27	10.6997	9.7058	12.1627	11.9796	13.6043	15.3993	14.8888	5.49438	7.97976	23.7686	19.4565	9.68606	13.1462	Yes
NM_001002262	ZFYVE27	10.5236	9.50698	11.7828	11.825	13.3864	15.0579	14.4678	5.23332	7.63423	23.161	19.0239	9.25582	12.6923	Yes
NM_001002264	EPSTI1	0.714081	0.449837	4.98963	39.327	0.197754	0.645242	6.6519	1.15439	7.00831	1.42169	23.4959	0.0143075	26.1812	Yes
NM_001002265	MARCH8	6.18098	2.83434	6.0831	6.07602	7.26882	7.23297	1.23535	0.174393	0.17355	3.64222	4.68028	0.502415	1.96346	Yes
NM_001002266	MARCH8	6.94465	3.2647	6.95676	7.07659	8.38416	8.35981	1.4354	0.183822	0.18797	4.19313	5.44766	0.598049	2.28068	Yes
NM_001002269	EXOSC3	31.6557	23.9429	21.9072	19.9178	22.5346	25.3369	25.0717	66.1778	55.194	24.3578	17.4514	28.9515	22.2657	Yes
NM_001002273	FCGR2B	0.0133204	0.00976282	0.0104183	0	0.0185981	0.00601812	0	0.0137137	0	0.0134546	0	0	0	Yes
NM_001002274	FCGR2B	0.0133014	0.00974895	0.0104035	0	0.0185717	0.00600957	0	0.0136942	0	0.0134355	0	0	0	Yes
NM_001002275	FCGR2B	0.0129637	0.0095014	0.0101393	0	0.0181001	0.00780929	0	0.0133465	0	0.0130943	0	0	0	Yes
NM_001002292	WLS	67.686	76.6068	35.585	33.3105	35.0877	60.7634	38.5651	27.055	19.5422	33.3848	43.9098	13.3742	28.4068	No
NM_001002294	FMO3	0	0.0163645	0	0	0	0	0	0.257454	0.0727804	0	0	0.0108262	0	Yes
NM_001002295	GATA3	3.00632	0.298843	0.647333	0	0.0063727	1.07368	0.00986269	0.269411	0.00450845	1.80722	0.0302562	0	0.103284	Yes
NM_001002296	GOLGA7	23.9153	22.9162	24.7862	11.9253	23.384	27.7635	23.4176	26.9452	14.2502	7.18131	14.1068	16.1924	17.214	Yes
NM_001002755	NFU1	36.0755	34.3556	26.8926	26.4818	20.3957	20.9497	32.8953	50.4945	20.6523	16.0048	20.6558	30.7011	24.1275	Yes
NM_001002756	NFU1	33.0536	31.4594	25.0893	24.5224	18.6821	19.4244	30.7792	49.5018	19.5128	14.6073	18.8583	29.3927	22.5821	Yes
NM_001002757	nfu1	36.5811	34.8431	27.7725	27.1331	20.6744	21.5049	34.0508	54.8056	21.6182	16.1754	20.9209	32.5602	24.9858	Yes
NM_001002758	PRY2	0	0	0	0	0	0	0	0	0	0	0	0	0	No
NM_001002759	C10orf78	2.75057	5.64183	3.82342	5.42117	7.13249	11.738	4.55804	4.26782	4.87214	8.19664	2.99425	13.9769	5.92923	No
NM_001002760	BPY2B	0	0	0	0	0	0	0	0	0	0	0	0	0	No
NM_001002761	BPY2C	0	0	0	0	0	0	0	0	0	0	0	0	0	No
NM_001002762	DNAJB12	8.84121	15.2968	12.4976	12.6678	17.4461	12.2109	11.6544	5.77772	10.3232	14.4928	12.8991	21.0033	13.5103	Yes
NM_001002796	MCTP1	0.149509	1.75326	0.0927421	10.8414	7.73083	7.84604	3.83085	1.21812	0.0439223	2.28867	0.128158	0.0281224	0.0349987	Yes
NM_001002800	SMC4	45.5389	54.8827	29.982	40.7387	68.8045	43.8653	23.011	31.164	34.4073	65.3744	43.4065	28.9178	39.1448	Yes
NM_001002810	PDE4DIP	0.0740488	0.0705539	0.277997	0	1.04681	0.0669103	0.0240013	0.0533647	0.0384003	0.0448771	0	0.0538569	0	Yes
NM_001002811	PDE4DIP	7.32557	13.6484	9.19951	7.68218	17.0795	6.58468	4.16612	5.43145	5.00436	4.40634	7.92423	3.18699	4.50347	Yes
NM_001002812	PDE4DIP	5.94376	11.3848	8.14069	6.3246	14.1993	5.66914	3.79768	5.66598	5.13433	3.86786	6.84714	3.30755	4.03434	Yes
NM_001002814	RAB11FIP1	3.35128	9.6452	12.6644	19.9572	11.4156	9.6908	38.7305	3.54952	10.7026	4.43545	17.2333	3.48659	15.8487	Yes
NM_001002836	ZNF787	21.0801	14.7822	24.3577	17.3855	21.0997	16.039	18.5034	42.9709	23.8973	34.3256	16.7918	27.78	33.6045	Yes
NM_001002837	INPP5J	2.24418	2.92344	7.34663	7.17551	1.73963	4.24942	2.4899	1.22595	1.82603	3.14156	3.55215	7.58577	0.925684	Yes
NM_001002838	WNK3	0	0	0	0	0	0	0	0	0	0	0	0	0	Yes
NM_001002841	MYL4	0	0	0.0159838	0.0327232	0.0428	0.0184661	0	0.0210396	0	0.0928898	0	0.0247726	0	Yes
NM_001002843	ZNF280D	3.35017	5.77473	2.17585	3.85203	3.55905	4.03595	3.24361	3.22075	4.24865	4.28219	2.33143	4.63461	3.03647	Yes
NM_001002844	ZNF280D	6.12914	3.80304	2.62799	3.06454	3.9521	3.25827	2.64231	2.75763	4.38407	4.31317	2.19589	5.74089	3.0672	Yes
NM_001002857	ANXA2	3.15587	224.338	179.667	109.402	205.16	177.538	211.655	239.238	526.899	648.034	50.0276	283.061	284.938	Yes
NM_001002858	ANXA2	3.06091	220.173	175.667	104.588	196.245	172.39	207.139	238.57	515.349	623.738	48.7656	281.604	279.233	Yes
NM_001002860	BTBD7	3.26524	6.28341	7.04538	2.81405	12.7848	8.03604	3.02605	2.32958	4.806	3.25065	4.22487	3.3438	3.56047	Yes
NM_001002862	DERL3	0.0843766	0.591913	0.0212122	0.719652	0.0126223	1.32607	2.1879	0.111687	5.42709	2.65269	0.892927	0.029223	0.465402	Yes
NM_001002876	CENPM	33.8639	27.8876	29.0131	20.8567	39.3443	20.8427	37.7691	45.4374	25.0463	23.9213	15.7211	48.1559	34.069	Yes
NM_001002877	THOC5	26.1323	21.4806	24.0949	10.9479	56.0391	30.606	15.9429	9.68495	24.7052	32.5222	12.0731	28.2873	12.5867	Yes
NM_001002878	THOC5	24.7281	20.2113	22.754	10.2846	53.3799	29.4381	14.9917	9.1897	23.4388	30.7644	11.3903	26.9138	11.8519	Yes
NM_001002879	THOC5	25.4792	20.6757	23.499	10.5666	54.2503	30.0632	15.4862	9.59135	24.273	31.5821	11.6182	27.9096	12.2477	Yes
NM_001002880	CBY1	12.1303	15.4229	17.3756	6.33424	14.6673	26.1738	22.3791	31.059	12.7168	6.7963	12.3459	26.912	8.95632	Yes
NM_001002901	FCRLB	0.84945	1.13302	0.264102	0.0265517	1.87295	0.0476745	0.350576	0.760463	1.10616	0.951274	0.0419698	0.0447694	0.196996	Yes
NM_001002905	OR8G1	0	0	0	0	0	0	0	0	0	0	0	0	0	Yes
NM_001002906	XKRY2	0	0	0	0	0	0	0	0	0	0	0	0	0	No
NM_001002907	OR8K1	0	0	0	0	0	0	0	0	0	0	0	0	0	Yes
NM_001002909	GPATCH8	14.5864	13.8645	11.0626	10.8548	14.7583	10.8261	6.83212	3.1348	5.2111	10.3649	9.94387	6.36963	5.91139	Yes
NM_001002911	GPR139	0	0	0	0	0	0	0	0	0	0	0	0	0	Yes
NM_001002912	C1orf173	0.00521872	0.00573739	0.00408173	0.00238755	0.00136621	0	0	0	0.00193309	0	0.00518919	0	0	Yes
NM_001002913	PTRH1	11.1404	10.0725	17.4712	18.9247	15.2158	20.4423	76.0198	14.0547	22.434	30.2647	15.9351	9.32573	13.1923	Yes
NM_001002914	KCTD11	1.59569	7.3359	7.21997	7.17695	2.60425	7.21486	4.86931	3.67662	4.86922	6.33883	1.71153	7.54781	3.19676	Yes
NM_001002915	IGFL2	0	38.3782	6.47932	0.0567788	0.0324902	0.0373811	66.7512	0.532384	17.9364	3.02427	0.452486	18.8554	0.157973	Yes
NM_001002916	H2BFWT	0	0	0	0	0	0	0	0	0	0	0	0	0	Yes
NM_001002917	OR8D1	0.161375	0	0	0	0	0	0	0	0	0	0	0.0122261	0	Yes
NM_001002918	OR8D2	0	0	0	0	0	0	0	0	0	0	0	0	0	Yes
NM_001002919	FAM150B	0.026666	0.0537465	0.0625691	0.0548983	0.0349046	0.0210834	0.021608	0.0480435	0.00987748	0.0606033	0.0397727	0.0404054	0	Yes
NM_001002920	POTEA	0	0	0	0	0.00529509	0	0	0.0572651	0	0	0	0	0	Yes
NM_001002923	IGFL4	0.0811072	9.23783	0	1.95179	0	0.527675	3.47016	0.40081	2.8481	0.66359	0.225815	1.16015	0.633199	Yes
NM_001002925	OR5AP2	0	0	0	0	0	0	0	0	0	0	0	0	0	Yes
NM_001002926	TWISTNB	11.2865	11.6176	9.41942	5.75046	18.6817	9.01102	8.57139	14.5705	1.69256	15.0147	7.88308	6.5291	11.0983	Yes
NM_001003	RPLP1	754.677	301.508	868.198	1144.22	434.425	398.091	709.539	397.603	827.658	665.773	540.12	739.371	697.587	Yes
NM_001003395	TPD52L1	7.21064	48.3439	15.678	23.1348	26.5712	58.8514	91.5608	92.15	4.09195	29.3159	26.802	49.9931	87.7994	Yes
NM_001003396	TPD52L1	8.29924	53.2316	17.8088	26.7996	29.5601	66.412	104.192	99.3439	4.62969	32.3633	30.9991	55.599	100.976	Yes
NM_001003397	TPD52L1	8.28799	53.0507	17.845	27.2205	29.2729	67.1423	105.724	100.375	4.61722	32.2218	31.4315	55.8571	102.748	Yes
NM_001003398	BICD1	3.65128	6.11028	1.80681	1.59765	5.47189	3.22483	1.15585	1.64405	2.91548	3.1729	0.497267	2.2423	6.07624	Yes
NM_001003406	CACNA1I	0.00376916	0.035222	0.181301	0.00560424	0.00493366	0.0225635	0.0183254	0.025223	0	0.00713841	0.067461	0.00456895	0.014393	Yes
NM_001003407	ABLIM1	21.3554	23.8711	26.4466	21.93	28.3812	23.2306	27.9831	4.62803	16.1333	8.27343	23.2896	3.79582	11.1493	Yes
NM_001003408	ABLIM1	21.1201	23.6108	26.1685	21.6884	28.0686	22.9763	27.6748	4.57954	15.9555	8.18229	23.033	3.75401	11.0265	Yes
NM_001003443	OR56A3	0	0	0.015428	0	0	0	0	0	0	0	0	0	0	Yes
NM_001003652	SMAD2	7.46243	8.57794	15.696	5.83656	9.92951	7.34593	7.88154	2.19834	21.7623	7.75243	4.36472	4.98197	2.21354	Yes
NM_001003665	C1orf95	0.00242827	0.00533922	0	0	0	0.0186505	0	0.0337496	0	0.0128769	0.212479	0	0	Yes
NM_001003674	C18orf1	1.94202	0.00306593	0.0114512	0.0574132	0.0262826	0.133241	0.0110165	0.11628	0.00542323	0.00950693	0.0124784	0.0126769	0.00354973	No
NM_001003675	C18orf1	1.90563	0.00308488	0.011522	0.056324	0.0264451	0.131687	0.0110846	0.116999	0.00545677	0.00956571	0.0125556	0.0127553	0.00357168	No
NM_001003676	C11orf49	8.72075	8.24441	7.26546	37.5025	12.7337	12.0451	24.9653	10.4875	21.2545	10.8281	29.023	21.9399	18.0142	Yes
NM_001003677	C11orf49	9.87138	9.48876	8.37781	43.3085	14.6962	13.7933	28.9456	11.9648	24.8993	12.3779	33.3824	25.4009	20.7566	Yes
NM_001003678	C11orf49	8.49568	8.8104	7.33852	37.6885	14.0932	12.5307	23.7199	9.22677	18.4567	12.0262	29.2587	16.2216	17.066	Yes
NM_001003679	LEPR	0.470258	3.57439	1.70695	2.90815	2.64661	1.83341	2.13187	1.11222	0.0833962	1.55704	0.949638	0.446791	0.4992	Yes
NM_001003680	LEPR	0.621157	4.64589	2.26324	3.47528	3.30937	2.01512	2.36199	0.895298	0.139174	1.95571	1.22323	0.374644	0.740513	Yes
NM_001003681	HMGXB4	10.6982	11.8739	7.82368	5.97652	9.08745	7.02579	6.84919	4.47766	3.2003	6.45283	6.48582	6.48959	5.20563	Yes
NM_001003682	TMEM200B	13.7981	2.77443	2.90167	3.06133	1.86144	3.67286	2.67289	9.54678	2.48002	1.01212	3.33244	3.09266	3.0489	Yes
NM_001003683	PDE1A	0.0880375	0.0101881	0.0362405	0.0233182	0.058225	0.0355883	0	0.038163	0	0	0.0184293	0	0	Yes
NM_001003684	UQCR10	86.6138	44.5444	77.0946	43.877	48.7954	83.7696	97.8909	127.568	164.038	73.8814	43.762	56.4505	57.9958	No
NM_001003688	SMAD1	8.53544	8.24438	7.93994	9.05559	7.81989	7.25219	9.86972	4.32357	2.55577	11.521	5.11165	6.01912	4.32928	Yes
NM_001003690	MAD2L1BP	13.3306	15.8784	20.0266	16.797	20.9674	15.7371	15.6725	24.3917	15.7322	17.9665	13.8012	12.1871	20.2275	Yes
NM_001003692	ZMAT5	21.3532	9.87426	19.4186	6.37676	9.39813	17.368	11.8773	6.5701	25.267	29.4367	8.13842	21.2305	11.1058	Yes
NM_001003693	LY6G6F	0.0103537	0.447722	0.024294	0.23684	0	0.046778	0.528559	1.08726	1.66446	3.21586	0.164722	0.690289	0.193291	Yes
NM_001003694	BRPF1	8.98475	7.6846	12.642	7.39745	10.1526	6.71675	5.99299	4.04385	9.28968	16.3104	8.50213	7.85021	4.82714	Yes
NM_001003696	ATP5J	95.8204	49.3953	51.5848	44.604	60.2458	96.8521	93.4294	148.026	104.937	57.8247	81.1847	80.2333	76.3543	Yes
NM_001003697	ATP5J	115.086	59.5358	61.5984	54.9789	71.6695	117.484	114.654	184.288	129.986	69.4366	99.077	97.7514	95.0001	Yes
NM_001003698	RREB1	4.68643	8.7613	5.58941	8.61055	8.71142	7.33621	5.90223	4.64961	4.44648	10.4408	7.30878	3.01101	5.94855	Yes
NM_001003699	RREB1	4.61568	8.68992	5.52517	8.50294	8.60771	7.25886	5.82229	4.56356	4.37477	10.2913	7.22113	2.96294	5.89377	Yes
NM_001003700	RREB1	4.57212	8.75132	5.4552	8.5248	8.72822	7.24158	5.87608	4.88901	4.60957	10.159	7.25151	3.1195	5.99661	Yes
NM_001003701	ATP5J	68.7334	35.9162	38.3516	31.5829	43.9682	69.7985	66.7978	104.783	74.6518	41.7258	58.5854	57.1778	53.8442	Yes
NM_001003702	ARHGEF35	0.037802	18.6572	11.6047	19.1621	28.9999	10.0304	20.4528	8.08331	1.87912	22.2282	11.2539	0.751502	14.7302	Yes
NM_001003703	ATP5J	72.8478	37.3026	40.2688	33.9403	45.4173	72.7797	71.4918	108.169	77.4047	43.6671	62.1981	59.8101	57.5649	Yes
NM_001003704	MTFP1	45.3788	19.4934	35.2478	21.059	14.2716	24.7631	45.34	57.3939	63.4116	23.9916	18.4005	22.8324	31.7549	No
NM_001003712	OSBPL8	8.90722	17.0778	12.1807	10.634	38.5123	32.903	6.28146	5.10644	4.19517	13.8373	10.0572	4.42799	9.0737	Yes
NM_001003713	ATP5J2	202.789	88.6004	154.586	144.548	189.102	181.121	279.677	310.005	660.152	214.487	179.357	295.494	317.125	Yes
NM_001003714	ATP5J2	192.288	78.8642	143.535	133.327	181.557	162.503	250.056	277.628	601.476	195.5	161.896	263.869	296.054	Yes
NM_001003715	RECQL5	5.09471	4.75034	2.60775	4.08605	3.00195	4.84465	2.61335	3.0717	2.89133	4.95131	4.5469	1.27009	2.02281	Yes
NM_001003716	RECQL5	4.27046	3.98593	2.19184	3.41342	2.50752	4.0666	2.18359	2.56942	2.4217	4.17675	3.7889	1.0638	1.72194	Yes
NM_001003722	GLE1	26.0725	22.1367	18.26	36.733	29.8327	22.5188	33.0209	12.4656	7.28296	17.944	21.7732	11.454	19.6789	Yes
NM_001003745	OR10A3	0	0	0	0	0	0	0	0	0	0	0	0	0	Yes
NM_001003750	OR8I2	0	0	0	0	0	0	0	0	0	0	0	0	0	Yes
NM_001003760	KLHL31	0.198728	0.189826	0.119759	0.371868	0.150105	0.31572	0.187432	0.479627	0.0736118	0.128336	0.372532	0.365294	0.140991	Yes
NM_001003785	ATP5H	89.6346	64.5459	61.5193	65.859	66.2244	99.1123	103.872	103.81	310.28	100.137	80.0218	123.455	118.923	Yes
NM_001003786	STRADA	12.2091	8.16945	4.75494	4.16339	4.08785	8.40642	6.22484	3.97593	5.41205	7.32831	6.79809	6.87243	4.16121	Yes
NM_001003787	STRADA	12.0283	8.05102	4.64156	4.08892	4.17073	8.29731	6.11916	3.79705	5.25213	7.25352	6.62962	6.58059	4.00843	Yes
NM_001003788	STRADA	12.1072	8.11373	4.69842	4.13256	4.19509	8.37726	6.18848	3.842	5.31407	7.28619	6.69128	6.65101	4.04657	Yes
NM_001003789	RABL2B	12.7351	4.76052	11.4719	4.55663	8.89195	14.84	14.6308	7.07703	5.17133	4.37237	7.09332	3.76647	3.42406	Yes
NM_001003790	ERLIN2	2.77918	13.5561	4.01424	2.88151	6.02122	5.62869	5.1253	2.7571	5.42729	1.15353	2.05406	3.26564	2.24089	Yes
NM_001003791	ERLIN2	3.13623	16.1844	4.87242	3.5269	6.6387	6.97976	6.06356	3.22254	6.33615	1.3153	2.55314	3.71278	2.78066	Yes
NM_001003792	RBMS3	0.201458	0.0511753	0	0	0.0958905	0.00155145	0	0	0	0.0260141	0	0.00832519	0	Yes
NM_001003793	RBMS3	0.202386	0.0516667	0	0	0.0988217	0.00154108	0	0	0	0.0258403	0	0.00826957	0	Yes
NM_001003794	MGLL	0.252002	6.6181	11.5852	23.6131	25.2585	2.80404	22.3105	1.96764	9.66496	14.2014	24.7383	1.42195	4.91274	Yes
NM_001003795	GTF2IRD2B	2.12876	2.5756	3.42549	2.51026	5.62868	9.54254	4.69681	2.74286	4.17657	3.05598	4.82269	4.10227	3.13642	Yes
NM_001003796	NHP2L1	123.414	52.3926	103.077	72.6556	97.8621	120.36	102.957	129.296	85.9298	74.6705	46.4659	112.537	69.2262	Yes
NM_001003799	TARP	0.0544701	0	0	0	0	0	0	0	0	0	0	0	0	No
NM_001003800	BICD2	10.7135	7.9729	9.66389	9.65015	7.57942	13.4565	5.21686	4.50377	2.79929	8.02341	5.70609	3.86144	2.83175	Yes
NM_001003801	SMARCD3	3.39954	2.53206	27.8838	0.431742	16.5915	26.3747	0.630543	2.2045	1.92157	2.85965	1.65723	50.7753	0.19669	Yes
NM_001003802	SMARCD3	3.49742	2.62845	28.9219	0.434302	16.7423	27.0629	0.634283	2.21757	1.91651	2.9439	1.66706	51.5206	0.197856	Yes
NM_001003803	ATP5S	3.18232	4.21612	2.73434	6.15461	5.91251	3.37613	6.52669	3.05232	6.06068	4.377	8.71319	6.27395	5.19483	Yes
NM_001003805	ATP5S	2.95249	3.69385	2.44892	5.44898	5.35355	2.99819	5.72109	2.61446	5.35451	3.89834	7.93604	5.60188	4.3762	Yes
NM_001003806	TARP	0.0544701	0	0	0	0	0	0	0	0	0	0	0	0	No
NM_001003809	DLGAP1	0	0.104196	0.00555958	0.010569	0.00372174	0.0891189	0.0158398	0.969652	0.260666	0.0323095	0.00706802	0.00861655	0.186989	Yes
NM_001003810	HNRNPD	227.665	67.9307	129.585	139.259	165.188	96.1667	115.931	94.4109	155.517	83.8204	89.9056	134.013	100.091	Yes
NM_001003811	TEX11	0	0	0	0	0	0	0	0	0	0	0	0	0	Yes
NM_001003818	TRIM6	0	5.36948	0.174604	0.00996409	0.0313593	2.18325	0.322084	0.0252255	0.0141181	0.0288738	0.157008	0.0726028	0.249503	Yes
NM_001003819	TRIM6-TRIM34	0.632562	5.35717	1.30395	2.5273	0.134724	1.33934	2.78008	0.405645	0.512305	0.0527936	2.49994	0.14296	3.08421	Yes
NM_001003827	TRIM34	0.952936	4.5546	1.84436	3.79623	0.181817	0.574655	4.04742	0.619407	0.777756	0.079532	3.68579	0.205576	4.55033	Yes
NM_001003828	PARVB	44.6073	0.213922	31.1434	31.4909	27.7407	0.156454	0.0881908	0.162979	0.117277	0.0974393	17.0592	0.305834	26.9508	Yes
NM_001003841	SLC6A19	0.00722205	0	0.0155336	0.70294	0	0.00815728	0.00438912	0	0.00401273	0.00273557	4.6175	0.0109431	0.162405	Yes
NM_001003845	SP5	7.65494	3.37193	0.863896	7.41727	0.819701	0.863538	19.8852	17.2551	8.81247	33.8558	3.71508	20.7881	5.76229	Yes
NM_001003891	MED15	12.7528	25.9661	37.412	18.7752	30.7786	31.3509	24.5839	28.5108	33.9751	53.264	19.1293	25.6477	22.5845	Yes
NM_001003892	DUPD1	0	0	0	0.0192886	0	0	0	0	0	0	0	0	0	Yes
NM_001003894	CDY1B	0	0	0	0	0	0	0	0	0	0	0	0	0	No
NM_001003895	CDY1B	0	0	0	0	0	0	0	0	0	0	0	0	0	No
NM_001003897	MANBAL	23.4657	20.4487	36.2433	38.5422	26.0332	59.8008	37.2716	40.743	43.0185	59.9954	65.0004	43.1539	34.8518	Yes
NM_001003927	EVI2A	0.0372776	0.0182144	0	0.0014212	0.0260238	0.00421049	0	0.0127928	0.0138081	0.00470666	0.0185333	0.0376563	0.0105443	Yes
NM_001003931	PARP3	3.80958	2.71965	12.5712	9.01298	15.638	6.83282	2.97799	1.75129	1.8434	5.91581	6.67132	7.70136	5.66651	Yes
NM_001003936	TXNDC8	0	0	0	0	0	0	0	0	0	0	0.0747535	0	0	Yes
NM_001003937	TSPYL6	0.00906955	0.00443153	0	0	0	0	0	0.0062249	0	0	0	0.00732936	0.00513082	Yes
NM_001003938	HBM	0.0182452	0	0	0	0	0	0	0	0	0	0.0725677	0	0	Yes
NM_001003940	BMF	0.752214	2.43778	3.94509	0.416249	0.271617	2.12744	0.176231	0.495057	0.156684	2.78424	0.353147	0.331354	2.10288	Yes
NM_001003941	OGDH	17.9229	39.9169	32.5185	21.4879	28.4133	39.3335	33.8404	4.46089	3.36609	31.3138	30.3174	3.15889	14.9691	Yes
NM_001003942	BMF	0.778027	2.54653	4.10293	0.431035	0.279014	2.21982	0.184817	0.52888	0.165809	2.89695	0.373035	0.353992	2.1742	Yes
NM_001003943	BMF	0.780708	2.53814	4.09693	0.433993	0.283166	2.20797	0.182012	0.541079	0.169634	2.89769	0.38164	0.359514	2.17623	Yes
NM_001003954	ANXA13	0.064148	0.0085483	0.0273667	65.9065	0	0.0184431	39.9587	3.36215	0.0864049	0.0265069	231.424	0	1.03921	Yes
NM_001003962	CAPNS1	130.766	188.387	256.348	213.095	313.447	316.771	393.042	206.762	394.976	286.353	169.514	211.937	269.436	Yes
NM_001004	RPLP2	1855.85	620.032	757.342	900.361	524.876	750.668	882.182	1064.23	1553.41	928.269	1323.55	1582.72	1498.39	Yes
NM_001004019	FBLN2	0.0323345	0.00315984	0.187145	0.0581856	0.00677191	0.0292174	0	0.00221929	0	0.0228623	0.338663	0.0391957	0.0182923	Yes
NM_001004023	DYRK3	4.76873	1.05096	3.99157	0.0340297	4.12819	3.06933	0.29467	0.170175	0.287768	2.6171	0.484858	0.846555	0.0210398	Yes
NM_001004051	GPRASP2	0	0	0	0	0	0	0	0	0	0	0	0	0	Yes
NM_001004052	OR52B2	0	0	0	0.00880178	0	0	0	0	0	0	0	0	0	Yes
NM_001004055	LRRC29	1.25654	0.266865	0.262446	0.225372	0.46352	0.545123	0.225623	0.176405	0.132227	0.746377	0.425941	1.87799	0.278685	Yes
NM_001004056	GRK4	0.817356	0.970785	0.914663	0.103552	0.285302	0.142031	0.125671	0.176929	0.0869466	0.444551	0.191721	0.767229	0.0995926	Yes
NM_001004057	GRK4	0.82448	0.989394	0.922173	0.105537	0.295244	0.144753	0.12808	0.171524	0.0886133	0.466017	0.195396	0.766401	0.101502	Yes
NM_001004058	OR8K5	0	0	0	0	0	0	0	0	0	0	0	0	0	Yes
NM_001004059	OR4S2	0	0	0	0	0	0	0	0	0	0	0	0	0	Yes
NM_001004060	NOMO2	79.906	97.5842	68.1625	76.0148	79.307	66.8501	65.2271	33.4999	44.2029	59.5078	40.4707	32.2613	67.9593	Yes
NM_001004063	OR4K1	0	0	0	0	0	0	0	0	0	0	0	0	0	Yes
NM_001004064	OR8J3	0	0	0	0	0	0	0	0	0	0	0	0	0	Yes
NM_001004065	AKAP2	0.00671722	6.31846	12.6489	2.70126	0.332006	15.4315	2.92403	0.107883	0.00597157	2.59523	5.09223	0.10911	3.05069	Yes
NM_001004067	NOMO3	82.4853	96.1127	69.7198	75.9631	76.8562	67.8387	66.4992	44	46.7993	60.7536	39.6508	37.9709	69.2407	Yes
NM_001004105	GRK6	30.5743	17.4262	30.4464	22.0826	27.0058	17.29	29.6418	17.5435	14.9883	33.0966	27.1045	17.8978	23.7628	Yes
NM_001004106	GRK6	26.3437	14.0184	26.1206	18.6225	22.4674	14.0007	26.9009	22.9663	15.2566	27.1479	22.994	21.1004	22.9278	Yes
NM_001004124	OR4P4	0	0	0	0	0	0	0	0	0	0	0	0	0	Yes
NM_001004125	TUSC1	7.7916	0.0222097	0	3.61836	4.5575	3.88475	4.48435	3.16655	0.0056123	0.516514	3.38224	1.40503	3.95358	Yes
NM_001004127	ALG11	7.93158	15.3809	3.51639	15.1664	8.69862	5.81224	8.23981	4.07351	2.78817	5.37659	11.8971	3.59057	4.8292	Yes
NM_001004128	QSOX1	5.18465	160.946	81.9194	17.0573	48.6436	63.198	111.628	54.131	48.5326	62.5807	27.4615	35.0384	9.20915	Yes
NM_001004134	OR10AD1	0	0.0502828	0	0	0	0	0	0.050451	0	0	0	0	0	Yes
NM_001004135	OR2A12	0	0	0	0	0	0	0	0	0	0	0	0	0	Yes
NM_001004136	OR2T2	0	0	0	0	0	0	0	0	0	0	0	0	0	Yes
NM_001004137	OR52M1	0	0	0	0	0	0	0	0	0	0	0	0	0	Yes
NM_001004195	OR4F4	0.0203695	0	0	0	0	0	0	0	0	0	0	0	0.0345702	Yes
NM_001004196	CD200	3.43097	0.00597302	0.0223091	0.0037284	0.0384026	0.0202508	0.300471	0.243316	0	0	0.129655	0.0148183	1.36236	Yes
NM_001004297	OR13A1	0	0	0	0.00411342	0	0.00406218	0	0.00925663	0	0	0.151984	0.0163485	0.0152594	Yes
NM_001004298	C10orf90	0.00606007	0.00222079	0	0.00277246	0	0.00547586	0	0.012478	0	0.00918172	0.00602578	0	0	Yes
NM_001004301	ZNF813	1.14318	0.610397	0.043658	0.537301	0.250174	0.673853	0.177307	0.445948	0.206763	0.436396	1.92264	0.0189458	0.390305	Yes
NM_001004303	C1orf168	0.0268959	0.0197127	0	0	0	0	0.0370503	0.016614	0	0.114101	0.0695336	0.0163015	0	Yes
NM_001004304	ZNF740	11.7069	9.44438	9.08246	15.722	8.65164	8.39398	5.78571	3.6777	5.70757	10.5752	12.1995	4.54845	8.05989	Yes
NM_001004306	CCDC144NL	0.0766102	0	0	0	0.0488316	0.0120391	0	0.0240046	0	0.0605602	0.00662407	0.0201883	0.0339182	Yes
NM_001004308	ZCCHC16	0	0	0	0	0	0	0	0	0	0	0	0	0	Yes
NM_001004309	ZNF774	0.716465	0.733671	0.731263	1.72027	0.532096	0.523426	0.741147	0.392351	1.11049	0.277156	0.606307	0.492762	1.91448	Yes
NM_001004310	FCRL6	0	0	0	0	0	0	0.00776693	0	0.00710086	0.0217837	0	0	0	Yes
NM_001004311	FIGLA	0	0	0	0	0	0.0290834	0	0	0	0	0	0	0	Yes
NM_001004312	RTP2	0	0	0	0	0	0	0	0	0	0	0	0.0168336	0	Yes
NM_001004313	TMEM220	0.0936582	0.0775017	0.120513	0.0856967	0.0727656	0.219763	0.288883	0.00622088	0.0470025	0.0320427	0.258356	0.0622593	0.507623	Yes
NM_001004316	LEKR1	0.054312	0.220263	0.0877903	0.218659	0.322283	0.148864	0.126162	0.383955	0.0187768	0.0548595	0.129611	0.136062	0.0860311	Yes
NM_001004317	LIN28B	0	0	0	0	0	0	0	0	0	0	0	0	0	Yes
NM_001004318	PAPL	0	2.08061	0.0270768	0	3.05835	2.03758	0	0.0421217	0.00233154	3.96729	0	0.427281	0.208311	Yes
NM_001004319	VHLL	0	0.0202759	0.0144248	0.00843757	0	0.0499949	0	0	0.0409891	0	0	0	0	Yes
NM_001004320	AGMO	0.206908	0.00275724	0.0882707	0.0464694	0.00787878	0.00849826	0.0518227	0.437655	0.535099	0.0626981	0.561102	1.29054	0.0702312	No
NM_001004323	C7orf61	0.260252	0.408739	0.850554	0.136074	0.272526	1.41518	0.0301267	0.133968	0.0413147	0.197156	0.147874	0.394344	0.331267	Yes
NM_001004325	KRTAP5-2	0.0752797	0.50883	0	0.306135	0.131383	0.502611	0.515116	0.232508	0.32842	0.354846	0.731903	0.0608356	2.02999	Yes
NM_001004326	SLC22A20	0.0849107	0.205848	0.78672	0.143433	0.300944	0.33641	0.269927	0.0941424	0.0338716	1.49432	0.441635	0.00791755	0.155192	Yes
NM_001004328	ZNF705A	0.00543699	0.00199245	0.00425244	0.00248741	0	0.00614106	0.0044057	0.00559753	0	0.0164754	0	0	0	Yes
NM_001004329	DBX2	0.00343352	0	0.00537093	0	0	0	0	0	0	0	0	0.0249725	0	Yes
NM_001004330	PLEKHG7	0	0	0.0915352	0.014365	0	0.00128964	0.0508865	0.0764074	0.019032	0.0172994	0.164622	0	0.0968894	Yes
NM_001004333	RNASEK	102.015	95.3154	128.677	96.3571	100.324	149.304	126.745	192.676	158.323	100.174	67.9832	126.101	103.214	Yes
NM_001004334	GPR179	0.638353	0.0935729	0.0439729	0.0171476	0.0404755	0.022755	0	0.00844113	0.00173545	0.0266196	0.179358	0.100808	0	Yes
NM_001004339	ZYG11A	0.0262117	0.00960561	0.230637	0	0.00228733	0	0.00176999	0.00899524	0.0032364	0	0	0.00529561	0	Yes
NM_001004340	FCGR1B	0.00574572	0.00842236	0.00898782	0.123546	0.0300835	0.0103836	0	0.0354923	0.00851319	0	0.0457056	0.0487544	0	Yes
NM_001004341	ETV3L	0.0661134	0.12114	0.140354	0.0885796	0.365938	0.0960106	0.0688796	0.0145855	0.0174924	0.236114	0.056348	0.0114489	0.0240439	Yes
NM_001004342	TRIM67	0.41577	0.0128645	0	0.191719	0.0126363	0.00693885	0.153786	0.0124235	0.0113779	0.0365665	0.157077	0.0159576	0.00372363	Yes
NM_001004343	MAP1LC3C	0	0	0.0122418	0	0	0.0813218	0	0	0	0	0	0	0	Yes
NM_001004351	SPDYE3	0.562289	0.470069	0.735265	0.539948	1.36469	1.21067	1.49742	1.02211	1.95046	1.13148	1.25217	1.84601	1.20281	Yes
NM_001004352	LOC100506422	0	0	0	0	0	0	0	0	0	0	0	0	0	No
NM_001004353	C9orf173	0.516018	0.34911	0.180065	1.33656	0.174576	0.462686	0.35381	0.809142	0.247012	0.216506	0.284177	1.01044	0.485039	Yes
NM_001004354	NRARP	21.1898	5.63557	20.8701	23.001	3.48014	10.7799	17.4511	22.0654	11.7709	10.5845	15.27	14.985	48.6486	Yes
NM_001004356	FGFRL1	1.30723	26.4606	22.2389	6.58657	14.6623	20.9954	28.5204	17.427	11.4985	30.0745	15.7829	15.5081	13.3361	Yes
NM_001004358	FGFRL1	1.35347	27.4202	23.0651	6.82235	15.2053	21.7647	29.556	18.0682	11.9274	31.1712	16.3596	16.0925	13.8386	Yes
NM_001004360	DPP10	0	0	0	0	0	0	0	0	0	0	0.0755423	0	1.77611	Yes
NM_001004416	UMODL1	0	0.00139972	0.0104558	0.152026	0.00599951	0.00345132	0	0	0.0268814	0.0520835	0.250663	0.00463001	0.0226883	Yes
NM_001004419	CLEC2D	16.9146	12.4738	12.3824	11.3534	10.6376	7.74755	21.5718	6.84244	9.08512	12.1334	12.631	13.4493	12.3925	Yes
NM_001004426	PLA2G6	5.47837	2.53934	1.99133	4.28763	1.07982	3.04271	2.40078	1.98861	0.883368	1.31811	5.63188	3.3112	1.72428	Yes
NM_001004431	METRNL	0.224186	19.5685	34.3234	9.34619	10.953	24.5336	30.9053	20.7725	17.9215	23.5221	12.971	30.2839	40.0217	Yes
NM_001004432	LINGO4	0	0	0	0	0	0	0.00581626	0	0	0.0108751	0	0	0	Yes
NM_001004434	SLC30A2	0.00754516	0	0.0177039	0	0	0	0	0.186431	0	1.03458	0.0600197	0.00914619	0.377758	Yes
NM_001004439	ITGA11	0	0.0163366	0	0.00169957	0.1381	0.00755281	0	0.0133862	0	0.0168857	0	0.00900643	0.00945725	Yes
NM_001004440	FAM19A3	0.0575733	0.229069	0.398837	0	0.602886	1.28943	0	0.0423381	0.0121863	0.0747689	0	0.498499	0.0279174	Yes
NM_001004441	ANKRD34B	0.0427604	0	0.00557405	0	0	0	0	0.0171201	0	0	0	0	0	Yes
NM_001004450	OR1B1	0	0.00716076	0	0	0	0	0	0	0	0	0	0	0	Yes
NM_001004451	OR1J1	0	0	0	0	0	0	0	0	0.00714844	0	0	0	0.0327526	Yes
NM_001004452	OR1J4	0	0	0	0	0	0.00896868	0	0	0	0	0	0	0	Yes
NM_001004453	OR1L6	0	0	0	0	0	0	0	0	0	0	0	0	0	Yes
NM_001004454	OR1L8	0	0	0	0	0	0	0	0	0	0	0	0	0	Yes
NM_001004456	OR1M1	0	0	0	0	0	0	0	0	0	0	0	0	0	Yes
NM_001004457	OR1N2	0	0.00690142	0	0	0	0	0	0	0	0	0	0	0	Yes
NM_001004458	OR1S1	0	0	0	0	0	0	0	0	0	0	0	0	0	Yes
NM_001004459	OR1S2	0	0	0	0	0	0	0	0	0	0	0	0	0	Yes
NM_001004460	OR10A2	0	0.0150274	0	0.00938022	0	0.00463169	0	0	0	0	0	0.0994159	0.0347974	Yes
NM_001004461	OR10A6	0	0	0	0	0	0	0	0	0	0.0299813	0	0	0	Yes
NM_001004462	OR10G4	0	0	0	0	0	0	0	0	0	0	0	0	0	Yes
NM_001004463	OR10G7	0	0	0	0	0	0	0	0	0	0	0	0	0	Yes
NM_001004464	OR10G8	0	0	0	0	0	0	0	0	0	0	0	0	0	Yes
NM_001004465	OR10H4	0	0	0	0	0	0	0	0	0	0	0	0	0	Yes
NM_001004466	OR10H5	0	0.0144573	0	0	0.0206559	0	0	0	0.0146133	0.0747164	0	0	0	Yes
NM_001004467	OR10J3	0	0	0	0	0	0	0	0	0	0	0	0	0	Yes
NM_001004469	OR10J5	0	0	0	0	0	0	0	0	0	0	0	0	0	Yes
NM_001004470	ST8SIA6	0.0199711	0.0390328	0.0104133	0.328921	0	0.0601527	0	0.0137072	0	0.0504309	0.251535	0	0.0225961	Yes
NM_001004471	OR10Q1	0	0	0	0.00825061	0	0	0	0	0	0	0.0358644	0	0	Yes
NM_001004472	OR10R2	0	0	0	0	0	0	0	0	0	0	0	0	0	Yes
NM_001004473	OR10K1	0	0	0	0	0	0	0	0	0	0	0	0	0	Yes
NM_001004474	OR10S1	0	0	0	0	0.0393228	0.0127244	0.0152145	0	0	0	0	0	0	Yes
NM_001004475	OR10T2	0	0	0	0	0	0	0	0	0	0	0	0	0	Yes
NM_001004476	OR10K2	0	0	0	0	0	0	0	0	0	0	0	0	0	Yes
NM_001004477	OR10X1	0	0	0	0	0	0	0	0	0	0	0	0	0	Yes
NM_001004478	OR10Z1	0	0	0	0	0	0	0	0	0	0	0	0	0	Yes
NM_001004479	OR11H4	0	0	0	0	0	0	0.0155418	0	0	0	0	0	0	Yes
NM_001004480	OR11H6	0	0	0	0	0	0	0	0	0	0	0	0	0	Yes
NM_001004481	OR13C2	0	0	0	0	0	0	0	0	0	0	0	0	0	Yes
NM_001004482	OR13C5	0	0	0	0	0	0	0	0	0	0	0	0	0	Yes
NM_001004483	OR13C8	0	0	0	0	0	0	0	0	0	0	0	0	0	Yes
NM_001004484	OR13D1	0	0	0	0	0	0	0	0	0	0	0	0	0	Yes
NM_001004485	OR13F1	0	0	0	0	0	0	0	0	0	0	0	0	0	Yes
NM_001004486	OR13H1	0	0	0	0	0	0	0	0	0	0	0	0	0	Yes
NM_001004487	OR13J1	0	0.00729788	0.0233636	0	0	0.0359892	0.00806852	0.0205024	0	0.105604	0	0.1207	0	Yes
NM_001004488	OR2A25	0	0.0146895	0	0	0	0.0090551	0	0	0	0.0303665	0	0.0242952	0.034015	Yes
NM_001004489	OR2AG1	0	0	0	0	0	0	0	0	0	0	0	0	0	Yes
NM_001004490	OR2AG2	0.0196634	0.136912	0.0153794	0.00449797	0.144135	0.124374	0	0	0	0.0297924	0	0.0595895	0.016686	Yes
NM_001004491	OR2AK2	0	0	0.0435317	0	0	0	0	0	0	0	0	0	0	Yes
NM_001004492	OR2B11	0	0	0	0	0.0410522	0	0	0	0	0	0	0	0	Yes
NM_001004684	OR2D3	0	0.00690142	0	0	0	0.00850852	0	0	0	0.0570671	0	0	0	Yes
NM_001004685	OR2F2	0	0	0	0	0	0	0	0	0	0	0	0	0	Yes
NM_001004686	OR2L2	0	0	0.0322493	0	0	0	0	0	0	0	0	0	0	Yes
NM_001004687	OR2L3	0	0	0	0	0	0	0	0	0	0	0	0	0	Yes
NM_001004688	OR2M2	0	0	0	0	0	0	0	0	0	0	0	0	0	Yes
NM_001004689	OR2M3	0	0	0	0	0	0	0	0	0	0	0	0	0	Yes
NM_001004690	OR2M5	0	0	0	0	0	0	0	0	0	0	0	0	0	Yes
NM_001004691	OR2M7	0	0	0	0	0	0	0	0	0	0	0	0	0	Yes
NM_001004692	OR2T12	0	0	0.00759396	0	0	0	0	0	0	0	0	0	0.0329565	Yes
NM_001004693	OR2T10	0	0	0	0	0	0	0	0	0	0	0	0	0	Yes
NM_001004694	OR2T29	0	0	0	0	0	0	0	0	0	0	0	0	0	Yes
NM_001004695	OR2T33	0	0	0.151879	0	0	0	0	0	0	0.0882645	0.0386175	0	0.0823912	Yes
NM_001004696	OR2T4	0	0	0	0	0	0	0	0	0	0	0	0	0	Yes
NM_001004697	OR2T5	0	0	0	0	0	0	0	0	0	0	0	0	0	Yes
NM_001004698	OR2W5	0	0	0	0	0	0	0	0	0	0	0	0	0	Yes
NM_001004699	OR2Z1	0	0	0	0	0	0	0	0	0	0	0	0	0	Yes
NM_001004700	OR4C11	0	0	0	0	0	0	0	0	0	0	0	0	0	Yes
NM_001004701	OR4C16	0	0	0	0	0	0	0	0	0	0	0	0	0	Yes
NM_001004702	OR4C3	0	0	0	0	0	0	0	0	0	0	0	0	0	Yes
NM_001004703	OR4C46	0	0	0	0	0	0	0	0	0	0	0	0	0	Yes
NM_001004704	OR4C6	0	0	0.0157263	0.00919886	0.147387	0	0	0	0	0	0	0	0.0170623	Yes
NM_001004705	OR4D10	0	0	0	0	0	0	0	0	0	0	0	0	0	Yes
NM_001004706	OR4D11	0	0	0	0	0	0	0	0	0	0	0	0	0	Yes
NM_001004707	OR4D2	0	0	0	0	0	0	0	0	0	0	0	0	0	Yes
NM_001004708	OR4D6	0	0	0	0	0	0	0	0	0	0	0	0	0	Yes
NM_001004711	OR4D9	0	0	0	0	0	0	0	0	0	0	0	0	0	Yes
NM_001004712	OR4K14	0	0	0	0	0	0	0	0	0	0	0	0	0	Yes
NM_001004713	OR1I1	0	0	0	0	0	0	0	0	0	0	0	0	0	Yes
NM_001004714	OR4K13	0	0	0	0	0	0	0	0	0	0	0	0	0	Yes
NM_001004715	OR4K17	0	0	0	0	0	0	0	0	0	0	0	0	0	Yes
NM_001004717	OR4L1	0	0	0.0155757	0	0	0	0	0	0	0	0	0	0	Yes
NM_001004719	OR4M2	0	0	0	0	0	0	0	0	0	0	0	0	0	Yes
NM_001004720	NCK2	23.149	10.5845	20.0823	11.349	14.2567	15.1277	20.4663	15.6313	23.6118	26.5743	25.5542	12.1411	18.2569	Yes
NM_001004722	NCK2	24.0992	11.7524	20.6718	11.5894	15.5054	16.379	21.1723	18.9402	26.3484	27.7632	26.8392	13.7992	19.3993	Yes
NM_001004723	OR4N2	0.0202373	0	0	0	0	0	0	0	0	0	0	0	0	Yes
NM_001004724	OR4N5	0	0	0	0	0	0	0	0	0	0	0	0	0	Yes
NM_001004725	OR4S1	0	0	0	0	0	0	0	0	0	0	0	0	0	Yes
NM_001004726	OR4X1	0	0	0	0	0	0	0	0	0	0	0	0	0	Yes
NM_001004727	OR4X2	0	0	0	0.00469011	0	0	0	0	0	0.031065	0	0	0	Yes
NM_001004728	OR5A1	0	0	0	0	0	0	0	0	0	0	0	0	0	Yes
NM_001004729	OR5AN1	0	0	0	0	0	0	0	0	0	0	0	0	0	Yes
NM_001004730	OR5AR1	0	0	0	0	0	0	0	0	0	0	0	0	0	Yes
NM_001004731	OR5AU1	0	0	0	0	0	0	0	0	0	0	0	0	0	Yes
NM_001004733	OR5B12	0	0	0	0.00811766	0	0	0	0	0	0	0	0	0	Yes
NM_001004734	OR14I1	0	0	0	0	0	0	0	0	0	0	0	0	0	Yes
NM_001004735	OR5D14	0	0	0	0	0	0	0	0	0	0	0	0	0	Yes
NM_001004736	OR5K1	0	0.0287933	0	0	0	0.00443728	0	0	0	0	0	0	0	Yes
NM_001004737	OR5K2	0	0.0864707	0.0230691	0	0	0.0133258	0	0	0	0	0	0.0595895	0.0333719	Yes
NM_001004738	OR5L1	0	0	0	0	0	0	0	0	0	0	0	0	0	Yes
NM_001004739	OR5L2	0	0	0	0	0	0	0	0	0	0	0	0	0	Yes
NM_001004740	OR5M1	0	0	0	0	0	0	0	0	0	0	0	0	0	Yes
NM_001004741	OR5M10	0	0	0	0	0	0	0	0	0	0	0	0	0	Yes
NM_001004742	OR5M3	0	0	0	0	0	0	0	0	0	0	0	0	0	Yes
NM_001004743	OR5M9	0	0	0	0	0	0	0	0	0	0	0	0	0	Yes
NM_001004744	OR5R1	0	0	0	0	0	0	0	0	0	0	0	0	0	Yes
NM_001004745	OR5T1	0	0	0	0	0	0	0	0	0	0	0	0	0	Yes
NM_001004746	OR5T2	0	0	0	0	0	0.0234712	0	0	0	0	0	0	0	Yes
NM_001004747	OR5T3	0	0	0	0	0	0	0	0	0	0	0	0	0	Yes
NM_001004748	OR51A2	0	0	0	0	0	0	0	0	0	0	0	0	0	Yes
NM_001004749	OR51A7	0	0	0	0	0	0	0	0	0	0	0	0	0	Yes
NM_001004750	OR51B6	0	0	0	0	0	0	0	0	0	0	0	0	0	Yes
NM_001004751	OR51D1	0	0	0	0	0	0	0	0	0	0	0	0	0	Yes
NM_001004752	OR51F1	0	0	0	0	0	0	0	0	0	0	0	0	0	Yes
NM_001004753	OR51F2	0	0	0	0	0	0	0	0	0	0	0	0	0	Yes
NM_001004754	OR51I2	0	0	0	0	0	0	0	0	0	0	0	0	0	Yes
NM_001004755	OR51L1	0	0	0	0	0	0	0	0	0	0	0	0	0	Yes
NM_001004756	OR51M1	0	0	0	0	0	0	0	0	0	0	0	0	0	Yes
NM_001004757	OR51Q1	0	0.00625343	0	0	0	0	0	0	0	0	0	0	0	Yes
NM_001004758	OR51S1	0	0	0	0	0	0	0	0	0	0	0	0	0	Yes
NM_001004759	OR51T1	0	0	0	0	0	0	0	0	0	0	0	0	0	Yes
NM_001004760	OR51V1	0	0	0	0	0	0	0	0	0	0	0	0	0	Yes
NM_001005	RPS3	924.178	443.805	843.188	1098.18	549.099	744.661	1066.35	643.599	1453.66	829.682	1394.86	1199.7	886.883	Yes
NM_001005158	SFMBT1	2.23686	4.80011	8.18989	5.04936	13.2762	3.84447	2.54535	2.51208	2.45693	3.57924	5.51397	2.70185	9.20851	Yes
NM_001005159	SFMBT1	2.14215	4.60753	7.89528	4.88236	12.7263	3.70969	2.45568	2.44956	2.37181	3.43706	5.33861	2.62498	8.95698	Yes
NM_001005160	OR52A5	0	0	0	0	0	0	0	0	0	0	0	0	0	Yes
NM_001005161	OR52B4	0	0	0	0	0	0.00751775	0	0.0171309	0	0	0	0	0	Yes
NM_001005162	OR52B6	0	0	0	0	0	0	0	0	0	0	0	0	0	Yes
NM_001005163	OR52D1	0	0	0	0	0	0.00794128	0	0	0	0.0266313	0	0	0	Yes
NM_001005164	OR52E2	0	0	0	0	0	0	0	0	0	0	0	0	0	Yes
NM_001005165	OR52E4	0	0	0	0	0	0	0	0	0	0	0	0	0	Yes
NM_001005167	OR52E6	0	0	0	0	0	0	0	0	0	0	0	0	0	Yes
NM_001005168	OR52E8	0	0	0	0	0	0	0	0	0	0	0	0	0	Yes
NM_001005169	OR52I1	0	0	0	0	0	0	0	0	0	0	0.0190713	0	0	Yes
NM_001005170	OR52I2	0	0	0	0	0	0	0	0	0	0	0	0	0	Yes
NM_001005171	OR52K1	0	0	0	0	0	0	0	0	0	0	0	0	0	Yes
NM_001005172	OR52K2	0	0	0	0	0	0	0	0	0	0	0	0	0	Yes
NM_001005173	OR52L1	0	0	0	0	0	0	0	0.00880014	0	0	0	0	0	Yes
NM_001005174	OR52N2	0	0	0.0605632	0	0.0202714	0	0	0	0	0	0	0	0	Yes
NM_001005175	OR52N4	0	0	0	0	0	0	0	0	0	0	0	0	0	Yes
NM_001005176	SP140	0	0.26918	0	0.0610997	0.0116542	0.150847	0.0180366	0.0572898	0	0.0337245	0	0.0269818	0.0377765	Yes
NM_001005177	OR52R1	0	0	0	0	0	0	0	0	0	0	0	0	0	Yes
NM_001005178	OR52W1	0	0.0142324	0.0227819	0.00888396	0	0	0.0236029	0	0.00719294	0	0.077235	0	0.0164782	Yes
NM_001005179	OR56A4	0	0	0	0.00779266	0	0	0	0	0	0	0	0	0	Yes
NM_001005180	OR56B1	0	0	0	0	0	0	0	0	0	0	0	0	0	Yes
NM_001005181	OR56B4	0	0.0142768	0.0152353	0	0.0203979	0.013201	0.0157844	0	0	0.0885401	0	0	0.0330594	Yes
NM_001005182	OR6C1	0	0	0	0	0	0	0	0	0	0	0	0	0	Yes
NM_001005183	OR6C76	0	0	0	0	0	0	0	0	0	0	0	0	0	Yes
NM_001005184	OR6K6	0.0181215	0	0	0	0	0	0	0	0	0	0	0	0	Yes
NM_001005185	OR6N1	0	0	0	0	0	0	0	0	0	0	0	0	0	Yes
NM_001005186	OR6Q1	0	0	0	0	0	0	0	0.0100902	0	0	0	0	0	Yes
NM_001005187	OR6T1	0	0	0	0	0	0	0	0	0	0	0	0	0	Yes
NM_001005188	OR6X1	0	0	0	0	0	0	0	0	0	0	0	0	0	Yes
NM_001005189	OR6Y1	0	0	0	0	0	0	0	0	0	0	0	0	0	Yes
NM_001005190	OR7A10	0	0	0	0	0	0	0	0	0	0	0	0	0	Yes
NM_001005191	OR7D4	0	0	0	0	0	0	0	0	0	0	0	0.0110908	0	Yes
NM_001005192	OR7G1	0	0	0	0	0	0	0	0	0	0	0	0	0	Yes
NM_001005193	OR7G2	0	0	0	0	0	0	0	0	0	0.0272977	0	0	0	Yes
NM_001005194	OR8A1	0	0	0	0	0	0	0	0	0	0	0	0	0	Yes
NM_001005195	OR8B12	0	0	0	0	0	0	0	0	0	0	0	0	0	Yes
NM_001005196	OR8B4	0	0	0	0	0	0	0	0	0	0	0	0	0	Yes
NM_001005197	OR8D4	0	0	0	0	0	0	0	0	0	0	0	0	0	Yes
NM_001005198	OR8G5	0.0808426	0	0	0	0	0	0	0	0	0	0	0.0217771	0	Yes
NM_001005199	OR8H1	0	0	0	0	0	0	0	0	0	0	0	0	0	Yes
NM_001005200	OR8H2	0	0	0	0	0	0	0	0	0	0	0	0	0	Yes
NM_001005201	OR8H3	0	0	0	0	0	0	0	0	0	0	0	0	0	Yes
NM_001005202	OR8K3	0	0	0	0	0	0	0	0	0	0	0	0	0	Yes
NM_001005203	OR8S1	0	0.0253605	0	0	0	0	0	0	0	0	0	0	0	Yes
NM_001005204	OR8U1	0	0	0	0	0	0	0	0	0	0	0	0	0	Yes
NM_001005205	OR8J1	0	0	0	0	0	0	0	0	0	0	0	0	0	Yes
NM_001005207	TRIM37	16.5948	13.0195	9.85254	7.14305	15.5883	13.4929	5.26932	1.56062	1.4656	6.53977	9.58017	1.56655	2.99997	Yes
NM_001005209	TMEM198	5.97038	1.13253	0.573001	2.30188	1.53874	1.10141	1.42954	3.45046	0.302563	28.8344	4.01076	3.27156	0.650264	Yes
NM_001005210	LRRC55	0.00346081	0.00253652	0	0	0	0	0	0	0	0.0157306	0	0	0	Yes
NM_001005211	OR9I1	0	0	0	0	0.0207214	0	0	0	0	0	0	0	0	Yes
NM_001005212	OR9Q1	0	0	0	0	0	0	0	0.0157905	0	0	0	0	0	Yes
NM_001005213	OR9G1	0	0	0	0	0	0	0	0	0	0	0	0.0123459	0	No
NM_001005214	LRRC52	0	0	0	0	0	0	0	0	0	0	0	0	0	Yes
NM_001005216	OR2J3	0	0	0	0	0.0209204	0.0496436	0	0	0	0	0	0	0	Yes
NM_001005217	FRG2	0.0313936	0.00657404	0.0315693	0.0123107	0.0187853	0.109416	0.0145365	0.00923445	0	0.32616	0.00891884	0	0.0152228	Yes
NM_001005218	OR5B21	0	0	0	0	0	0	0	0	0	0	0	0	0	Yes
NM_001005226	OR2B3	0	0	0	0	0	0.00763999	0	0	0	0	0	0	0	Yes
NM_001005234	OR1L3	0	0	0	0	0	0	0	0	0	0	0	0	0	Yes
NM_001005235	OR1L4	0	0	0	0	0	0	0	0	0	0	0	0	0	Yes
NM_001005236	OR1L1	0	0	0	0	0	0	0	0	0	0	0	0	0	Yes
NM_001005237	OR51G1	0	0	0	0	0	0	0	0	0	0	0	0	0	Yes
NM_001005238	OR51G2	0	0	0	0	0	0	0	0	0	0	0	0	0	Yes
NM_001005239	OR11H1	0	0	0	0	0.00998086	0.00861249	0	0	0.0211833	0	0	0.0346614	0	Yes
NM_001005240	OR4F17	0.0203695	0	0	0	0	0	0	0	0	0	0	0	0.0345702	Yes
NM_001005241	OR4N4	0.0348206	0	0	0	0	0	0	0	0	0	0	0	0	Yes
NM_001005242	PKP2	34.2845	32.8502	19.1555	49.4936	6.13483	11.2521	30.2709	18.4871	13.2468	11.1513	51.2952	3.43527	61.1059	Yes
NM_001005243	OR9K2	0	0	0	0	0	0	0	0	0	0	0	0	0	Yes
NM_001005245	OR5M11	0	0	0	0	0	0.0184058	0	0.0209709	0	0	0	0	0	Yes
NM_001005270	OR4C12	0	0	0	0	0	0	0	0	0	0	0	0	0	Yes
NM_001005271	CHD3	44.1722	30.7244	16.9995	16.9765	27.9588	36.4584	7.9506	12.1983	24.0833	0.98198	10.2886	4.39932	13.3886	Yes
NM_001005272	OR4A5	0	0	0	0	0	0	0	0	0	0	0	0	0	Yes
NM_001005273	CHD3	44.3067	30.8016	17.0754	17.0562	28.0209	36.5141	7.98088	12.2424	24.1593	0.987772	10.3342	4.41664	13.4219	Yes
NM_001005274	OR4A16	0	0	0	0	0	0	0	0	0	0	0	0	0	Yes
NM_001005275	OR4A15	0	0	0	0	0	0	0	0	0	0	0	0	0	Yes
NM_001005276	OR2AE1	0	0.0141007	0.0300949	0.00880178	0	0	0	0.0198071	0	0	0	0	0	Yes
NM_001005278	OR6N2	0	0	0	0	0	0	0	0	0	0	0	0	0	Yes
NM_001005279	OR6K2	0	0	0	0	0	0	0	0	0	0	0	0	0	Yes
NM_001005280	OR10A7	0	0	0	0	0	0	0	0	0	0	0	0	0	Yes
NM_001005281	OR6B1	0	0	0	0	0	0	0	0	0	0	0	0	0	Yes
NM_001005282	OR5M8	0	0	0	0	0	0	0	0	0	0	0	0	0	Yes
NM_001005283	OR9Q2	0	0	0	0	0	0	0	0	0	0	0	0	0	Yes
NM_001005284	OR9G4	0	0	0	0	0	0	0	0	0	0	0	0	0	Yes
NM_001005285	OR2AT4	0	0	0	0	0	0	0	0	0	0	0	0	0	Yes
NM_001005286	OR6F1	0	0	0	0	0	0	0	0	0	0	0	0	0	Yes
NM_001005287	OR2A1	0	0.15424	0.062703	0.00458466	0.146913	0.0588582	0.0324814	0	0.0668158	0.227749	0	0.0485903	0	Yes
NM_001005288	OR51I1	0	0	0	0	0	0	0	0	0	0.0139992	0	0	0.0313623	Yes
NM_001005289	OR52H1	0	0.00711619	0	0	0	0.0087733	0	0	0	0	0	0	0	Yes
NM_001005290	PSRC1	39.4111	21.6921	4.33368	9.8381	25.232	17.4207	16.3615	22.9817	9.14849	14.672	10.6686	22.0786	11.6027	Yes
NM_001005291	SREBF1	23.268	43.9349	40.8442	54.009	57.8	56.3488	79.77	43.8837	64.244	16.0283	35.1401	63.8382	35.6836	Yes
NM_001005323	OR5AK2	0	0	0	0	0	0	0	0	0	0	0	0	0	Yes
NM_001005324	OR10V1	0	0	0	0	0	0	0	0	0	0	0	0	0	Yes
NM_001005325	OR6M1	0	0	0	0	0	0	0	0	0.21324	0	0	0	0	Yes
NM_001005326	OR4F6	0	0	0	0	0	0	0	0	0	0	0	0	0	Yes
NM_001005327	OR6K3	0	0	0	0	0	0	0	0	0	0	0	0	0	Yes
NM_001005328	OR2A7	0.0100212	1.20454	2.68055	0.696868	2.90678	2.02382	2.2737	0.402366	3.11064	2.45969	4.94238	1.84643	1.78579	Yes
NM_001005329	OR51A4	0	0	0	0	0	0	0	0	0	0	0	0	0	Yes
NM_001005332	MAGED1	0	0	0	0	0	0	0	0	0	0	0	0	0	Yes
NM_001005333	MAGED1	0	0	0	0	0	0	0	0	0	0	0	0	0	Yes
NM_001005335	HNRNPL	108.863	89.9878	68.5754	66.9576	86.5963	68.5595	75.4036	71.9506	111.79	70.5465	58.514	144.513	92.8024	Yes
NM_001005336	DNM1	32.2475	0.255626	13.3331	33.0297	0.996885	11.485	1.21619	0.626909	0.387575	2.39962	7.78316	10.1711	0.266853	Yes
NM_001005337	PKP1	0.00346787	0.221127	5.43551	0.661587	0	0.973752	0.673014	0.0446283	0.39821	3.08949	1.14482	0.00630558	0.291333	Yes
NM_001005338	OR5H1	0	0	0	0	0	0	0	0	0	0	0	0	0	Yes
NM_001005339	RGS10	18.6887	25.5609	53.5635	11.0891	23.7536	73.7446	14.8768	6.74212	29.2463	6.84877	17.5693	36.097	25.7411	Yes
NM_001005340	GPNMB	0.36401	0.906598	4.38655	0	0.296471	0.507082	0.00819345	1.13816	0	6.94505	0.0536222	1.34826	0.148725	Yes
NM_001005353	AK4	6.69777	3.11756	5.21868	19.457	4.65012	7.47696	0.13969	1.71013	0.0594003	3.81458	16.3813	2.07834	1.62388	Yes
NM_001005354	PRR13	71.0593	31.5011	63.2264	198.653	62.7128	88.0012	110.021	131.636	65.1491	77.0569	158.012	26.4664	217.317	Yes
NM_001005356	POTEG	0.521867	0	0	0.00663201	0	0	0	0	0	0.0073212	0	0	0	Yes
NM_001005360	DNM2	34.7685	51.3245	85.8932	86.4079	63.0818	62.3081	57.5958	15.6264	63.1431	56.3785	56.6638	47.879	59.6496	Yes
NM_001005361	DNM2	33.8648	49.1774	83.2326	83.3999	60.8276	60.0613	55.5429	15.4225	61.2944	53.9438	54.6444	46.8605	57.6118	Yes
NM_001005362	DNM2	33.633	48.8603	82.8537	82.5085	60.2932	59.5591	55.0004	15.4378	60.5337	53.3975	54.0626	46.597	57.0979	Yes
NM_001005365	POTEA	0	0	0	0	0.00492523	0	0	0.0532651	0	0	0	0	0	Yes
NM_001005366	KDM2B	26.1849	8.28378	8.64462	17.4449	10.7912	11.25	4.91606	4.08623	4.86185	6.34058	12.9802	3.92899	10.8746	Yes
NM_001005367	TTYH1	0.0850434	0.223656	0.42648	0.0503503	0.00523849	0.718726	0.036483	0.154508	0.181596	1.15966	0.0696394	0.145537	0.348095	Yes
NM_001005368	ZNF32	13.7872	15.1888	8.63889	3.2231	6.37688	31.3488	17.7305	13.7945	8.08486	8.56754	14.1494	27.4372	13.9208	Yes
NM_001005369	MTIF2	45.3315	37.1079	8.20665	35.1488	30.7122	27.414	22.6842	8.76545	23.9463	20.3298	29.5709	23.6824	22.2797	Yes
NM_001005373	LRSAM1	18.0025	14.0617	14.0988	18.7766	10.4655	15.0365	17.7751	5.45299	9.47849	8.25745	15.9906	12.7909	8.65363	Yes
NM_001005374	LRSAM1	18.8725	14.5859	14.603	19.3125	10.827	15.624	18.5153	5.98071	10.1961	8.38247	16.6332	13.8549	9.19078	Yes
NM_001005375	DAZ4	0	0	0	0	0	0	0	0	0	0	0	0	0	Yes
NM_001005376	PLAUR	0.935328	24.7646	35.1093	5.8689	69.411	18.4057	17.9163	5.1424	32.1052	115.782	3.87515	14.4323	51.6456	Yes
NM_001005377	PLAUR	1.64322	25.5612	41.0497	6.41408	81.5826	19.837	20.5056	8.12035	40.893	136.404	4.91483	18.3414	62.0453	Yes
NM_001005386	ACTR2	67.1286	125.302	63.6262	84.3178	94.1407	74.0516	76.8491	59.8506	40.7502	71.8652	78.9016	32.3415	63.4153	Yes
NM_001005388	NFASC	1.0485	0.0139001	0.0169523	0.0322271	0	0.00163208	0.0278085	0.0613649	0.0327832	0.426913	0.316094	0.0109474	0.0444486	Yes
NM_001005389	NFASC	1.84157	0.0244418	0.0608599	0.103407	0	0.00334816	0.123104	0.190739	0.109802	1.08913	0.257908	0.00898325	0.157215	Yes
NM_001005404	YPEL2	1.34043	0.716522	1.42861	1.47342	1.47477	3.35989	0.545985	0.364323	0.264808	0.373688	1.34351	0.285975	0.458018	Yes
NM_001005405	KRTAP5-11	0	0.00671234	0	0.0125697	0	0.0041377	0	0	0	0.0138759	0.0364259	0	0	Yes
NM_001005407	CACNA1H	0.0173244	0.0237019	0.0135499	0.230906	0.0665185	6.57374	0.057089	0.129608	0.598082	0.0752456	0.463962	0.00700015	0.764457	Yes
NM_001005408	NEURL4	11.9126	11.5949	8.54161	7.99539	8.73831	7.41205	5.45175	10.5702	6.77162	5.64525	6.29862	6.99479	4.27768	Yes
NM_001005409	SF3A1	46.6492	42.2319	45.654	35.0235	66.3887	35.3019	43.4496	15.8516	37.3167	44.5095	33.2453	18.8294	19.4986	Yes
NM_001005413	ZWINT	72.5444	57.0755	64.4623	62.771	87.826	51.6747	58.2431	34.1554	51.7599	67.045	49.4698	42.9924	64.1431	Yes
NM_001005415	MARCH2	3.12218	5.97836	11.1157	1.51186	5.59058	19.4552	5.42682	1.60023	5.60226	8.73396	4.15279	11.0182	7.43213	Yes
NM_001005416	MARCH2	3.09335	5.779	10.7938	1.42249	5.60188	18.7772	5.22639	1.5431	5.4397	8.79377	4.01128	10.5147	7.42835	Yes
NM_001005417	B4GALT2	64.4433	20.1536	38.2483	29.4783	39.2633	18.2208	31.4125	33.0054	27.4015	18.1795	20.0483	39.8882	25.9247	Yes
NM_001005463	EBF3	0.0211377	0.00309847	0	0.00193409	0	0.010505	0	0	0	0	0	0	0	Yes
NM_001005464	HIST2H3A	5.32475	0.486142	0.475549	0.783922	0.713867	0.299674	0.313529	5.74755	2.08839	2.09368	1.53892	1.98776	0.906822	Yes
NM_001005465	OR10G3	0	0	0	0	0	0	0	0	0	0	0	0	0	Yes
NM_001005466	OR10G2	0	0	0	0	0	0	0	0	0	0	0	0	0	Yes
NM_001005467	OR8B3	0	0	0	0	0	0	0	0	0	0	0	0	0	Yes
NM_001005468	OR8B2	0	0	0	0	0	0	0	0	0	0	0	0	0	Yes
NM_001005469	OR5B3	0	0	0	0	0	0	0	0	0	0	0	0	0	Yes
NM_001005470	OR4B1	0	0	0	0	0	0	0	0	0	0	0	0	0	Yes
NM_001005471	OR2T6	0	0	0	0	0	0	0	0	0	0	0	0	0	Yes
NM_001005473	PLCXD3	0	0	0.028367	0	0	0	0	0	0	0.0109903	0.0432763	0	0	Yes
NM_001005474	NFKBIZ	1.61079	4.13115	5.11825	2.42793	1.20519	1.37773	3.17844	3.51925	1.27166	1.99714	4.62162	0.611114	3.03844	Yes
NM_001005476	PKP4	26.9099	27.8564	17.1908	19.1508	20.2891	16.8102	16.8729	10.1736	15.8946	45.0906	15.1127	13.3482	21.6337	Yes
NM_001005479	OR5H6	0	0	0	0	0	0	0	0	0	0.0144854	0	0	0	Yes
NM_001005480	OR2A2	0	0	0.015283	0	0.0204618	0	0	0	0	0	0	0	0	Yes
NM_001005482	OR5H2	0	0	0	0	0	0	0	0	0	0	0	0	0	Yes
NM_001005483	OR4K5	0	0	0	0	0	0	0	0	0	0	0	0	0	Yes
NM_001005484	OR4F5	0.0203695	0	0	0	0	0	0	0	0	0	0	0	0.0345702	Yes
NM_001005486	OR4K15	0	0	0	0	0	0	0	0	0	0	0	0	0	Yes
NM_001005487	OR13G1	0	0	0	0	0	0	0	0	0	0	0	0	0	Yes
NM_001005489	OR5B17	0	0	0	0	0	0	0	0	0	0	0	0	0	Yes
NM_001005490	OR6C74	0	0	0	0	0	0	0	0	0	0	0	0	0	Yes
NM_001005491	OR10AG1	0	0	0	0	0	0	0	0	0	0	0	0	0	Yes
NM_001005492	OR5J2	0	0	0	0	0	0	0	0	0	0	0	0	0	Yes
NM_001005493	OR6C6	0	0	0	0	0	0	0	0	0	0	0	0	0	Yes
NM_001005494	OR6C4	0	0	0	0	0	0	0	0	0	0	0	0	0	Yes
NM_001005495	OR2T3	0.0195402	0	0	0	0	0	0	0	0	0	0	0	0	Yes
NM_001005496	OR5D16	0	0	0	0	0	0	0	0	0	0	0	0	0	Yes
NM_001005497	OR6C75	0	0	0	0	0	0	0	0	0	0	0	0	0	Yes
NM_001005498	RHBDF2	13.8463	11.6586	18.0148	10.9767	5.01813	9.03417	25.7773	12.0027	32.2297	19.5283	15.4459	13.1685	10.9373	Yes
NM_001005499	OR6C70	0	0	0	0	0	0	0	0	0	0	0	0	0	Yes
NM_001005500	OR4M1	0	0	0	0	0	0	0	0	0	0	0	0	0	Yes
NM_001005501	OR4K2	0	0	0	0	0	0	0	0	0	0	0	0	0	Yes
NM_001005502	CPM	0.176068	0.0856856	2.09317	1.53819	0.87761	1.91741	0.061634	0.0551051	0.0240003	0.134449	0.0392161	0.0221965	0.0573726	Yes
NM_001005503	OR11G2	0	0	0	0	0	0	0	0	0	0	0	0.0218399	0	Yes
NM_001005504	OR4F21	0.0995721	0.00729788	0	0.00911078	0	0	0.016137	0.0205024	0.0147532	0	0	0.156911	0	Yes
NM_001005505	CACNA2D2	2.11204	0.299647	1.56753	0.18943	0.136634	0.578503	0.243885	0.137915	0.10053	0.682699	0.494749	0.93424	0.537374	Yes
NM_001005512	OR4A47	0	0	0	0	0	0	0	0	0	0	0	0	0	Yes
NM_001005513	OR4C45	0	0	0	0	0	0	0	0	0	0	0	0	0	Yes
NM_001005514	OR5H14	0	0	0	0	0	0	0	0	0	0.0151833	0	0	0	Yes
NM_001005515	OR5H15	0	0	0	0	0	0	0	0	0	0	0	0	0	Yes
NM_001005516	OR5K3	0	0	0	0	0	0	0	0	0	0	0	0	0	Yes
NM_001005517	OR5K4	0	0	0	0	0	0	0	0	0	0	0	0	0	Yes
NM_001005518	OR6C65	0	0	0	0	0	0	0	0	0	0	0	0	0	Yes
NM_001005519	OR6C68	0	0	0	0	0	0	0	0	0	0	0	0	0	Yes
NM_001005522	OR2T8	0	0.0145958	0.249211	0	0	0	0	0	0	0.135777	0.0396035	0	0.0675959	Yes
NM_001005526	SF3B1	35.4109	54.4176	60.0452	57.9832	60.7423	40.0677	24.4698	2.55211	6.60009	44.4783	50.2239	4.5347	24.2737	Yes
NM_001005527	FAM19A4	0.0253195	0	0.0264043	0	0	0	0	0	0	0	0	0	0	Yes
NM_001005566	OR5B2	0	0	0	0	0	0	0	0	0	0	0	0	0	Yes
NM_001005567	OR51B5	0	0.0141056	0.0100351	0.0264144	0.00671776	0.272447	0	0	0.128319	1.26357	0	0.0233294	0.174202	Yes
NM_001005609	EDA	0	0	0	0	0	0	0	0	0	0	0	0	0	Yes
NM_001005610	EDA	0	0	0	0	0	0	0	0	0	0	0	0	0	Yes
NM_001005612	EDA	0	0	0	0	0	0	0	0	0	0	0	0	0	Yes
NM_001005613	EDA	0	0	0	0	0	0	0	0	0	0	0	0	0	Yes
NM_001005619	ITGB4	0.59479	75.5296	85.3586	45.1568	151.26	39.5624	170.073	20.206	408.08	253.808	34.2571	167.926	64.3388	Yes
NM_001005731	ITGB4	0.594349	75.8169	85.6054	45.2672	151.852	39.7279	170.278	20.1306	407.134	254.373	34.2804	167.452	64.3194	Yes
NM_001005735	CHEK2	18.0139	12.309	14.389	14.208	16.1722	13.2984	12.5031	14.0766	22.7129	10.6837	13.3539	14.9314	13.7438	Yes
NM_001005738	FPR2	0	0.00358225	0	0	0	0.00441643	0.0475263	0	0	0.0296212	0	0	0	Yes
NM_001005739	VPS54	14.0361	31.0208	14.7809	10.5863	12.5119	8.7209	8.44554	4.96452	5.92028	9.61085	10.4921	4.39755	7.97643	Yes
NM_001005741	GBA	36.9594	29.6818	25.0733	11.4964	22.4767	21.2561	29.5456	75.615	38.6433	34.6195	13.2698	24.0689	34.2064	Yes
NM_001005742	GBA	37.1012	29.685	25.1275	11.4914	22.5131	21.3259	29.6075	76.1129	38.8799	34.6767	13.2882	24.198	34.3107	Yes
NM_001005743	NUMB	10.276	17.1547	12.215	23.1808	40.1107	23.6969	17.0167	11.8759	19.8501	15.9456	30.5239	15.5777	20.9846	Yes
NM_001005744	NUMB	10.3672	17.4782	12.2857	23.0661	40.1397	23.9745	16.9397	12.2345	20.0083	15.9498	30.5969	15.8234	21.0051	Yes
NM_001005745	NUMB	10.4685	17.5504	12.3511	23.2854	40.4786	24.2027	17.1031	12.3486	20.1999	16.1057	30.896	15.9749	21.1785	Yes
NM_001005746	CACNB4	4.3228	0.884494	0.00921755	0	0.973703	0.988231	0.00190995	0.0133465	0.00261924	0.0178559	0.0374991	0.00571435	0.556036	Yes
NM_001005747	CACNB4	4.15797	0.839776	0.00906125	0	0.942634	0.935356	0.00187756	0.0131201	0.00257482	0.0157978	0.0368632	0.00561745	0.538742	Yes
NM_001005751	FAM21A	21.0441	24.037	13.6356	9.28252	27.7656	28.8225	16.8637	8.20394	6.21744	29.5413	15.673	7.39904	20.4415	Yes
NM_001005752	GJB3	0.0902019	21.9684	36.8975	23.3815	85.9661	11.1352	31.4555	9.80549	61.2109	42.8249	11.6704	58.6845	27.6727	Yes
NM_001005753	VPS24	22.1787	28.4419	32.226	30.3281	31.6226	41.1802	48.815	33.6774	27.9062	46.2516	33.0131	17.2937	29.7591	No
NM_001005781	SUMO1	33.3463	28.6424	38.1156	18.8071	42.4689	44.6279	12.678	44.9628	37.3502	39.4823	23.5418	35.3145	44.607	Yes
NM_001005782	SUMO1	48.8817	43.7326	58.3384	29.1216	65.4446	65.7922	19.7893	60.4179	46.4377	60.6596	35.4375	41.9781	63.1364	Yes
NM_001005783	HAO2	0.559939	0.0120704	0.021468	0.198407	0	0	0.00444833	0.0282585	0	0	0	0.0332723	0	Yes
NM_001005785	DAZ2	0	0	0	0	0	0	0	0	0	0	0	0	0	Yes
NM_001005786	DAZ2	0	0	0	0	0	0	0	0	0	0	0	0	0	Yes
NM_001005849	SUMO2	102.901	73.4165	90.3508	63.4751	89.9902	123.397	69.8572	109.4	221.735	74.3907	60.807	65.5942	80.1102	Yes
NM_001005850	ZNF835	0.00337168	0	0	0	0.00353069	0	0	0	0	0	0	0	0	Yes
NM_001005851	ZNF780B	0.835675	0.778665	0.0793788	0.707833	1.6993	0.853161	0.305336	0.510208	0.315145	0.943885	1.33767	1.05619	0.945515	Yes
NM_001005853	OR6B2	0	0	0	0	0.0104268	0	0	0.0615073	0	0	0	0	0	Yes
NM_001005855	ATP8B2	4.63088	4.05405	0.282666	0.0392336	0.750485	1.24261	0.0198545	0	0	0.0649661	0	0.170782	0.010396	Yes
NM_001005861	RYK	22.8277	25.3878	23.4135	15.7618	22.6274	27.5791	13.1437	13.0667	17.3596	23.8896	19.7097	13.5113	15.1432	Yes
NM_001005862	ERBB2	9.80207	58.7447	58.5752	30.7742	32.4192	20.7824	49.0013	23.287	59.9691	41.4227	32.1033	39.1322	20.9724	Yes
NM_001005909	IP6K2	25.2393	23.0376	31.9495	24.3978	18.8806	27.0208	26.348	11.7491	23.6086	33.1444	38.2991	31.2293	33.925	Yes
NM_001005910	IP6K2	23.7635	17.9449	18.4981	57.6311	14.9966	40.5646	34.3336	16.7531	33.8748	38.3585	48.4372	42.0715	24.1396	Yes
NM_001005911	IP6K2	23.6176	17.8724	18.4956	57.5532	14.9461	40.4823	34.3005	16.7393	33.9119	38.3484	48.4194	42.0362	24.0957	Yes
NM_001005914	SEMA3B	1.95725	26.9525	54.7114	2.39074	0.256611	2.93898	6.13767	3.59431	46.1237	292.886	4.94296	77.0831	10.4028	Yes
NM_001005915	ERBB3	0.0355547	16.3389	10.887	24.3586	7.32531	9.75058	9.76682	2.24203	4.27366	15.6895	23.1565	3.31863	12.1438	Yes
NM_001005918	ATP7B	3.8605	3.33171	0.620861	17.029	2.58789	4.22943	13.8648	1.69834	1.47248	2.11179	16.6897	1.47532	1.10777	Yes
NM_001005920	JMJD8	65.2263	47.5953	63.7686	63.1287	36.2372	32.999	63.1713	84.4326	77.5417	54.761	40.7576	85.7438	57.406	Yes
NM_001005922	KRTAP5-1	0.277915	0.472853	0.0543415	0.65389	0.0831491	0.291482	1.02144	0.940112	0.514718	0.541381	1.00668	0.0120316	0.758034	Yes
NM_001006	RPS3A	471.739	245.085	367.331	354.396	257.586	273.215	621.322	217.993	313.293	197.665	395.054	317.21	272.678	Yes
NM_001006109	C3orf37	37.0075	29.1741	41.2311	56.1998	58.5459	47.6696	35.929	31.4995	24.9007	48.2239	42.3874	26.4925	50.5938	Yes
NM_001006114	YBEY	8.78269	6.27482	6.43024	2.24953	7.2764	11.7112	7.84064	6.12026	9.28827	6.79115	4.63768	10.7805	4.4945	No
NM_001006115	IP6K1	14.7322	11.1937	17.6266	8.40312	14.9467	7.67779	8.38848	4.17286	7.10053	16.2075	13.24	10.3604	8.53599	Yes
NM_001006117	RBMY1J	0	0	0	0	0	0	0	0	0	0	0	0	0	Yes
NM_001006118	RBMY1E	0	0	0	0	0	0	0	0	0	0	0	0	0	No
NM_001006120	RBMY1D	0	0	0	0	0	0	0	0	0	0	0	0	0	No
NM_001006121	RBMY1B	0	0	0	0	0	0	0	0	0	0	0	0	0	No
NM_001006600	ERBB2IP	7.30329	17.0889	13.5055	8.00981	20.2703	13.044	8.88488	3.39468	4.00125	14.017	9.71302	4.90149	7.19731	Yes
NM_001006605	FAM69A	4.7732	8.81964	4.77185	5.65469	3.82202	3.48611	5.64759	1.30797	1.18314	0.326254	6.95156	0.752619	2.09526	Yes
NM_001006607	LRRC37A2	3.43438	5.0409	1.57303	1.43176	5.37187	3.56048	2.38977	1.48563	3.32468	2.18361	6.84066	4.2812	2.51332	Yes
NM_001006610	SIAH1	13.4765	6.16969	10.3992	9.18715	8.98752	6.3954	7.19644	4.51303	6.99214	11.0655	9.05317	12.5684	10.0305	Yes
NM_001006612	WBP5	0	0	0	0	0	0	0	0	0	0	0	0	0	Yes
NM_001006613	WBP5	0	0	0	0	0	0	0	0	0	0	0	0	0	Yes
NM_001006614	WBP5	0	0	0	0	0	0	0	0	0	0	0	0	0	Yes
NM_001006616	TSPAN17	9.75526	20.5881	25.9514	8.31954	30.3623	24.2821	30.8065	11.0273	16.456	33.9383	17.1062	13.6319	17.3641	Yes
NM_001006617	MAPKAP1	37.1589	24.0372	35.4619	44.7512	28.7046	37.9159	43.1401	20.9863	16.5219	31.6131	31.6382	13.7003	26.8372	Yes
NM_001006618	MAPKAP1	40.9424	29.9647	35.3178	49.5941	32.2119	40.5402	38.1693	12.5119	10.6249	33.9192	31.1355	6.58699	27.9756	Yes
NM_001006619	MAPKAP1	36.2809	23.4606	34.4527	43.6312	27.8486	37.0561	41.878	20.4617	15.9407	30.7208	30.8479	13.2189	25.9804	Yes
NM_001006620	MAPKAP1	36.9343	23.2233	35.4351	44.1604	28.5184	37.6698	43.9639	22.644	17.6188	31.569	31.9298	14.855	26.924	Yes
NM_001006621	MAPKAP1	36.2108	22.4793	34.8775	43.0931	27.7466	36.9204	43.5285	22.9855	17.7911	30.9261	31.2886	15.1367	26.4626	Yes
NM_001006622	WDR33	20.9791	10.7538	3.98906	6.81784	10.7897	10.2153	4.39097	4.09073	6.03146	9.40793	7.06297	4.19078	4.93622	Yes
NM_001006623	WDR33	17.4814	9.13907	3.35374	5.85548	8.85805	7.88284	3.60501	3.00629	4.12655	7.3816	5.91032	2.69959	3.78404	Yes
NM_001006624	PDPN	0	0	0	0.00162077	0	0	0	0	0	0.0107352	0	0.00429441	0	Yes
NM_001006625	PDPN	0	0	0	0.00162446	0	0	0	0	0	0.0107596	0	0.00430419	0	Yes
NM_001006626	CHRM2	0	0	0	0	0	0	0	0	0	0	0	0	0	Yes
NM_001006627	CHRM2	0	0	0	0	0	0	0	0	0	0	0	0	0	Yes
NM_001006628	CHRM2	0	0	0	0	0	0	0	0	0	0	0	0	0	Yes
NM_001006629	CHRM2	0	0	0	0	0	0	0	0	0	0	0	0	0	Yes
NM_001006630	CHRM2	0	0	0	0	0	0	0	0	0	0	0	0	0	Yes
NM_001006631	CHRM2	0	0	0	0	0	0	0	0	0	0	0	0	0	Yes
NM_001006632	CHRM2	0	0	0	0	0	0	0	0	0	0	0	0	0	Yes
NM_001006634	ARHGAP17	44.2569	15.1967	16.736	13.6113	28.3389	11.3963	9.66372	9.90887	9.30479	15.5069	13.1647	9.67219	13.5236	Yes
NM_001006636	GTDC1	3.84283	2.6568	4.61797	1.12986	4.23777	3.47862	2.49731	1.67725	1.41447	2.30064	1.65088	1.96225	1.17993	Yes
NM_001006638	RAB37	0.0351739	0.451147	0.0660255	0.43931	0.198897	6.97002	0.641297	0.81116	0.0938082	0.682146	1.37101	0.106594	0.501444	Yes
NM_001006639	TCEAL1	0	0	0	0	0	0	0	0	0	0	0	0	0	Yes
NM_001006640	TCEAL1	0	0	0	0	0	0	0	0	0	0	0	0	0	Yes
NM_001006641	SLC25A25	8.79161	10.4006	13.1082	12.1485	9.95208	9.90184	12.9924	8.48586	2.81549	12.6696	8.99595	4.53109	6.4915	Yes
NM_001006642	SLC25A25	9.01689	10.4302	13.4177	12.2226	10.1157	10.0578	13.1458	8.79594	2.91383	12.9404	9.1462	4.70253	6.68489	Yes
NM_001006643	Slc25a25	9.26543	10.6232	13.7848	12.5323	10.4269	10.2438	13.3503	8.87385	2.96929	13.3279	9.39209	4.77537	6.82173	Yes
NM_001006655	FAM149A	0.534181	1.22277	1.62276	0.0265637	5.98692	3.17592	0.0627329	0.394532	0.00573531	0.0117297	0.246334	6.03422	0	Yes
NM_001006656	ZNF473	2.32306	4.18081	5.4268	4.70157	7.83582	4.17602	2.81948	2.85523	2.01363	9.85829	5.97525	3.93495	3.59871	Yes
NM_001006657	WDR35	9.33964	1.22795	3.03764	1.52685	2.93671	0.0109176	0.564588	0.652361	0.756851	4.44026	4.28231	0	1.02984	Yes
NM_001006658	CR2	0	16.2266	2.81991	0	0.0116959	0.291672	0	1.02111	0.00330978	0	0.0799631	0	0	Yes
NM_001006665	RPS6KA1	39.6737	47.6982	40.0237	37.4561	18.6608	17.795	57.5161	28.2841	28.6943	18.9927	31.8743	21.1345	39.8013	Yes
NM_001006666	APOBEC3F	0	2.77627	2.07477	0.00529959	1.55267	2.66913	0.957438	0.0119259	0.609299	2.50979	0.368587	0.674011	0.294895	Yes
NM_001006681	SPIN2B	0	0	0	0	0	0	0	0	0	0	0	0	0	Yes
NM_001006682	SPIN2B	0	0	0	0	0	0	0	0	0	0	0	0	0	Yes
NM_001006683	SPIN2B	0	0	0	0	0	0	0	0	0	0	0	0	0	Yes
NM_001006684	TCEAL8	0	0	0	0	0	0	0	0	0	0	0	0	0	Yes
NM_001006932	RPS6KA2	0.0357678	2.20326	2.149	0.728926	6.72141	19.4013	5.96398	0.483732	3.9289	5.19262	0.278057	3.52575	4.17751	Yes
NM_001006933	TCEAL3	0	0	0	0	0	0	0	0	0	0	0	0	0	Yes
NM_001006935	TCEAL4	0	0	0	0	0	0	0	0	0	0	0	0	0	Yes
NM_001006937	TCEAL4	0	0	0	0	0	0	0	0	0	0	0	0	0	Yes
NM_001006938	TCEAL6	0	0	0	0	0	0	0	0	0	0	0	0	0	Yes
NM_001006939	LRRC18	0.12703	0	0	0	0	0	0	0	0	0.0174968	0	0	0	Yes
NM_001006941	ALG3	62.4294	27.4655	42.4276	83.7668	36.4071	35.4847	55.3779	75.5737	41.0114	48.3301	54.9534	35.0703	88.2775	Yes
NM_001006943	EPHA8	41.2021	0	0.0197002	0.0576166	0	0.00227596	0	0.0726082	0	0.0534274	0.0400724	0.0488519	0.0512972	Yes
NM_001006944	RPS6KA4	9.56571	24.5219	34.2662	12.7602	39.5861	33.7813	33.9992	20.2709	53.5372	35.1906	23.9318	42.29	42.8987	Yes
NM_001006945	C1orf103	8.95125	5.1469	0.00808904	12.9077	16.3426	9.74477	5.29232	14.8056	9.53903	9.04931	6.69473	7.79792	13.3311	No
NM_001006946	SDC1	2.35768	40.948	36.5075	102.284	53.5516	24.9917	79.1156	66.089	35.2353	55.6285	44.359	19.8028	72.9729	Yes
NM_001006947	UHRF1BP1L	7.88719	5.84755	3.00597	2.39028	0.821143	7.31635	0.84969	0.262847	0.422186	3.50212	2.78343	0.602385	3.24974	Yes
NM_001007	RPS4X	0	0	0	0	0	0	0	0	0	0	0	0	0	Yes
NM_001007022	ODF2L	2.22263	4.31799	4.34597	0.134669	5.94148	2.87762	1.53313	3.34015	3.33742	2.22995	1.48044	3.87848	3.40652	Yes
NM_001007023	DIO2	0.0243665	0.00781322	0.00714668	0	0.0207315	0	0.0197446	0.00940724	0.0236925	0.0138443	0	0.0313829	0	Yes
NM_001007024	GOSR1	6.93409	8.74389	6.1694	7.60067	10.6803	7.88772	6.59149	6.59083	5.17535	7.07976	7.95697	4.84147	5.18082	Yes
NM_001007025	GOSR1	6.95795	8.77813	6.1898	7.63025	10.7216	7.91854	6.61492	6.61862	5.19717	7.10689	7.98695	4.86188	5.20267	Yes
NM_001007026	ATN1	59.8158	28.3681	44.7292	28.8423	64.5697	55.8811	22.1723	27.5981	31.3405	43.9873	38.8065	53.2326	57.2167	Yes
NM_001007027	ALG8	31.2969	40.1371	37.4862	32.9892	14.4982	33.967	37.3091	36.0437	70.2634	33.9234	41.2847	15.4528	42.3299	Yes
NM_001007033	CLEC6A	0	0	0	0	0.0121077	0	0	0	0	0	0	0	0	Yes
NM_001007067	SDCBP	24.5559	118.773	114.411	53.6667	108.472	96.8016	45.9602	173.233	22.3464	19.6957	43.96	16.7185	22.3618	Yes
NM_001007068	SDCBP	24.6572	119.306	114.938	53.9306	108.831	97.2295	46.2304	174.402	22.4857	19.78	44.1793	16.819	22.4731	Yes
NM_001007069	SDCBP	24.5516	118.723	114.39	53.6569	108.445	96.7821	45.9462	173.233	22.3464	19.6827	43.9514	16.7185	22.3618	Yes
NM_001007070	SDCBP	24.5856	118.887	114.545	53.7311	108.59	96.9159	46.0062	173.473	22.3773	19.7099	44.0122	16.7417	22.3928	Yes
NM_001007072	ZSCAN2	4.1155	2.63565	1.6485	1.59035	2.84517	4.58075	1.59459	1.37806	2.58267	3.4507	1.03299	3.87478	1.81398	Yes
NM_001007073	RPL32	106.378	57.5709	156.508	92.6162	73.4252	82.6435	118.276	133.549	118.23	108.712	139.74	151.144	90.0393	Yes
NM_001007074	RPL32	103.396	55.7545	153.464	91.1986	71.179	80.3555	116.444	132.259	116.317	105.443	137.76	148.27	87.829	Yes
NM_001007075	KLHL5	0.0134252	6.046	5.15562	0.0256846	5.74858	27.5074	0.23043	1.59828	0.111211	10.738	0.101939	0.523723	1.46857	Yes
NM_001007088	ZNF182	0	0	0	0	0	0	0	0	0	0	0	0	0	Yes
NM_001007089	RESP18	0	0	0.0273837	0	0	0	0	0.0360454	0	0	0	0	0	Yes
NM_001007090	C8orf48	0	0	0	0	0	0	0	0	0	0	0	0	0	Yes
NM_001007094	ZNF37A	8.41143	3.87015	0.00832239	3.06627	7.78581	3.40666	2.85722	1.55559	1.28688	2.67219	3.19	5.9849	1.8104	Yes
NM_001007097	NTRK2	0.0394151	0.317771	0.0267174	0.00601076	0	0.0605461	0.0851702	4.14582	7.56568	22.8324	0.0783842	0.377452	1.41369	Yes
NM_001007098	SCP2	10.7395	9.46309	10.3665	6.38951	15.7481	13.3196	8.4139	2.45142	5.57225	7.72108	18.1799	2.4116	12.0932	Yes
NM_001007099	SCP2	26.9951	45.6456	34.5186	51.077	59.3339	45.4773	76.8073	45.2556	54.9493	29.2827	81.7675	41.8363	60.6801	Yes
NM_001007100	SCP2	27.0342	45.5824	34.526	51.033	59.351	45.4856	76.8454	45.4334	55.1408	29.2487	81.696	41.9334	60.6732	Yes
NM_001007101	ZNF484	1.43637	2.79101	1.11037	0.89248	2.01831	2.80255	0.814742	0.374854	0.274687	0.966668	1.11602	0.566887	0.674632	Yes
NM_001007102	L3MBTL3	8.93474	5.39472	2.30241	1.26034	9.37732	4.27649	3.5225	7.01526	1.90926	1.65254	1.50716	1.77466	2.30146	Yes
NM_001007122	FSD2	0.0186747	0.0136872	0.0116849	0	0	0	0	0.00769046	0.00830087	0	0	0.00905494	0	Yes
NM_001007125	C20orf201	0.0537918	0	0.0673157	0	0	0.0291637	0	0.221521	0	0	0	0.0260824	0	Yes
NM_001007139	IGF2	0	1.46162	0.111004	0.00332976	0.0228644	0.865641	0.0265395	2.46524	0.0121318	0.102003	0.0723702	0.0882258	0.0741136	Yes
NM_001007156	NTRK3	0	0	0	0	0	0	0	0.00465402	0	0	0	0	0	Yes
NM_001007169	ZNF483	0.130906	0.0112876	0.487838	0.00176144	0	0	0	0.0436025	0.00570464	0.0350008	0	0.154016	0.00653436	Yes
NM_001007176	C8orf22	0	0	0	0	0	0	0	0	0	0	0	0	0	Yes
NM_001007188	DEPDC5	3.19583	4.56778	2.53519	2.58035	4.527	5.34679	2.77418	0.922194	0.714207	1.67345	2.28708	0.966191	1.04354	Yes
NM_001007189	C5orf53	0.710456	1.60752	2.35013	1.83688	1.58689	1.56222	2.13906	0.848867	0.545641	1.86153	2.67668	0.675536	0.990049	No
NM_001007214	CACYBP	37.4131	26.1042	29.9023	22.3125	27.7434	19.3618	29.9638	19.1452	25.0885	15.9827	17.3344	15.6699	33.4462	Yes
NM_001007225	IGF2BP2	8.60457	18.2426	25.8268	15.3237	24.7028	28.6084	5.06622	9.74451	7.46617	17.861	17.5095	1.92978	24.2987	Yes
NM_001007226	SPOP	27.6931	20.726	23.6066	20.1155	21.3529	15.7167	13.1028	7.19449	6.04433	14.044	17.7435	7.90039	8.8694	Yes
NM_001007227	SPOP	28.8082	21.561	24.5592	20.9101	22.1786	16.3556	13.626	7.49155	6.29157	14.6048	18.4637	8.21898	9.22494	Yes
NM_001007228	SPOP	29.2885	21.9211	24.969	21.2552	22.4932	16.6331	13.8728	7.62725	6.40316	14.8548	18.7727	8.36397	9.39203	Yes
NM_001007229	SPOP	28.8556	21.6028	24.5822	20.9545	22.2321	16.3725	13.6789	7.4973	6.30532	14.6383	18.4761	8.22555	9.24937	Yes
NM_001007230	SPOP	28.3912	21.2545	24.1862	20.6206	21.9274	16.1043	13.4397	7.3662	6.19735	14.3964	18.1776	8.08546	9.08764	Yes
NM_001007231	ARHGAP25	0.00935354	0.598708	0.451135	0.0156905	0.14039	0.273276	0.351177	0.157286	0.00923916	0.00944781	0.0682045	0.956195	0.0423318	Yes
NM_001007232	CARD17	0	0	0	0	0	0	0	0.205024	0	0	0.0792069	0	0.844948	Yes
NM_001007237	IGSF3	1.64744	8.42265	1.85047	5.20161	2.68567	6.48809	2.70992	2.5642	0.843167	1.45867	4.27876	1.2064	2.90182	Yes
NM_001007239	METTL13	22.4387	17.0138	15.5354	17.5366	18.6978	13.1009	22.2231	14.1452	18.6679	14.9222	12.0512	7.35728	18.5586	Yes
NM_001007240	GP2	0	0	0	20.2728	0	0	0.0248364	2.65063	0.00851493	0	0.0838108	0	0	Yes
NM_001007241	GP2	0	0	0	22.9961	0	0	0.0303225	3.16871	0.0103958	0	0.102324	0	0	Yes
NM_001007242	GP2	0	0	0	23.0793	0	0	0.0304748	3.18462	0.010448	0	0.102838	0	0	Yes
NM_001007245	IFRD1	7.6993	18.8704	18.6079	12.7903	29.4843	14.7231	9.0634	18.2876	13.0571	50.7149	15.0684	28.7495	30.2596	Yes
NM_001007246	BRWD1	3.89401	2.63607	5.08897	2.44227	7.21745	17.5243	3.18407	8.16376	2.49403	7.56794	4.24509	3.13255	2.25899	Yes
NM_001007248	ZNF599	0.570169	0.19135	0.140826	0.153765	0.197972	0.0528761	0.138606	0.268786	0.16229	0.42739	0.644524	0.0873037	0.15279	Yes
NM_001007249	OR8G2	0	0	0	0	0	0	0	0	0	0	0	0	0	Yes
NM_001007250	SCP2	25.858	43.1201	32.5996	48.4808	56.1123	43.3916	73.4849	46.3675	54.2577	27.6544	78.3859	42.6907	59.3065	Yes
NM_001007253	ERV3	0.329368	1.7108	2.03623	1.34175	0.962726	2.18036	40.9855	0.654598	0.693823	1.21069	3.65665	8.14484	1.13742	No
NM_001007255	KLHDC9	2.96416	0.669643	1.28737	0.778558	1.59215	1.77405	4.97338	3.48969	3.45666	2.86371	1.92794	8.09089	1.94124	Yes
NM_001007257	PRDM2	6.96889	8.74289	6.33364	3.4907	4.03207	4.73883	4.40925	2.96963	1.92779	4.47321	4.98284	0.918499	2.63598	Yes
NM_001007259	SETD4	5.00077	4.54483	5.85386	3.86644	8.55314	7.3052	5.76766	3.6039	6.95869	6.71806	7.50843	12.639	3.70603	Yes
NM_001007267	PLA2R1	0.0793201	1.15875	0.193166	2.79341	2.20678	1.71365	0.894002	0.549364	0.380622	2.78051	3.80375	0.64028	1.7531	Yes
NM_001007269	GEMIN7	11.347	7.88047	14.7179	8.67357	8.44599	10.6744	9.56252	15.5782	13.4318	16.6067	8.58715	10.1488	12.4082	Yes
NM_001007270	GEMIN7	11.5142	8.37763	14.9033	9.161	8.81106	11.4181	10.2564	15.9637	13.8192	17.6177	8.92597	10.0908	12.7771	Yes
NM_001007271	DUSP13	0	0.370186	0.135795	0	0.0220376	0.00713108	0.0085266	0	0	0.0239143	0	0.00637765	0	Yes
NM_001007272	DUSP13	0	0.339734	0.188243	0	0.018669	0.0120821	0.0144465	0	0	0.0135059	0	0.0108056	0	Yes
NM_001007273	DUSP13	0	0.38083	0.173396	0	0.0145096	0.00939023	0.0112278	0	0	0.0209936	0	0.00839811	0	Yes
NM_001007277	EI24	52.8075	43.8354	48.2738	63.3107	62.1167	55.6414	62.5441	49.9393	33.851	45.8146	66.859	35.7665	39.3484	Yes
NM_001007278	TRIM13	3.74902	4.50958	1.36879	6.35418	2.92008	2.83577	4.97924	2.60085	4.70272	2.34994	7.61612	2.63508	2.19623	Yes
NM_001007279	RASL10A	0.0104637	0.115036	0.032736	0.0478711	0.11505	1.4537	0.3222	0.26393	0.0116277	0.0396343	0.114449	0.107814	0	Yes
NM_001007464	RWDD1	18.9714	14.6258	14.6104	10.725	13.8651	13.7709	17.9564	25.4479	20.4871	5.85614	17.6587	24.2471	30.5009	Yes
NM_001007466	TULP4	4.91792	3.11407	3.95503	1.58413	3.70767	4.58982	1.55361	1.66576	1.74575	3.73137	1.87193	1.54328	3.71589	Yes
NM_001007467	SFI1	4.48221	8.06071	4.8485	3.83537	3.81984	7.17651	7.09943	4.88891	5.50026	8.01559	6.2335	10.0193	3.10657	Yes
NM_001007468	SMARCB1	85.4711	56.9279	86.3351	53.9541	69.8823	83.2822	68.0526	56.8275	360.526	83.9593	49.6216	94.3759	51.1526	Yes
NM_001007469	HCST	0.110548	0.418623	0.662887	0.261307	2.00655	2.01447	0.567338	0.910502	0.122846	0.418735	0.183205	2.81413	0.218888	Yes
NM_001007470	TRPM3	0	0.0150219	0	0.015628	0	0	0.088577	0.0140674	0	0.144917	0	0	0	Yes
NM_001007471	TRPM3	0	0.059927	0.00581368	0.00340063	0	0.00134331	0.0409577	0.0137747	0	0.0337861	0.0206949	0.00180207	0.0100921	Yes
NM_001007523	F8A2	0	0	0	0	0	0	0	0	0	0	0	0	0	Yes
NM_001007524	F8A3	0	0	0	0	0	0	0	0	0	0	0	0	0	Yes
NM_001007525	NWD1	0.00122126	0.0223774	0.0611322	0.0139681	0.0306927	0.27809	0.0831276	0.00251465	0.164664	0.0814159	0.0558603	0.00296082	0.0663258	Yes
NM_001007527	LMBRD2	1.71668	10.3922	0.92435	2.3627	3.60431	2.35796	2.70522	4.73666	0.289715	2.18272	3.94574	0.529821	1.74711	Yes
NM_001007530	CDRT15	0.328413	0.216632	0.0256862	0.0600992	0.103171	0.0667695	0.345955	0.219772	0.364947	0.0497585	0.424521	0.059715	0.306553	Yes
NM_001007531	NKAPL	0.0114144	0.0209147	0.0535652	0.0156661	0.0119527	0.0670409	0.0369971	0.058757	0	0.0691764	0.0226995	0.0830184	0.0581159	Yes
NM_001007532	STH	0	0	0	0	0	0	0	0	0	0	0	0	0	Yes
NM_001007533	DYSFIP1	0.0700232	0.0940899	0.0547674	0.0747493	0	0.0369091	0.0661981	0.168212	0.0345835	0	0.046418	0.169763	0.0792271	No
NM_001007537	C1QTNF9B	2.03959	1.31057	0.233093	1.8023	0.165792	0.353446	3.46392	10.1347	3.75332	1.17118	1.59281	10.9959	1.01158	Yes
NM_001007538	SHISA2	0	0.00474577	0	0	0.26783	0.475385	0	0.0133326	0	0	0	0	0.0109893	Yes
NM_001007540	CDHR4	0.0375442	0.0770478	0.340629	0	0	0.0220512	0.0121691	0	0	0	0	0.0227554	0	No
NM_001007544	C1orf186	0.0056013	0	0.0613334	0.00256258	0	0	0.0136165	0	0.00829921	0.00848664	0.0222784	0	0	Yes
NM_001007551	CT45A5	0	0	0	0	0	0	0	0	0	0	0	0	0	Yes
NM_001007553	CSDE1	180.376	172.521	61.3453	112.247	168.697	170.413	93.7524	68.047	53.7856	75.1677	116.231	47.755	61.7641	Yes
NM_001007559	SS18	17.5167	19.2148	20.5877	10.8772	34.7293	17.997	13.1027	5.29191	8.73236	18.4228	9.72531	15.2232	10.696	Yes
NM_001007561	IRGQ	1.60053	1.95039	1.65827	0.768032	1.53947	1.5357	1.17406	1.05809	1.72169	2.16596	1.34272	1.25987	1.01146	Yes
NM_001007563	IGFBPL1	2.33568	0	16.2146	0	0	0.00770261	0	0.60555	0	0	1.33923	0.0309996	0.0434017	Yes
NM_001007565	TFG	51.0649	73.6964	66.117	76.6635	84.2411	77.2736	50.2467	84.9633	38.7577	71.2155	75.1759	44.9808	55.3461	Yes
NM_001007593	SMPD1	8.67528	30.9185	1.45228	0.688591	10.8704	4.90704	2.63233	6.15156	0.45106	11.2876	1.78992	9.59469	7.54779	Yes
NM_001007595	C2CD4B	0	0	0.129896	3.66337	0.155279	0.0937932	0.466215	0.00610656	0.15819	0.0359472	4.30543	0	0.32213	Yes
NM_001007792	NTRK1	0.0216996	0.0159042	0.0537446	0	0.0984665	0.0653591	0	0.0037234	0.00803786	0	0.136653	0.0920644	0.0184139	Yes
NM_001007793	BUB3	67.7114	80.7128	72.8978	79.0644	110.731	119.549	79.8302	29.6818	59.3989	101.673	98.7787	50.5973	76.1659	Yes
NM_001007794	CEPT1	17.3984	26.5689	8.13362	21.6415	13.5265	17.2948	16.1957	14.9104	7.46478	7.73689	18.3748	9.06161	10.7189	Yes
NM_001008	RPS4Y1	0	0	0	0	0	0	0	0	0	0	0	0	0	Yes
NM_001008211	OPTN	1.53103	20.525	18.5213	3.52948	16.1084	31.8577	14.3795	4.28066	5.29117	30.6389	13.4772	3.93163	16.1796	Yes
NM_001008212	OPTN	1.55864	20.855	18.8459	3.59075	16.3298	32.3618	14.608	4.35707	5.38984	31.0641	13.691	3.99971	16.432	Yes
NM_001008213	OPTN	1.53742	20.6105	18.5985	3.54419	16.1728	31.9905	14.4352	4.2985	5.31323	30.7627	13.5334	3.94803	16.2426	Yes
NM_001008215	C2orf64	17.4134	7.87157	6.89872	10.2092	7.27061	16.1886	14.3247	21.9998	10.5616	14.3494	13.1978	13.4419	14.3683	No
NM_001008216	GALE	19.289	46.3377	63.728	81.8803	19.4099	23.2178	118.217	77.8342	40.4527	53.3636	50.8867	21.1962	41.3534	Yes
NM_001008218	AMY1B	0.0278414	0.0667821	0.0673066	0.524548	0.0318049	0.0388796	0.102547	0.0130289	0.0150005	0.00383482	0.125836	0.0797707	0.0386601	No
NM_001008219	AMY1C	0.0300153	0.0696634	0.0665152	0.51838	0.0314309	0.0395525	0.101342	0.0128757	0.0148241	0.0113692	0.12933	0.0788327	0.0382056	No
NM_001008220	CPLX2	1.65996	0.120197	0.0750829	0.657865	0.00418855	0.00632503	0.35167	0.0823602	0.00296324	263.036	1.09773	0.0266676	0.319058	Yes
NM_001008221	AMY1A	0.0261154	0.0689063	0.0633197	0.540038	0.0218777	0.0353968	0.105809	0.0134433	0.00773883	0.0118704	0.129838	0.082308	0.0354576	No
NM_001008222	ZDHHC9	0	0	0	0	0	0	0	0	0	0	0	0	0	Yes
NM_001008223	C1QL4	4.05273	0.308651	2.53228	0.0145014	2.9304	9.45992	0.0220157	0.0279714	0.0402554	0.0960505	0.0180103	8.0634	0.253607	Yes
NM_001008224	UACA	2.15041	12.0415	11.0948	4.37074	11.6554	11.0874	8.1827	4.55542	3.54074	7.35128	3.60001	6.89956	11.4075	Yes
NM_001008225	CNOT4	3.10838	4.31175	4.08676	3.70057	8.4469	4.56725	3.59884	0.863053	4.01567	6.1408	4.66693	2.24219	3.40783	Yes
NM_001008226	FAM154B	0.212111	0.0306544	0.532746	0.0369026	0.0782094	0.0391424	0.0314706	0.0461354	0.030985	0.0362111	0.0475292	0.41284	0.0202809	Yes
NM_001008228	MOG	0.0445916	0.0980468	0.0069753	0	0	0	0	0	0	0	0	0	0	Yes
NM_001008229	MOG	0.0315853	0.0733072	0	0	0	0	0	0	0	0	0	0	0	Yes
NM_001008237	TTC32	10.9767	1.58565	1.15776	10.2051	3.32669	5.6949	6.59714	15.6265	1.38342	5.05485	6.06868	7.99178	3.94227	Yes
NM_001008239	C18orf25	4.65687	6.47587	5.36095	4.10223	7.52056	4.24233	3.15371	1.61879	7.8155	3.61102	7.47573	2.85685	2.09757	Yes
NM_001008269	TMEM89	0.0970931	0.128091	0	0.0444198	0.0406689	0	0.0786764	0.919632	0.402804	0.264794	0.424792	0.0470782	0.065913	Yes
NM_001008270	PRSS37	0	0.0285358	0.0121807	0.0213747	0	0.0175904	0.0252393	0	0.0115374	0	0	0	0	Yes
NM_001008271	SCXA	0.277099	0.665692	0.313051	1.29589	0.112843	1.03632	1.09774	1.40263	3.36435	1.35281	1.56134	2.10868	1.4239	No
NM_001008272	TAGLN3	0	0.010394	0.049913	0.00973197	0.178204	0.0448502	0	0.0146002	0.0945544	0.182636	0.860175	0.0343813	0.577637	Yes
NM_001008273	TAGLN3	0	0.0113954	0.0608022	0.0106696	0.203513	0.0421468	0	0.0160069	0.103664	0.164897	0.973969	0.0376938	0.63329	Yes
NM_001008274	TRIM72	0.390171	0.0413062	4.8623	0.0337171	0.0272382	0.0313385	0.133491	0.00892649	0	0	2.43124	0.0735719	0.0220728	Yes
NM_001008387	REG3G	0	0	0.0154443	0	0	0.0624496	0	0.0203294	0	0	0	0	0	Yes
NM_001008388	CISD2	7.86068	10.0025	13.1731	6.64396	8.93483	10.2174	6.91656	6.66389	6.23871	5.42561	5.2108	5.81922	6.43864	Yes
NM_001008389	UMOD	0	0	0	0.00378442	0	0	0	0	0	0	0	0	0	Yes
NM_001008390	CGGBP1	13.8202	18.4494	11.0381	16.0094	16.047	13.2317	12.9167	4.76611	8.19014	19.1819	19.3061	7.9793	12.5947	Yes
NM_001008391	CCDC73	7.61918	6.35992	5.26944	4.109	5.02333	4.67226	7.02587	11.9753	6.98557	5.46079	7.00145	10.0968	12.0644	Yes
NM_001008392	CTDSPL	12.0798	29.7195	15.6811	25.7356	8.85688	7.71272	18.0799	6.43202	24.4873	53.4201	13.1959	23.1239	21.7792	Yes
NM_001008393	C4orf46	10.0312	6.96504	4.06607	2.93322	12.1855	4.46613	3.50298	3.40967	3.08855	3.19247	2.51207	5.18235	3.37337	Yes
NM_001008394	EID3	0.120648	0.307165	0.0993294	0.00581013	0.186183	0.097542	0.00514546	0.111136	0.023521	0.0384835	0.0252559	0.192433	0.0646609	Yes
NM_001008395	C7orf59	95.5426	37.5741	48.0472	67.5468	81.3691	172.973	150.026	177.94	288.2	96.5286	128.09	155.987	131.954	No
NM_001008396	WDHD1	9.25306	14.3216	7.16469	6.01529	18.8629	3.1439	4.87442	3.12157	6.49567	5.0861	6.11715	5.68434	6.142	Yes
NM_001008397	GPX8	6.88578	15.1494	5.2471	0.0079868	24.9169	12.4868	0.228361	0.272164	1.86237	0.589465	0.0843143	18.3928	0.634893	Yes
NM_001008401	ZNF761	2.52685	9.27784	0.012146	8.80366	3.19195	6.89086	0.940186	2.97375	1.87032	5.92927	5.3957	0.648103	6.19738	Yes
NM_001008404	C14orf180	0	0	0	0	0	0	0	0	0	0	0.0201011	0	0	Yes
NM_001008405	BCAP29	5.5048	8.3896	7.08631	2.78064	15.9759	2.03866	8.88455	7.5759	6.66172	6.37061	6.29792	8.37053	9.22436	Yes
NM_001008409	TTLL9	0.011541	0	0.117346	0.0607198	0.175237	0.0156427	0.0794913	0	0.00427496	0.314749	0.0688543	0.0279799	0	Yes
NM_001008410	STEAP3	18.5842	13.3747	9.29906	9.60426	14.9599	16.0024	20.2492	15.9666	8.6648	9.3748	10.5032	12.4998	10.8579	Yes
NM_001008485	SLC41A3	11.4466	35.5115	26.3331	28.3084	8.03245	25.8111	28.8434	16.826	7.65341	33.3555	32.8101	10.5757	18.6114	Yes
NM_001008486	SLC41A3	11.4098	34.9204	25.9423	27.7794	7.79262	25.1042	28.7121	17.5465	7.81753	32.6342	32.2651	11.0061	18.4595	Yes
NM_001008487	SLC41A3	10.0418	29.9064	23.0351	23.6792	6.23009	22.1405	25.6032	22.9313	7.88673	29.321	28.0757	14.1599	16.9519	Yes
NM_001008489	PHOSPHO2	2.26605	1.50439	2.12554	2.35889	3.07792	2.14404	1.94933	1.44542	1.0401	3.01039	3.52679	1.35354	3.03766	Yes
NM_001008491	SEPT2	81.7308	118.648	126.711	72.6481	128.453	96.6189	87.9119	54.7445	65.3793	87.1337	96.0845	28.6758	27.0441	Yes
NM_001008492	SEPT2	85.6606	125.233	133.532	75.6159	131.709	101.145	93.0336	57.9668	69.1629	91.6949	101.02	30.3089	28.6471	Yes
NM_001008493	ENAH	10.8127	9.73417	3.90094	4.34734	5.88578	9.03115	4.7455	2.08478	4.0099	0.543072	8.00328	3.3813	3.79569	Yes
NM_001008494	ISX	0.0110538	1.72766	0.00432275	0.0935557	0	0.0249704	2.10267	3.61889	4.06376	0	2.15428	0.0100495	0.39865	Yes
NM_001008495	TMEM64	3.54243	4.82135	10.4146	3.84871	10.7951	7.54805	1.49738	1.5907	6.1244	6.75826	1.75251	3.90352	4.36822	Yes
NM_001008496	PIWIL3	0	0.00777558	0	0	0	0	0	0.00273056	0	0	0	0	0	Yes
NM_001008503	OPRM1	0	0	0	0	0	0	0	0	0.0087772	0	0	0	0	Yes
NM_001008504	OPRM1	0	0	0	0	0	0	0	0	0	0	0	0	0	Yes
NM_001008505	OPRM1	0	0	0	0	0	0	0	0	0	0	0	0	0	Yes
NM_001008528	MXRA7	2.38846	0.486875	7.72339	0.12293	2.73558	6.7427	0.117939	0.126791	1.49573	2.78195	0.296868	4.25695	0.513033	Yes
NM_001008529	MXRA7	26.572	1.95288	23.7985	0.602826	24.9282	56.1949	0.756471	0.860996	10.8386	32.0605	2.33033	15.6838	3.25127	Yes
NM_001008530	LGMN	25.0919	24.5394	62.5057	27.6399	21.688	28.9272	10.6805	19.7959	162.879	16.2986	21.3589	49.5798	36.347	Yes
NM_001008534	AKAP14	0	0	0	0	0	0	0	0	0	0	0	0	0	Yes
NM_001008535	AKAP14	0	0	0	0	0	0	0	0	0	0	0	0	0	Yes
NM_001008536	TCHHL1	0	0	0	0	0	0	0	0	0	0	0	0	0	Yes
NM_001008537	KIAA2022	0	0	0	0	0	0	0	0	0	0	0	0	0	Yes
NM_001008539	SLC7A2	15.0524	10.3366	4.44467	0.00112939	2.57212	3.56066	0	2.01669	0.00548648	0.0224415	1.97109	0.508715	0.100551	Yes
NM_001008540	CXCR4	4.93659	0.0144726	0.111971	2.35559	0.0310165	12.3762	10.2846	16.3296	5.44918	1.08453	0.176712	0.143618	0.0167564	Yes
NM_001008541	MXI1	25.1199	6.50262	13.0629	18.2549	9.08827	25.335	2.78078	1.13979	2.30376	9.16293	11.7463	4.35692	4.00249	Yes
NM_001008563	USP20	9.32784	4.87237	7.19238	12.0223	4.99311	10.7291	8.82116	5.18954	2.2882	8.59191	11.3578	3.82925	5.22035	Yes
NM_001008564	NUPL1	21.0779	36.3259	11.9227	38.5674	35.0494	20.5937	19.0946	8.74714	10.5376	12.5014	26.8374	6.13843	7.19871	Yes
NM_001008566	TPST2	9.01967	7.5566	9.68911	3.82594	5.19576	11.6653	5.14184	6.31218	5.91581	7.01647	4.88272	2.57526	3.62928	Yes
NM_001008657	TCOF1	45.3684	40.0869	30.3747	33.7213	46.4547	14.103	30.4588	4.13262	20.8341	43.1356	31.552	19.4137	25.85	Yes
NM_001008660	PICALM	31.3882	42.2505	44.4447	46.6317	60.0599	51.9658	30.7239	18.7768	16.1993	60.3462	53.0155	10.5408	36.8438	Yes
NM_001008661	CCBL2	8.14119	25.1692	17.6661	15.3727	8.28985	25.1811	22.7847	13.1418	15.968	6.75668	21.8792	19.2869	12.4161	Yes
NM_001008662	CCBL2	8.11331	25.6627	18.1189	15.6518	8.30136	25.9171	23.5686	13.7193	16.5778	6.90173	22.4535	20.1148	12.7926	Yes
NM_001008693	CST9	0.00553505	0	0	0.0101291	0	0	0	0.011397	0	0.20127	0	0	0	Yes
NM_001008695	THAP7	26.6836	15.4846	23.7492	10.4637	16.0948	13.8922	15.5646	39.8917	24.227	26.7499	8.34404	39.2082	14.1529	Yes
NM_001008697	TFIP11	15.0195	21.4987	19.1997	6.78989	20.4519	15.3496	14.4753	12.3089	35.2568	26.0293	8.16798	13.0196	12.5536	Yes
NM_001008699	IL4R	0.101005	11.9742	5.43777	11.6871	12.7275	4.3162	10.1694	0.719245	4.16538	12.23	6.67881	1.09173	9.57101	Yes
NM_001008701	LPHN1	11.8016	5.50298	12.8075	9.89749	8.32375	16.5919	1.93339	4.1731	4.9482	3.687	7.56496	15.885	10.4751	Yes
NM_001008703	C6orf1	10.57	11.1019	13.6259	8.64004	15.1873	21.0819	17.8894	36.8666	17.3097	23.7043	9.76293	39.74	17.0611	Yes
NM_001008704	C6orf1	10.8798	11.24	13.8187	8.76895	15.4704	21.3741	18.1975	37.9979	17.8016	24.0086	9.79337	40.7643	17.3693	Yes
NM_001008707	EML1	9.7265	0.0664408	1.43576	0	0.209271	0.00465412	0	0.0721173	0	0.0780386	0.127013	0	0.017483	Yes
NM_001008708	CHAC2	23.5825	14.3266	15.5806	5.90376	7.67684	4.34785	6.18978	8.46745	9.03372	5.41503	6.7143	8.91332	7.99223	Yes
NM_001008709	PPP1CA	114.536	61.8582	184.605	115.908	185.535	162.381	163.537	117.823	228.133	231.219	150.573	159.668	192.051	Yes
NM_001008710	RBPMS	1.28511	1.04164	1.20566	9.60098	4.51777	8.40455	13.417	3.71824	47.3209	2.20607	5.8919	2.6897	3.93231	Yes
NM_001008711	RBPMS	1.25145	1.01413	1.1736	9.34205	4.39831	8.18935	13.0485	3.6373	46.1028	2.14767	5.72351	2.62028	3.83036	Yes
NM_001008712	RBPMS	2.36464	1.91655	1.98856	16.5015	8.54588	16.5429	21.6004	6.87618	88.3413	4.62061	8.67151	5.4773	8.01517	Yes
NM_001008723	CCDC147	0.0871069	0.105032	0.0857108	0.0218538	0.373688	0.299604	0.0364307	0.0289287	0.0228982	0	0.089408	0.0851534	0.0572261	Yes
NM_001008726	WDR89	4.3489	5.2935	6.28739	3.99551	5.76944	7.73323	4.39718	3.02868	8.85167	4.15585	5.90346	3.33934	5.85927	Yes
NM_001008727	ZNF121	4.40714	7.16877	2.97385	2.81435	4.46795	6.12715	1.44861	0.678367	0.66019	2.27488	2.10518	1.62364	3.05234	Yes
NM_001008737	LOC401052	0.84686	0.552121	0.46596	0.563134	0.701191	1.45703	1.06525	5.04871	1.84931	1.23087	0.812694	2.41122	1.16986	Yes
NM_001008738	FNIP1	4.08588	5.56177	4.51736	4.66534	4.70374	6.61018	2.31344	1.03765	1.08135	4.94294	5.26253	0.942743	3.9937	Yes
NM_001008739	C6orf226	1.59099	3.13849	8.45904	3.68583	1.86099	5.91105	5.97975	8.62549	3.10964	4.51336	3.56789	11.51	4.1077	Yes
NM_001008740	TMCO2	0	0.0738628	0	0	0	0.0341486	0	0	0	0.0190864	0.050104	0	0	Yes
NM_001008743	SULT1C3	0	3.03567	0	4.38424	0	0	0.115165	0.0940622	0.0451236	0.0769044	0	0.0369171	0.0516866	Yes
NM_001008744	TDP1	11.1127	6.37942	5.42633	10.075	12.6253	9.55048	9.49765	4.4261	12.0013	6.18523	10.3111	4.99025	8.85343	Yes
NM_001008747	CTAGE15P	0.369465	7.256	5.84155	3.01526	7.43827	3.13386	5.89755	2.35587	3.53763	4.70097	3.73695	3.04835	3.89709	No
NM_001008749	RAB19	0.00979056	2.96358	1.39367	0.644998	2.8809	1.76934	1.11069	0.28223	0.543985	0.0890032	0.778813	0.201757	0.847423	Yes
NM_001008777	FBXO47	0	0.0118634	0.00316497	0.00370261	0.110174	0	0	0.00416608	0	0	0	0	0	Yes
NM_001008778	SPDYC	0	0.0308662	2.80801	0.997062	0	0.0428106	0.0255942	0.0867145	0.124796	0.0957109	0.502505	0.025525	0.607526	Yes
NM_001008779	SPDYA	0.100311	0.164007	0.0241404	0.0105904	0.0242404	0.0348618	0.0250104	0.222434	0.0171492	0.035073	0.0306902	0.0561212	0.117861	Yes
NM_001008781	FAT3	0.00392608	0.00035969	0	0	0.00102781	0.000443449	0	0.00303151	0.000363569	0.0461007	0.0136635	0	0	Yes
NM_001008783	SLC35D3	0.0475921	0.962145	0.00620388	13.8387	0.00830611	4.9383	1.27264	0.43281	1.06948	0.414619	0.914907	0.0865361	1.84428	Yes
NM_001008784	CD200R1L	0	0	0	0.0295995	0	0	0	0.0222031	0	0	0.0428885	0	0	Yes
NM_001008800	CCT3	593.848	147.608	376.585	278.744	296.823	203.53	351.716	316.513	465.508	202.794	265.725	191.385	274.355	Yes
NM_001008801	ZNF468	1.76108	5.20324	1.31385	6.65541	1.69901	5.67645	2.57138	2.54865	1.5879	5.03962	6.34869	0.00579313	7.37678	Yes
NM_001008844	DSP	15.5036	59.0752	38.0078	28.0135	43.4791	21.8659	45.943	31.9808	32.3075	71.9378	63.0786	27.0007	50.5418	Yes
NM_001008860	NIPA2	14.8587	28.5072	18.6153	40.9206	43.7914	19.6164	29.1747	16.5046	19.8891	24.1672	19.6164	14.0186	20.1133	Yes
NM_001008892	NIPA2	15.3282	28.8509	19.1018	41.8301	44.834	20.0442	30.0924	17.2005	20.7072	25.0345	20.1399	14.6097	20.7617	Yes
NM_001008894	NIPA2	14.9336	28.0673	18.6324	40.7146	43.8189	19.5683	29.4585	17.4086	20.6323	24.5206	19.7018	14.6547	20.4907	Yes
NM_001008895	CUL4A	46.5923	38.4806	21.3195	86.6278	41.8102	42.2473	62.1654	27.8555	34.2055	27.2635	75.1145	9.42358	16.9866	Yes
NM_001008897	TCP1	126.062	124.259	147.363	94.5368	105.95	104.429	83.6007	78.236	85.284	104.2	82.2819	66.6103	147.782	Yes
NM_001008901	GTSF1L	0	0	0	0	0	0	0	0.0250615	0	0	0	0	0	Yes
NM_001008910	STK16	8.89849	10.9218	8.47458	10.1177	10.4213	11.6959	15.593	14.1898	10.075	10.8403	11.5741	9.8825	9.68315	Yes
NM_001008925	RCHY1	9.2248	7.51386	6.23684	5.23921	8.90236	6.10775	7.5639	4.40553	3.5998	3.1219	6.04377	5.04657	4.69249	Yes
NM_001008938	CKAP5	47.3362	58.5821	40.5589	43.4765	75.8179	44.9442	24.7015	16.0327	21.2288	72.5049	52.8938	30.1409	44.59	Yes
NM_001008949	ITPRIPL1	14.9484	0.0199806	4.24665	0.00623602	3.71114	0.00410557	0	0.00935548	0	0	0	0	0.115668	Yes
NM_001009	RPS5	618.259	279.378	620.818	502.286	304.507	513.137	533.518	193.781	727.373	726.22	536.381	602.241	601.887	Yes
NM_001009181	STATH	0	0	0	0	0	0	0	0.033517	0	0	0	0	0	Yes
NM_001009182	SIP1	11.6803	7.62223	9.07464	5.28866	9.20854	5.98351	2.97529	6.17646	7.87739	2.8298	5.20562	5.52284	7.5763	No
NM_001009183	SIP1	11.9696	7.69327	8.95918	5.36812	9.19471	5.94736	3.0129	6.04376	7.89807	2.84923	5.07644	5.39989	7.59666	No
NM_001009184	GRINA	55.5105	59.759	84.723	190.811	90.8045	134.411	50.1841	19.9654	55.2002	117.362	169.221	47.9229	52.7625	Yes
NM_001009185	ACSL6	0.622177	0.399531	0.0647345	1.65433	0.00298863	0	3.11401	0.289422	0.00105717	0.147022	14.1667	0.00518944	0.942106	Yes
NM_001009186	CCT6A	123.776	156.466	122.422	98.5465	213.263	128.695	132.211	120.315	63.1451	140.713	103.774	138.654	136.241	Yes
NM_001009552	PPP2CB	24.0125	29.7128	44.1197	18.5513	51.9409	40.6382	25.9335	9.89935	51.9576	16.1968	16.3258	8.29848	24.8359	Yes
NM_001009554	MFAP3L	0.529889	2.81626	2.64993	0.00440769	3.67734	1.55322	0.0104092	0.0843101	0.00713741	1.09722	0.0127731	1.30412	0.806651	Yes
NM_001009555	SH3D19	9.78586	15.63	13.9677	25.0607	18.6119	12.2149	21.057	10.7883	16.3775	23.1736	18.8984	11.228	20.5179	Yes
NM_001009562	LST-3TM12	0.00966919	4.18475	0.801634	0	0.597388	0.639989	0.27423	0.328505	1.10313	0.410199	0	2.99469	5.71073	No
NM_001009565	CDKL4	0.814152	0.00435556	0.00929597	0.0190314	0.018669	0.0107396	0.00963099	0.0244728	0	0.0180078	0	0.0144074	0	Yes
NM_001009566	CLSTN1	32.5284	57.8579	83.2194	41.3202	52.4932	51.9142	31.1483	25.0122	27.9396	19.3382	43.9533	56.6138	38.702	Yes
NM_001009568	SMPDL3B	5.80528	32.7661	29.1451	1.62884	12.2255	15.309	14.7993	6.5846	9.09085	2.18785	10.3706	16.9302	16.778	Yes
NM_001009570	CCT7	449.48	261.531	305.616	254.666	309.758	180.094	212.175	259.85	229.192	259.107	192.248	219.177	243.682	Yes
[truncated: 34,968 more rows]
