# Supplementary material for: Colorectal Cancer Cell Lines Are Representative Models of the Main Molecular Subtypes of Primary Cancer
Source: Oxford University Press journal article supplement (doi:10.1158/0008-5472.can-14-0013), 2014-04-23
Supplement: 00085472can140013-sup-124637_1_supp_2385075_n2k5fv.xlsx [file 00085472can140013-sup-124637_1_supp_2385075_n2k5fv.xlsx]

## Sheet: Top5% NonHyp Cell Lines
Gene Name	Gene Length Sequenced (bp)	Number of Mutated Samples	Number of Mutations	Mutations per Gene Length	Proportion of Mutated Samples (%)	Proportion of Nonsense & Frameshift Mutations (%)	Proportion of Mutations in Nucleotide Repeats (%)
					(n=41)
APC	8697	35	46	0.129004	85.3659	89.1	13.0435
TP53	1182	27	29	0.598407	65.8537	44.8	0
KRAS	687	25	25	0.887563	60.9756	0	0
OBSCN	25109	13	14	0.0135992	31.7073	14.3	7.14286
SMAD4	1659	12	12	0.176421	29.2683	16.7	0
PLEC	14658	9	10	0.0166395	21.9512	0	10
CHD6	8148	8	8	0.0239472	19.5122	12.5	0
DNAH14	13536	8	11	0.0198207	19.5122	0	0
DYNC2H1	12945	8	8	0.0150732	19.5122	0	0
NCOR2	7357	8	8	0.0265219	19.5122	0	0
SPTBN5	10920	8	11	0.0245689	19.5122	27.3	0
DNAH11	13325	7	8	0.0146433	17.0732	0	0
DST	20148	7	8	0.00968443	17.0732	12.5	0
MAP2	5748	7	8	0.0339461	17.0732	0	0
MICAL3	6626	7	7	0.0257669	17.0732	0	0
MLL3	14736	7	8	0.0132412	17.0732	25	0
PIEZO1	7417	7	9	0.0295958	17.0732	0	11.1111
PIK3CA	3207	7	7	0.0532372	17.0732	0	0
ZDBF2	7065	7	8	0.0276181	17.0732	12.5	12.5
ACACB	7377	6	6	0.0198375	14.6341	0	0
ANK2	11931	6	6	0.0122656	14.6341	16.7	0
BSN	11557	6	6	0.0126626	14.6341	0	0
COL18A1	4398	6	6	0.0332745	14.6341	16.7	16.6667
DCTN1	3837	6	6	0.0381396	14.6341	16.7	0
DNAH1	12798	6	6	0.0114347	14.6341	0	0
HSPG2	12526	6	6	0.011683	14.6341	0	0
MYCBP2	13945	6	7	0.0122432	14.6341	0	14.2857
SACS	13740	6	6	0.0106508	14.6341	50	50
SOX9	1530	6	6	0.095648	14.6341	83.3	50
ZFHX3	11112	6	6	0.0131697	14.6341	0	16.6667
ALS2	5052	5	5	0.0241392	12.1951	40	20
ATM	9055	5	5	0.0134678	12.1951	40	0
CUL9	7554	5	5	0.0161439	12.1951	0	0
DNHD1	13965	5	5	0.00873263	12.1951	20	20
GLI3	4743	5	5	0.0257118	12.1951	0	0
JMJD1C	7401	5	5	0.0164777	12.1951	0	0
MADD	4944	5	5	0.0246665	12.1951	20	0
MLL2	16614	5	6	0.00880832	12.1951	0	0
MPDZ	6126	5	5	0.0199072	12.1951	0	0
MUC6	7320	5	5	0.01666	12.1951	0	0
PCNXL2	6414	5	5	0.0190133	12.1951	0	0
PRG4	3664	5	5	0.0332836	12.1951	0	0
RTTN	6536	5	5	0.0186584	12.1951	0	0
SPTBN2	7173	5	5	0.0170014	12.1951	20	0
TRANK1	8778	5	5	0.0138928	12.1951	40	0
WDR81	5884	5	6	0.0248711	12.1951	0	0
ZNF91	3576	5	5	0.0341027	12.1951	0	0
AGRN	6138	4	4	0.0158946	9.7561	0	25
ASPM	10434	4	4	0.00935029	9.7561	0	25
ATG2A	5817	4	4	0.0167717	9.7561	0	25
ATG2B	6237	4	5	0.0195529	9.7561	0	0
AXIN2	2532	4	4	0.0385312	9.7561	0	0
BCL9L	4500	4	4	0.0216802	9.7561	50	50
C19orf71	630	4	4	0.154859	9.7561	50	0
CRAMP1L	3810	4	4	0.0256066	9.7561	0	0
CRAT	1881	4	4	0.0518665	9.7561	0	0
DLG5	5760	4	4	0.0169377	9.7561	0	0
DOPEY2	6897	4	4	0.0141454	9.7561	0	0
EIF5B	3663	4	4	0.0266342	9.7561	0	0
EPHB4	2964	4	4	0.0329153	9.7561	0	0
EPPK1	7263	4	5	0.0167908	9.7561	0	0
ERBB3	4029	4	4	0.0242147	9.7561	0	0
FANCA	3766	4	4	0.0259057	9.7561	0	0
FRAS1	11890	4	5	0.0102566	9.7561	0	0
GIGYF1	2937	4	5	0.0415224	9.7561	0	0
GRAMD1B	2127	4	4	0.0458679	9.7561	0	0
HECTD1	7833	4	4	0.0124551	9.7561	0	0
HIP1R	3207	4	4	0.0304213	9.7561	25	25
HTT	9298	4	4	0.0104927	9.7561	25	0
JAK1	3465	4	4	0.0281561	9.7561	0	0
KAT6B	5946	4	4	0.0164078	9.7561	0	0
KIAA0947	6801	4	5	0.0179314	9.7561	0	20
KIAA1549L	5550	4	4	0.0175786	9.7561	0	0
KIF18B	2569	4	4	0.0379762	9.7561	0	25
KIF26A	5649	4	4	0.0172705	9.7561	0	0
KIF26B	6327	4	4	0.0154198	9.7561	0	0
LYST	11406	4	5	0.0106918	9.7561	20	0
MED1	4746	4	5	0.0256956	9.7561	40	20
MEGF6	4626	4	4	0.0210897	9.7561	50	25
MICALCL	1959	4	4	0.0498014	9.7561	0	0
MYO7B	6183	4	4	0.0157789	9.7561	0	0
NOTCH3	6848	4	4	0.0142466	9.7561	0	25
PHLDB1	3993	4	4	0.024433	9.7561	25	0
PIK3C2B	4905	4	4	0.0198901	9.7561	0	0
PLCE1	7191	4	4	0.0135671	9.7561	0	0
PLK1	1812	4	4	0.0538416	9.7561	0	0
POLRMT	3693	4	4	0.0264178	9.7561	0	0
PRKDC	12386	4	4	0.00787671	9.7561	25	0
PTPN13	7458	4	4	0.0130814	9.7561	25	0
RAPGEF1	3296	4	4	0.0295998	9.7561	0	0
RASA2	2550	4	4	0.0382592	9.7561	25	25
RBM23	1200	4	4	0.0813008	9.7561	25	0
RECQL4	3628	4	4	0.0268911	9.7561	0	0
RGS12	4415	4	4	0.0220976	9.7561	25	0
ROBO1	5011	4	4	0.0194694	9.7561	25	0
SCN5A	6140	4	4	0.0158894	9.7561	0	0
SEC16A	7074	4	4	0.0137915	9.7561	0	0
SEC31A	3727	4	4	0.0261768	9.7561	0	0
SI	5484	4	4	0.0177901	9.7561	25	0
SRRM2	7728	4	4	0.0126243	9.7561	0	0
SYNE2	20769	4	6	0.00704615	9.7561	0	0
SZT2	493	4	4	0.197892	9.7561	0	0
TENM3	8100	4	5	0.0150557	9.7561	0	0
TPR	6904	4	5	0.0176638	9.7561	0	20
TRPA1	3360	4	4	0.029036	9.7561	50	25
TRPM2	4330	4	4	0.0225314	9.7561	0	25
TTC28	6968	4	4	0.0140013	9.7561	0	0
UBR4	15552	4	4	0.00627321	9.7561	0	0
UGGT2	4551	4	5	0.0267966	9.7561	0	0
URB1	6730	4	4	0.0144964	9.7561	0	0
WDR67	3201	4	4	0.0304783	9.7561	25	0
WDR7	4473	4	4	0.0218111	9.7561	0	0
ZMYND8	3492	4	4	0.0279384	9.7561	0	25
ZNF43	2430	4	4	0.0401485	9.7561	50	25
ZNF518B	3225	4	4	0.0302515	9.7561	0	0
ZNF606	2379	4	4	0.0410092	9.7561	0	0
AATK	4125	3	3	0.0177384	7.31707	0	0
ABCA1	6786	3	3	0.0107826	7.31707	0	0
ABCA3	5115	3	3	0.0143051	7.31707	0	0
ABCC1	4548	3	3	0.0160886	7.31707	0	0
ACIN1	4165	3	3	0.017568	7.31707	0	0
ACSL6	2198	3	3	0.0332897	7.31707	0	0
ADCY1	3360	3	3	0.021777	7.31707	33.3	33.3333
AHNAK	17781	3	3	0.00411511	7.31707	0	0
AKAP13	8508	3	4	0.011467	7.31707	0	0
AKT3	1453	3	3	0.0503584	7.31707	0	0
ALMS1	12504	3	3	0.00585179	7.31707	0	0
ANK3	13459	3	3	0.00543657	7.31707	0	33.3333
ANXA3	972	3	3	0.0752785	7.31707	0	0
ARHGAP31	4335	3	3	0.0168791	7.31707	0	0
ARMC5	3122	3	3	0.0234371	7.31707	0	0
ARVCF	2889	3	3	0.0253274	7.31707	0	33.3333
ASB6	1266	3	3	0.0577968	7.31707	0	0
ASH1L	8808	3	3	0.0083073	7.31707	0	0
ATP8A1	3569	3	3	0.0205017	7.31707	0	0
ATR	7935	3	3	0.00922126	7.31707	0	0
ATXN7L2	2154	3	3	0.0339697	7.31707	0	0
AUTS2	3446	3	3	0.0212335	7.31707	33.3	0
BAHD1	2343	3	3	0.0312295	7.31707	0	0
BCAN	2736	3	3	0.0267437	7.31707	0	0
BEGAIN	1782	3	3	0.041061	7.31707	0	0
BOD1L1	8759	3	3	0.00835378	7.31707	33.3	0
BRAF	2301	3	4	0.0423994	7.31707	0	0
BRWD1	7216	3	3	0.0101401	7.31707	0	0
C1R	1039	3	3	0.0704242	7.31707	0	33.3333
C4orf21	6315	3	3	0.0115868	7.31707	33.3	0
CACTIN	2277	3	3	0.0321347	7.31707	33.3	0
CASC5	6807	3	3	0.0107493	7.31707	33.3	33.3333
CAST	2277	3	3	0.0321347	7.31707	0	0
CCDC132	2937	3	3	0.0249134	7.31707	0	0
CCDC57	2748	3	3	0.0266269	7.31707	0	0
CCDC64B	1527	3	3	0.047918	7.31707	0	0
CCT7	1632	3	3	0.044835	7.31707	0	0
CDCA7	1353	3	3	0.0540804	7.31707	0	0
CELSR2	8577	3	3	0.00853104	7.31707	0	0
CELSR3	9939	3	4	0.00981598	7.31707	0	0
CENPF	9345	3	3	0.00782993	7.31707	0	33.3333
CEP152	4965	3	3	0.0147373	7.31707	0	0
CEP350	9354	3	3	0.0078224	7.31707	0	0
CFTR	4443	3	3	0.0164688	7.31707	0	0
CHPF2	2202	3	3	0.0332292	7.31707	0	0
CIT	6084	3	3	0.0120267	7.31707	33.3	0
CLOCK	2136	3	3	0.034256	7.31707	33.3	33.3333
COL27A1	5520	3	3	0.0132556	7.31707	0	0
COL28A1	3378	3	3	0.021661	7.31707	0	33.3333
COL4A2	5139	3	3	0.0142383	7.31707	33.3	0
COL6A1	3087	3	3	0.0237029	7.31707	0	0
COL7A1	8835	3	3	0.00828192	7.31707	0	0
CPSF1	4254	3	3	0.0172005	7.31707	0	0
CREBBP	7082	3	3	0.0103319	7.31707	0	0
CTHRC1	732	3	3	0.09996	7.31707	0	0
CTNNB1	2346	3	3	0.0311896	7.31707	0	0
CTNND1	2835	3	3	0.0258098	7.31707	66.7	0
CTTNBP2	4992	3	3	0.0146576	7.31707	0	0
DENND4B	4491	3	3	0.0162927	7.31707	0	0
DENND6B	1758	3	3	0.0416216	7.31707	0	0
DMXL1	8941	3	3	0.00818373	7.31707	33.3	0
DOCK1	5354	3	3	0.0136666	7.31707	0	0
DOCK4	5901	3	3	0.0123997	7.31707	0	0
DUSP27	3477	3	3	0.0210442	7.31707	0	0
EHD4	1626	3	3	0.0450005	7.31707	0	0
EIF4G1	4801	3	3	0.0152407	7.31707	0	0
EML5	5925	3	3	0.0123495	7.31707	33.3	0
EPG5	7740	3	3	0.00945358	7.31707	0	0
EPHB1	2955	3	4	0.0330156	7.31707	0	0
EPS15	2691	3	3	0.0271909	7.31707	0	0
ERCC4	2751	3	3	0.0265979	7.31707	0	0
ETV6	1359	3	3	0.0538416	7.31707	33.3	0
EXD3	2631	3	4	0.0370813	7.31707	0	0
EXOC6B	2436	3	3	0.0300372	7.31707	33.3	33.3333
FAM129B	2202	3	3	0.0332292	7.31707	0	33.3333
FAM160B2	2187	3	3	0.0334571	7.31707	0	0
FAM83H	3540	3	3	0.0206697	7.31707	0	0
FANCM	6147	3	3	0.0119035	7.31707	33.3	33.3333
FAT1	13767	3	3	0.00531494	7.31707	0	0
FBRSL1	2313	3	3	0.0316346	7.31707	33.3	0
FBXO42	2154	3	3	0.0339697	7.31707	0	0
FBXW7	2533	3	3	0.028887	7.31707	33.3	0
FGF18	624	3	3	0.117261	7.31707	0	33.3333
FGFR4	2483	3	3	0.0294687	7.31707	0	0
FICD	1377	3	3	0.0531378	7.31707	33.3	0
FN1	7300	3	3	0.0100234	7.31707	0	0
FOCAD	5331	3	4	0.0183007	7.31707	0	25
FREM1	6446	3	3	0.0113513	7.31707	0	0
FRYL	9042	3	3	0.00809232	7.31707	33.3	33.3333
FYCO1	4437	3	3	0.016491	7.31707	0	0
GALNT9	1078	3	3	0.0678764	7.31707	0	0
GMEB2	1593	3	3	0.0459327	7.31707	0	0
GPR125	3966	3	3	0.0184495	7.31707	0	0
GRIN3B	3132	3	3	0.0233623	7.31707	0	0
GTF3C1	6330	3	3	0.0115594	7.31707	0	0
HIPK3	3648	3	3	0.0200578	7.31707	0	0
IARS	3789	3	3	0.0193114	7.31707	0	0
IFT172	5250	3	3	0.0139373	7.31707	0	0
IGF2R	7327	3	3	0.00998645	7.31707	0	0
IGSF9	3303	3	3	0.0221528	7.31707	0	0
INADL	5406	3	3	0.0135351	7.31707	33.3	0
IQCE	1983	3	4	0.0491987	7.31707	0	0
ITPR1	8130	3	3	0.00900009	7.31707	33.3	0
KIAA0368	6054	3	3	0.0120863	7.31707	0	0
KIAA1009	4212	3	3	0.017372	7.31707	33.3	0
KIAA1324L	3090	3	3	0.0236798	7.31707	0	33.3333
KIAA1429	5220	3	3	0.0140174	7.31707	0	0
KIAA1432	4330	3	3	0.0168986	7.31707	0	0
KIF7	4032	3	3	0.0181475	7.31707	0	0
KNDC1	5250	3	3	0.0139373	7.31707	0	0
KRBA1	2897	3	3	0.0252574	7.31707	0	0
KRT4	1563	3	3	0.0468143	7.31707	33.3	0
LAMA5	11088	3	3	0.00659909	7.31707	0	0
LIMK2	2322	3	3	0.0315119	7.31707	0	0
LOXL4	2271	3	3	0.0322196	7.31707	0	0
LPHN2	4212	3	3	0.017372	7.31707	0	0
LRBA	8592	3	3	0.00851615	7.31707	33.3	33.3333
LRP1	13635	3	3	0.00536639	7.31707	33.3	33.3333
LRRC41	2439	3	3	0.0300003	7.31707	0	0
LTN1	5439	3	3	0.013453	7.31707	33.3	33.3333
MAP2K7	1118	3	3	0.0654479	7.31707	0	0
MIOS	2628	3	3	0.0278427	7.31707	0	0
MKLN1	2237	3	3	0.0327093	7.31707	0	0
MLL5	5577	3	3	0.0131201	7.31707	0	33.3333
MLLT4	4932	3	3	0.0148359	7.31707	0	0
MPP2	1659	3	3	0.0441053	7.31707	0	0
MRC2	4440	3	3	0.0164799	7.31707	0	0
MTMR14	1953	3	3	0.0374658	7.31707	0	0
MUC12	16008	3	3	0.00457089	7.31707	0	0
MYOF	6186	3	3	0.0118284	7.31707	0	0
NBEAL1	8085	3	3	0.00905018	7.31707	33.3	0
NES	4866	3	3	0.0150371	7.31707	0	0
NFXL1	2736	3	3	0.0267437	7.31707	33.3	0
NIPBL	8185	3	3	0.00893961	7.31707	66.7	0
NISCH	4172	3	3	0.0175385	7.31707	0	33.3333
NLRP6	2678	3	3	0.0273229	7.31707	0	0
NOTCH2	7417	3	3	0.00986527	7.31707	0	0
NPHP4	4281	3	3	0.017092	7.31707	0	0
NUP205	6039	3	3	0.0121164	7.31707	0	0
NUP210	5664	3	3	0.0129186	7.31707	0	0
OBSL1	5692	3	3	0.012855	7.31707	0	0
PAK4	1776	3	3	0.0411997	7.31707	0	0
PALLD	4048	3	3	0.0180758	7.31707	0	0
PCDHGA4	2463	3	4	0.0396106	7.31707	0	0
PCDHGA5	2440	3	3	0.029988	7.31707	0	0
PCDHGA7	2454	3	3	0.0298169	7.31707	0	0
PCDHGB1	2431	3	3	0.030099	7.31707	0	0
PCDHGB7	2427	3	3	0.0301486	7.31707	0	0
PCF11	4668	3	3	0.015675	7.31707	33.3	33.3333
PCSK6	2947	3	4	0.0331052	7.31707	0	0
PDE3B	3339	3	3	0.021914	7.31707	0	0
PELP1	3393	3	3	0.0215652	7.31707	0	0
PITRM1	3122	3	3	0.0234371	7.31707	0	0
PKLR	1732	3	3	0.0422464	7.31707	0	0
PLB1	4326	3	3	0.0169142	7.31707	33.3	0
PLCD1	2368	3	3	0.0308998	7.31707	0	0
PLEKHA7	3280	3	3	0.0223081	7.31707	0	0
PLEKHH1	4095	3	3	0.0178683	7.31707	0	0
PLEKHM2	3000	3	3	0.0243902	7.31707	33.3	0
POLH	2142	3	3	0.03416	7.31707	0	33.3333
POLN	2570	3	3	0.0284711	7.31707	66.7	0
PPP1R18	1842	3	3	0.0397235	7.31707	0	0
PRDM2	5219	3	7	0.0327135	7.31707	85.7	0
PROM1	2598	3	3	0.0281643	7.31707	33.3	33.3333
PTCHD4	2541	3	3	0.028796	7.31707	0	0
PTPN12	2343	3	3	0.0312295	7.31707	33.3	33.3333
PTPN14	3564	3	4	0.027374	7.31707	0	0
PTPRS	5847	3	3	0.0125142	7.31707	0	0
PTPRU	4286	3	3	0.017072	7.31707	0	0
PWP1	1506	3	3	0.0485861	7.31707	0	0
RALGAPA1	6260	3	3	0.0116886	7.31707	0	33.3333
RECQL5	3059	3	3	0.0239198	7.31707	0	0
RERE	4701	3	3	0.0155649	7.31707	0	0
RGS3	4177	3	3	0.0175175	7.31707	0	0
RIPK4	2355	3	3	0.0310704	7.31707	0	0
RLTPR	4066	3	3	0.0179958	7.31707	0	0
ROBO3	4161	3	3	0.0175849	7.31707	0	0
RPTOR	4008	3	3	0.0182562	7.31707	0	0
RSBN1L	2424	3	3	0.0301859	7.31707	0	0
SART3	2892	3	3	0.0253011	7.31707	33.3	0
SCAF1	3939	3	3	0.018576	7.31707	0	0
SCAP	3840	3	3	0.0190549	7.31707	0	0
SDK1	6417	3	3	0.0114026	7.31707	0	0
SEMA4G	2200	3	3	0.0332594	7.31707	0	0
SETD1A	5124	3	3	0.01428	7.31707	0	0
SF3A1	2168	3	3	0.0337503	7.31707	0	0
SH3PXD2B	2736	3	3	0.0267437	7.31707	0	0
SHANK1	6486	3	3	0.0112813	7.31707	33.3	0
SLC26A9	2668	3	3	0.0274253	7.31707	0	0
SLC7A9	1464	3	3	0.04998	7.31707	0	0
SMC4	3867	3	3	0.0189218	7.31707	33.3	33.3333
SNAPC4	4410	3	3	0.016592	7.31707	0	33.3333
SNPH	1485	3	3	0.0492732	7.31707	0	0
SNX13	2874	3	3	0.0254595	7.31707	33.3	0
SON	7536	3	3	0.00970949	7.31707	0	0
SPECC1	3269	3	3	0.0223832	7.31707	0	0
SPEN	10851	3	3	0.00674322	7.31707	0	33.3333
SPG11	7332	3	3	0.00997964	7.31707	0	0
ST6GALNAC1	1803	3	3	0.0405828	7.31707	33.3	0
STAB1	7713	3	3	0.00948668	7.31707	0	0
STEAP4	1380	3	3	0.0530223	7.31707	0	0
STK11IP	3300	3	3	0.0221729	7.31707	66.7	0
STT3B	2165	3	3	0.0337971	7.31707	0	0
SYNCRIP	1914	3	3	0.0382292	7.31707	0	33.3333
TACC2	8915	3	3	0.0082076	7.31707	0	0
TANC1	5570	3	3	0.0131366	7.31707	33.3	0
TANC2	5973	3	3	0.0122502	7.31707	33.3	0
TBC1D8	3296	3	3	0.0221999	7.31707	0	0
TCF20	5901	3	3	0.0123997	7.31707	0	0
TCF3	2192	3	3	0.0333808	7.31707	33.3	0
THBS1	3513	3	4	0.0277714	7.31707	25	25
THBS3	2871	3	3	0.0254861	7.31707	0	0
TIAM1	4776	3	3	0.0153205	7.31707	0	0
TJP3	2768	3	5	0.0440575	7.31707	0	0
TMEM8B	1617	3	3	0.0452509	7.31707	0	0
TNFRSF10A	1407	3	3	0.0520048	7.31707	0	0
TNRC18	8907	3	3	0.00821497	7.31707	0	0
TRIM24	3153	3	3	0.0232067	7.31707	33.3	0
TRIM66	3518	3	3	0.020799	7.31707	0	0
TSPAN8	714	3	3	0.10248	7.31707	0	0
UAP1	1518	3	3	0.0482021	7.31707	0	0
ULK4	3828	3	3	0.0191146	7.31707	0	0
UNC13B	4776	3	3	0.0153205	7.31707	0	0
USP34	10641	3	3	0.0068763	7.31707	0	0
USP42	3951	3	3	0.0185195	7.31707	0	33.3333
USP53	3222	3	3	0.0227097	7.31707	33.3	0
UTRN	10302	3	3	0.00710258	7.31707	0	0
VSIG10L	2604	3	3	0.0280994	7.31707	0	0
WDR3	2739	3	3	0.0267144	7.31707	0	0
WRN	4299	3	3	0.0170204	7.31707	0	0
WWOX	1303	3	3	0.0561556	7.31707	0	0
ZBTB46	1770	3	3	0.0413394	7.31707	0	0
ZBTB47	2244	3	3	0.0326073	7.31707	0	0
ZCCHC14	2850	3	3	0.0256739	7.31707	0	0
ZFYVE28	2664	3	3	0.0274665	7.31707	33.3	0
ZKSCAN1	1692	3	3	0.0432451	7.31707	0	0
ZMIZ2	2579	3	3	0.0283717	7.31707	0	0
ZNF142	5064	3	3	0.0144492	7.31707	0	0
ZNF292	8172	3	3	0.00895383	7.31707	0	0
ZNF425	2259	3	3	0.0323908	7.31707	33.3	33.3333
ZNF430	1713	3	4	0.0569533	7.31707	50	25
ZNF548	1602	3	3	0.0456746	7.31707	0	0
ZNF571	1830	3	4	0.053312	7.31707	0	0
ZNF638	5937	3	3	0.0123245	7.31707	0	0
ZNF680	1712	3	3	0.0427399	7.31707	0	33.3333
ZNF845	2913	3	3	0.0251187	7.31707	0	0

## Sheet: Top5% NonHyp TCGA Cancers
Gene Name	Gene Length Sequenced (bp)	Number of Mutated Samples	Number of Mutations	Mutations per Gene Length	Proportion of Mutated Samples (%)	Proportion of Nonsense & Frameshift Mutations (%)	Proportion of Mutations in Nucleotide Repeats (%)
					(n=188)
APC	8697	149	200	0.122321	79.2553	94	1.5
TP53	1182	112	113	0.508514	59.5745	30.1	3.53982
KRAS	687	83	83	0.642634	44.1489	0	0
PIK3CA	3207	33	38	0.063027	17.5532	0	0
FBXW7	2533	20	21	0.0440987	10.6383	4.8	0
SMAD4	1659	19	19	0.0609185	10.1064	5.3	5.26316
NRAS	570	17	17	0.158641	9.04255	0	0
TCF7L2	2063	17	17	0.0438321	9.04255	35.3	29.4118
ANK2	11931	13	14	0.00624156	6.91489	14.3	7.14286
SDK1	6417	13	13	0.0107759	6.91489	0	15.3846
ATM	9055	11	12	0.00704912	5.85106	33.3	0
SACS	13740	11	11	0.00425842	5.85106	18.2	0
AHNAK2	17333	10	13	0.00398944	5.31915	0	15.3846
SMAD2	1404	10	10	0.0378857	5.31915	50	0
ARID1A	6858	9	9	0.00698051	4.78723	77.8	0
CTNNB1	2346	9	10	0.0226733	4.78723	0	0
ROBO1	5011	9	9	0.00955345	4.78723	0	0
DNAH11	13325	8	8	0.00319349	4.25532	12.5	0
FN1	7300	8	8	0.0058292	4.25532	0	0
KIAA1804	3111	8	8	0.0136783	4.25532	12.5	0
MUC17	13482	8	8	0.0031563	4.25532	0	0
PCDHA13	2394	8	8	0.0177749	4.25532	0	12.5
PTPRM	4398	8	8	0.00967558	4.25532	12.5	0
SOX9	1530	8	9	0.0312891	4.25532	100	0
TNS1	5208	8	8	0.00817074	4.25532	0	0
UGGT2	4551	8	8	0.00935029	4.25532	12.5	12.5
VPS13B	12178	8	8	0.00349427	4.25532	0	0
ABCA1	6786	7	8	0.00627073	3.7234	0	0
ACVR1B	1518	7	8	0.0280324	3.7234	12.5	0
CADPS	4131	7	7	0.00901332	3.7234	14.3	0
CHD4	5739	7	7	0.0064879	3.7234	14.3	14.2857
CNTNAP2	3996	7	7	0.00931783	3.7234	14.3	14.2857
DLC1	4668	7	7	0.00797644	3.7234	0	0
MAP1B	7407	7	7	0.00502687	3.7234	14.3	0
MDN1	16787	7	7	0.00221803	3.7234	14.3	0
NBEA	8832	7	7	0.00421581	3.7234	14.3	0
SETX	8034	7	7	0.00463456	3.7234	28.6	0
TRPS1	3885	7	7	0.00958405	3.7234	14.3	0
ASTN2	3892	6	6	0.00820013	3.19149	0	0
AXIN2	2532	6	7	0.0147054	3.19149	14.3	57.1429
DMXL1	8941	6	6	0.0035695	3.19149	0	0
DNMT1	4851	6	6	0.00657903	3.19149	0	0
DYNC2H1	12945	6	6	0.00246542	3.19149	33.3	0
ERBB3	4029	6	6	0.00792129	3.19149	0	0
FAM5C	2301	6	6	0.01387	3.19149	16.7	0
MAP2	5748	6	6	0.00555235	3.19149	33.3	0
MRC2	4440	6	6	0.00718804	3.19149	0	0
MTOR	7401	6	6	0.00431224	3.19149	0	0
NRXN3	3532	6	6	0.00903593	3.19149	0	0
PI4KA	6153	6	6	0.00518688	3.19149	16.7	0
PTPRU	4286	6	6	0.00744631	3.19149	0	16.6667
TAF1L	5481	6	6	0.00582282	3.19149	0	0
TNFRSF10C	780	6	6	0.0409165	3.19149	0	0
ADCY1	3360	5	5	0.0079154	2.65957	0	0
ASCC3	6704	5	5	0.00396715	2.65957	0	0
BCL9L	4500	5	5	0.00591017	2.65957	60	0
BRAF	2301	5	5	0.0115583	2.65957	0	0
BSN	11557	5	5	0.00230127	2.65957	0	20
C5	5031	5	5	0.00528637	2.65957	0	20
CARD11	3465	5	5	0.00767554	2.65957	0	0
CBLB	2949	5	5	0.00901856	2.65957	20	0
CNTRL	6978	5	5	0.00381137	2.65957	20	0
DAPK1	4293	5	5	0.00619514	2.65957	0	0
DOCK9	6395	5	5	0.00415883	2.65957	0	0
DYNC1H1	13941	5	5	0.00190774	2.65957	0	0
EIF4A2	1224	5	5	0.0217285	2.65957	0	0
ELF3	1116	5	5	0.0238313	2.65957	80	0
ERBB2	3695	5	6	0.00863732	2.65957	0	0
FCGBP	15070	5	6	0.00211778	2.65957	16.7	0
GNAS	3994	5	5	0.00665892	2.65957	0	20
HECTD4	12009	5	5	0.00221465	2.65957	0	0
HERC2	14505	5	6	0.00220027	2.65957	0	0
KALRN	9109	5	6	0.00350367	2.65957	0	0
LAMA3	10173	5	5	0.00261435	2.65957	0	20
MAP2K4	1085	5	5	0.0245122	2.65957	20	0
MLL3	14736	5	5	0.00180481	2.65957	20	0
NFASC	3858	5	5	0.00689366	2.65957	40	0
NOTCH3	6848	5	5	0.00388372	2.65957	0	0
OGDHL	3033	5	5	0.00876879	2.65957	0	0
PCBP1	1071	5	5	0.0248326	2.65957	0	0
PCDHGA2	2424	5	5	0.0109718	2.65957	0	0
PDE10A	2370	5	5	0.0112218	2.65957	0	0
PRKD1	2739	5	5	0.00971002	2.65957	0	0
RALGAPA1	6260	5	5	0.00424852	2.65957	0	20
REV3L	9393	5	5	0.00283144	2.65957	0	0
RNF213	15065	5	5	0.0017654	2.65957	0	0
SCN5A	6140	5	6	0.00519787	2.65957	0	0
SDK2	6402	5	5	0.00415429	2.65957	0	0
SLC44A5	2267	5	5	0.0117317	2.65957	0	20
STAG1	3777	5	5	0.0070415	2.65957	0	0
TENM3	8100	5	5	0.00328343	2.65957	0	0
TGFBR2	1704	5	5	0.0156078	2.65957	0	20
TNC	6606	5	5	0.004026	2.65957	0	0
TRPA1	3360	5	5	0.0079154	2.65957	0	0
UTRN	10302	5	5	0.00258161	2.65957	0	0
WDFY3	10581	5	5	0.00251354	2.65957	0	0
ZC3H13	4139	5	5	0.00642565	2.65957	80	40
ZCCHC6	4488	5	5	0.00592597	2.65957	20	40
ABL2	3598	4	4	0.00591345	2.12766	0	25
ADAR	3624	4	4	0.00587103	2.12766	25	0
ADNP	3309	4	4	0.00642992	2.12766	25	0
AGPAT4	1137	4	4	0.0187129	2.12766	0	25
ALPK1	3727	4	4	0.00570877	2.12766	0	25
AMOTL1	2871	4	4	0.00741087	2.12766	25	0
APLP1	1956	4	4	0.0108776	2.12766	0	0
ARAP2	5115	4	4	0.00415965	2.12766	50	0
ARHGAP21	5877	4	4	0.00362032	2.12766	0	0
ARID2	5508	4	4	0.00386285	2.12766	25	0
ASH1L	8808	4	4	0.0024156	2.12766	0	0
BACH2	2526	4	4	0.00842304	2.12766	0	0
BRPF3	3618	4	4	0.00588076	2.12766	0	0
C5orf42	9594	4	4	0.0022177	2.12766	0	0
CASZ1	5284	4	4	0.00402661	2.12766	0	0
CCDC88A	5616	4	4	0.00378857	2.12766	25	0
CDON	3796	4	4	0.005605	2.12766	0	0
CENPE	8106	4	4	0.0026248	2.12766	0	0
CHD2	5350	4	4	0.00397693	2.12766	0	0
CHD6	8148	4	4	0.00261127	2.12766	0	0
CHST4	1161	4	4	0.0183261	2.12766	25	0
CIZ1	2305	4	4	0.00923063	2.12766	0	0
COL4A1	5010	4	4	0.00424683	2.12766	25	0
COPB1	2862	4	4	0.00743417	2.12766	0	0
CRTC1	1644	4	4	0.012942	2.12766	75	75
DAB1	1668	4	4	0.0127558	2.12766	0	0
DICER1	5769	4	4	0.00368809	2.12766	50	0
DNAJC13	6732	4	4	0.00316052	2.12766	0	0
DST	20148	4	4	0.00105602	2.12766	25	0
EPG5	7740	4	4	0.00274891	2.12766	25	0
FAM65A	3684	4	4	0.00577541	2.12766	0	0
FAT1	13767	4	4	0.00154548	2.12766	25	0
GALNT14	1659	4	4	0.012825	2.12766	0	0
GTF2IRD1	2744	4	4	0.00775386	2.12766	0	0
GTF3C1	6330	4	4	0.00336123	2.12766	25	25
HDAC9	3251	4	4	0.00654463	2.12766	0	0
HEATR1	6435	4	4	0.00330639	2.12766	0	0
IFT80	2332	4	4	0.00912375	2.12766	0	0
IQGAP2	4728	4	4	0.00450013	2.12766	0	25
ISL1	1050	4	4	0.0202634	2.12766	25	0
ITPR1	8130	4	4	0.00261705	2.12766	0	25
JARID2	3741	4	4	0.00568741	2.12766	0	25
KDM5B	4431	4	4	0.00480176	2.12766	0	0
LRP6	4842	4	4	0.00439418	2.12766	25	25
MACF1	16284	4	4	0.0013066	2.12766	0	0
MAN2A1	3435	4	4	0.00619406	2.12766	0	0
MAPKBP1	4545	4	5	0.00585165	2.12766	40	0
MCM10	2628	4	4	0.00809612	2.12766	0	0
ME1	1641	4	4	0.0129656	2.12766	0	0
ME3	1815	4	4	0.0117226	2.12766	0	0
MPDZ	6126	4	5	0.00434145	2.12766	20	0
MYH11	5370	4	4	0.00396212	2.12766	25	0
MYH14	6111	4	4	0.00348169	2.12766	0	0
MYO5A	5541	4	4	0.00383985	2.12766	25	0
NAV3	7092	4	4	0.00300008	2.12766	0	0
NELL2	2691	4	4	0.00790658	2.12766	25	0
NUP205	6039	4	4	0.0035232	2.12766	0	25
OBSCN	25109	4	4	0.000847369	2.12766	0	25
OSBPL6	2919	4	4	0.007289	2.12766	0	0
PCCA	2133	4	4	0.00997496	2.12766	0	0
PCDHA3	2394	4	4	0.00888747	2.12766	0	0
PCDHGB2	2434	4	4	0.00874141	2.12766	25	0
PCNT	10011	4	4	0.00212532	2.12766	0	0
PHLDB1	3993	4	4	0.00532847	2.12766	0	0
PIK3C2B	4905	4	4	0.00433774	2.12766	0	0
PIK3R1	2297	4	4	0.00926278	2.12766	25	0
PLEKHG1	4158	4	4	0.00511703	2.12766	25	0
PNPLA7	4029	4	4	0.00528086	2.12766	25	25
PRDM2	5219	4	4	0.00407676	2.12766	25	0
PRKCE	2214	4	4	0.00961003	2.12766	25	0
RANBP2	9675	4	4	0.00219913	2.12766	50	25
RIMBP2	3159	4	4	0.00673523	2.12766	25	0
ROCK1	4065	4	4	0.00523409	2.12766	25	25
SAMD9	4770	4	4	0.0044605	2.12766	0	0
SEC24B	3597	4	4	0.00591509	2.12766	0	25
SESTD1	2091	4	4	0.0101753	2.12766	25	0
SLC12A9	2745	4	4	0.00775104	2.12766	0	0
SLC25A13	2013	4	4	0.0105696	2.12766	0	25
SLCO1B3	2109	4	4	0.0100885	2.12766	0	0
SLIT1	4605	4	4	0.00462032	2.12766	0	0
SMARCA4	4721	4	4	0.0045068	2.12766	0	25
SMG7	3607	4	4	0.0058987	2.12766	0	0
SOGA3	2844	4	4	0.00748122	2.12766	0	25
SORL1	6645	4	4	0.0032019	2.12766	0	0
SPATA17	1086	4	4	0.0195917	2.12766	0	0
SPEF2	5469	4	4	0.0038904	2.12766	25	0
SPEN	10851	4	4	0.0019608	2.12766	0	0
SPTB	7056	4	4	0.00301539	2.12766	0	0
SRCAP	9693	4	4	0.00219505	2.12766	0	0
SRRM2	7728	4	4	0.00275318	2.12766	0	0
SUPT6H	5181	4	4	0.00410666	2.12766	25	0
TCOF1	4390	4	4	0.0048466	2.12766	0	0
TET3	4983	4	4	0.00426984	2.12766	25	0
TGIF1	877	4	4	0.0242607	2.12766	75	0
TIAM1	4776	4	4	0.0044549	2.12766	0	0
TNKS1BP1	5190	4	4	0.00409954	2.12766	0	0
TNRC6B	5527	4	4	0.00384957	2.12766	75	0
TTLL7	2664	4	4	0.00798671	2.12766	25	0
UBR5	8288	4	4	0.00256716	2.12766	25	0
UHRF1BP1	4323	4	4	0.00492172	2.12766	0	25
USP34	10641	4	4	0.00199949	2.12766	0	0
VPS13A	9545	4	4	0.00222908	2.12766	0	25
VPS13C	11286	4	4	0.00188522	2.12766	0	0
ZDBF2	7065	4	4	0.00301155	2.12766	0	0
ZFHX3	11112	4	4	0.00191474	2.12766	0	25
ZHX2	2514	4	4	0.00846324	2.12766	25	0
ZMYM6	3978	4	5	0.00668571	2.12766	20	20
ZNF106	5652	4	4	0.00376444	2.12766	25	25
ZNF335	4029	4	4	0.00528086	2.12766	0	0
ZNF429	2025	4	4	0.010507	2.12766	25	25

## Sheet: Top5% MSIH Cell Lines
Gene Name	Gene Length Sequenced (bp)	Number of Mutated Samples	Number of Mutations	Mutations per Gene Length	Proportion of Mutated Samples (%)	Proportion of Nonsense & Frameshift Mutations (%)	Proportion of Mutations in Nucleotide Repeats (%)
					(n=19)
ACVR2A	1542	19	24	0.819169	100	91.7	83.3333
MLL2	16614	18	48	0.152059	94.7368	47.9	33.3333
RPL22	387	18	18	2.44798	94.7368	100	100
TTK	2574	18	24	0.490737	94.7368	87.5	87.5
LRP1	13635	17	37	0.142821	89.4737	43.2	37.8378
LTN1	5439	17	22	0.212887	89.4737	81.8	86.3636
MACF1	16284	17	22	0.0711063	89.4737	22.7	9.09091
OBSCN	25109	17	55	0.115287	89.4737	10.9	9.09091
TGFBR2	1704	17	20	0.617742	89.4737	75	75
FAM111B	2205	16	20	0.477384	84.2105	75	75
NCOR2	7357	16	21	0.150233	84.2105	9.5	4.7619
PLEC	14658	16	45	0.161579	84.2105	2.2	0
RNF145	2076	16	17	0.430991	84.2105	82.4	94.1176
SLC35F5	1572	16	17	0.569171	84.2105	94.1	94.1176
DST	20148	15	39	0.101878	78.9474	25.6	15.3846
MLL4	7785	15	32	0.21634	78.9474	37.5	37.5
MYH11	5370	15	20	0.196021	78.9474	60	55
NDUFC2	398	15	15	1.9836	78.9474	93.3	100
PTPRS	5847	15	22	0.198032	78.9474	13.6	9.09091
SPEG	9804	15	30	0.161051	78.9474	40	40
TMBIM4	717	15	15	1.10108	78.9474	93.3	93.3333
COL7A1	8835	14	22	0.131058	73.6842	22.7	13.6364
DDX27	2391	14	16	0.352198	73.6842	87.5	87.5
EPPK1	7263	14	20	0.144931	73.6842	20	10
MDN1	16787	14	28	0.0877872	73.6842	32.1	28.5714
SCAF1	3939	14	16	0.213787	73.6842	56.2	56.25
SEC63	2178	14	18	0.434972	73.6842	88.9	94.4444
STAB1	7713	14	26	0.177417	73.6842	46.2	38.4615
TAOK1	3006	14	16	0.280141	73.6842	0	87.5
TRRAP	11493	14	21	0.0961684	73.6842	9.5	9.52381
UBR5	8288	14	18	0.114306	73.6842	61.1	55.5556
ANK3	13459	13	26	0.101673	68.4211	30.8	26.9231
ARID1A	6858	13	18	0.138141	68.4211	77.8	77.7778
BCL9L	4500	13	24	0.280702	68.4211	79.2	87.5
BMPR2	3117	13	15	0.25328	68.4211	93.3	93.3333
C15orf40	504	13	15	1.56642	68.4211	66.7	86.6667
C5orf42	9594	13	18	0.0987459	68.4211	61.1	55.5556
DAB2IP	3399	13	19	0.294204	68.4211	57.9	47.3684
DMXL2	9111	13	17	0.098204	68.4211	47.1	35.2941
DNAH14	13536	13	18	0.0699888	68.4211	33.3	33.3333
ELMSAN1	2925	13	17	0.305893	68.4211	52.9	52.9412
EML6	5877	13	20	0.17911	68.4211	25	20
GLYR1	1662	13	18	0.570017	68.4211	61.1	66.6667
HECTD4	12009	13	23	0.100802	68.4211	26.1	30.4348
HSPG2	12526	13	22	0.0924393	68.4211	0	0
IRS1	3729	13	21	0.296397	68.4211	33.3	38.0952
KIAA1109	15018	13	31	0.108642	68.4211	25.8	16.129
KIAA1549	5666	13	16	0.148624	68.4211	43.8	37.5
KIAA2026	6312	13	19	0.158428	68.4211	57.9	52.6316
KIF26A	5649	13	20	0.186339	68.4211	35	35
LIMK2	2322	13	14	0.317331	68.4211	92.9	85.7143
PRRC2B	6473	13	17	0.138226	68.4211	11.8	5.88235
RNF213	15065	13	24	0.0838472	68.4211	20.8	20.8333
RNF43	2352	13	26	0.581812	68.4211	73.1	46.1538
RNPC3	1554	13	15	0.508027	68.4211	73.3	86.6667
USP35	3057	13	18	0.309901	68.4211	66.7	66.6667
ACACA	7205	12	16	0.116878	63.1579	18.8	0
ADNP	3309	12	12	0.190867	63.1579	91.7	91.6667
AGRN	6138	12	20	0.171494	63.1579	45	50
AKAP9	11700	12	20	0.0899685	63.1579	50	50
ANK2	11931	12	21	0.0926379	63.1579	33.3	23.8095
APC	8697	12	28	0.169447	63.1579	57.1	32.1429
BDP1	7875	12	21	0.140351	63.1579	42.9	33.3333
CEP350	9354	12	16	0.0900262	63.1579	18.8	12.5
CHD8	6909	12	18	0.137121	63.1579	55.6	50
DNAH1	12798	12	15	0.0616873	63.1579	0	0
DNAH11	13325	12	28	0.110595	63.1579	25	14.2857
DOCK3	6093	12	19	0.164123	63.1579	73.7	63.1579
DOCK4	5901	12	16	0.142706	63.1579	18.8	25
DOPEY1	7398	12	14	0.0996002	63.1579	28.6	14.2857
ESRP1	2055	12	14	0.358561	63.1579	78.6	78.5714
FASN	7536	12	22	0.153648	63.1579	13.6	13.6364
FHOD3	4320	12	13	0.158382	63.1579	46.2	46.1538
FRAS1	11890	12	17	0.0752512	63.1579	17.6	5.88235
GNAS	3994	12	21	0.276731	63.1579	14.3	4.7619
JARID2	3741	12	19	0.267308	63.1579	26.3	26.3158
MSH3	3177	12	13	0.215364	63.1579	53.8	53.8462
MXRA8	1329	12	12	0.475229	63.1579	83.3	83.3333
MYOF	6186	12	16	0.136131	63.1579	12.5	12.5
NBEA	8832	12	21	0.125143	63.1579	28.6	23.8095
PDS5B	4344	12	20	0.242319	63.1579	70	65
PHF2	3193	12	15	0.247251	63.1579	53.3	53.3333
PLXNB1	6408	12	15	0.123201	63.1579	33.3	33.3333
POLQ	7773	12	19	0.12865	63.1579	21.1	5.26316
PRKDC	12386	12	20	0.0849856	63.1579	25	10
PTCH1	4542	12	18	0.20858	63.1579	50	44.4444
SBF1	5682	12	15	0.138943	63.1579	20	20
SBNO1	4082	12	15	0.193404	63.1579	66.7	73.3333
SDK1	6417	12	16	0.13123	63.1579	25	18.75
SPECC1	3269	12	13	0.209303	63.1579	69.2	53.8462
SPEF2	5469	12	13	0.125107	63.1579	46.2	38.4615
SYNE2	20769	12	26	0.0658877	63.1579	34.6	30.7692
SYNJ2	4491	12	13	0.152351	63.1579	76.9	76.9231
TLN2	7629	12	18	0.12418	63.1579	5.6	0
TTC3	6078	12	16	0.13855	63.1579	68.8	62.5
UBR4	15552	12	19	0.0643004	63.1579	31.6	15.7895
USP34	10641	12	19	0.0939761	63.1579	21.1	10.5263
WNK1	7149	12	22	0.161966	63.1579	40.9	40.9091
XPOT	2889	12	13	0.236833	63.1579	92.3	92.3077
XYLT2	2598	12	13	0.26336	63.1579	76.9	76.9231
ZFHX3	11112	12	23	0.108939	63.1579	17.4	13.0435
ABCC5	4350	11	11	0.133091	57.8947	63.6	63.6364
ARAP1	4353	11	16	0.193454	57.8947	25	31.25
ASCC3	6704	11	16	0.125612	57.8947	43.8	43.75
BAX	545	11	11	1.06229	57.8947	100	100
BCL9	4281	11	13	0.159825	57.8947	53.8	53.8462
CAMSAP2	4437	11	15	0.17793	57.8947	66.7	66.6667
CAMTA2	3760	11	12	0.167973	57.8947	66.7	66.6667
CELSR2	8577	11	18	0.110455	57.8947	16.7	11.1111
CELSR3	9939	11	17	0.0900228	57.8947	29.4	23.5294
CIT	6084	11	15	0.129762	57.8947	13.3	6.66667
CR2	3279	11	12	0.192613	57.8947	41.7	41.6667
DAPK1	4293	11	14	0.171638	57.8947	21.4	28.5714
DNHD1	13965	11	20	0.0753764	57.8947	5	5
DOPEY2	6897	11	15	0.114466	57.8947	40	40
FAT1	13767	11	20	0.0764605	57.8947	15	0
FICD	1377	11	12	0.458663	57.8947	0	83.3333
GIGYF1	2937	11	16	0.286723	57.8947	50	43.75
GRB14	1623	11	15	0.486429	57.8947	66.7	66.6667
HERC2	14505	11	14	0.0507992	57.8947	7.1	0
IGF2R	7327	11	20	0.143665	57.8947	40	40
INO80E	735	11	11	0.787683	57.8947	100	100
JAG2	3300	11	13	0.207337	57.8947	7.7	0
KIAA1107	4065	11	13	0.168317	57.8947	38.5	30.7692
MAP2	5748	11	16	0.146504	57.8947	25	31.25
MEGF8	8337	11	23	0.145199	57.8947	21.7	13.0435
MUC2	8439	11	21	0.130971	57.8947	14.3	9.52381
MYCBP2	13945	11	25	0.0943556	57.8947	28	20
MYO9B	6485	11	15	0.121738	57.8947	13.3	13.3333
NIPBL	8185	11	20	0.128605	57.8947	40	40
NOTCH3	6848	11	20	0.153714	57.8947	25	30
OPLAH	3711	11	14	0.198556	57.8947	28.6	21.4286
PCNT	10011	11	14	0.0736032	57.8947	14.3	0
PLEKHA5	3661	11	11	0.158139	57.8947	54.5	54.5455
PRR12	6111	11	17	0.146414	57.8947	47.1	47.0588
RAD50	3939	11	13	0.173702	57.8947	84.6	84.6154
SACS	13740	11	28	0.107255	57.8947	46.4	39.2857
SETD1B	5566	11	13	0.122927	57.8947	46.2	23.0769
SLC23A2	1953	11	16	0.431185	57.8947	62.5	68.75
SMARCA4	4721	11	18	0.200671	57.8947	5.6	0
SPEN	10851	11	17	0.0824566	57.8947	17.6	11.7647
TAF1B	1767	11	13	0.387216	57.8947	84.6	84.6154
TCERG1	3297	11	12	0.191562	57.8947	58.3	50
TENC1	4335	11	14	0.169975	57.8947	42.9	35.7143
TENM3	8100	11	17	0.110461	57.8947	23.5	29.4118
TRIM59	1212	11	12	0.521105	57.8947	91.7	91.6667
TRIO	9137	11	15	0.086404	57.8947	40	26.6667
UTRN	10302	11	17	0.0868508	57.8947	35.3	23.5294
VPS13C	11286	11	12	0.0559613	57.8947	50	58.3333
WBP1	810	11	12	0.779727	57.8947	91.7	50
WDFY3	10581	11	17	0.0845607	57.8947	11.8	11.7647
AARS2	2958	10	12	0.213516	52.6316	16.7	0
ADAMTSL1	5289	10	17	0.169169	52.6316	47.1	41.1765
ARV1	816	10	10	0.644995	52.6316	70	70
ASTE1	1852	10	11	0.312607	52.6316	72.7	90.9091
ATP2A1	3011	10	14	0.244717	52.6316	35.7	35.7143
B4GALNT4	3120	10	13	0.219298	52.6316	53.8	53.8462
BACH2	2526	10	11	0.229195	52.6316	27.3	27.2727
BAHCC1	7490	10	16	0.112431	52.6316	25	12.5
BRPF1	3645	10	12	0.173273	52.6316	16.7	16.6667
CAMTA1	4907	10	12	0.12871	52.6316	16.7	8.33333
CASC5	6807	10	12	0.0927837	52.6316	41.7	33.3333
CCDC73	3204	10	14	0.229976	52.6316	92.9	92.8571
CEP290	7209	10	12	0.0876098	52.6316	83.3	83.3333
CHD7	8994	10	12	0.0702223	52.6316	41.7	41.6667
CLOCK	2136	10	11	0.271043	52.6316	81.8	81.8182
COL4A1	5010	10	12	0.126064	52.6316	50	50
CUX1	5363	10	14	0.137394	52.6316	14.3	7.14286
CYFIP1	4143	10	14	0.177852	52.6316	14.3	0
DYNC1H1	13941	10	16	0.0604049	52.6316	18.8	18.75
EIF5B	3663	10	13	0.18679	52.6316	61.5	61.5385
EP300	7245	10	18	0.130762	52.6316	66.7	55.5556
FANCA	3766	10	12	0.167706	52.6316	50	41.6667
FBXW7	2533	10	10	0.207784	52.6316	40	30
FGFR1	2467	10	11	0.234677	52.6316	9.1	0
FILIP1L	3429	10	11	0.168839	52.6316	81.8	72.7273
FNIP1	3501	10	11	0.165366	52.6316	27.3	27.2727
G2E3	2121	10	11	0.27296	52.6316	63.6	63.6364
GOLGB1	9781	10	12	0.064572	52.6316	33.3	33.3333
HMHA1	3411	10	11	0.16973	52.6316	9.1	9.09091
HNRNPL	1501	10	10	0.350643	52.6316	70	70
INTS1	6573	10	13	0.104094	52.6316	15.4	15.3846
KCNH2	3857	10	11	0.150103	52.6316	27.3	27.2727
KDM2B	4035	10	16	0.2087	52.6316	43.8	37.5
KDM5A	5073	10	14	0.145248	52.6316	64.3	57.1429
KDM6B	5049	10	14	0.145938	52.6316	7.1	14.2857
KIAA0586	4490	10	12	0.140663	52.6316	41.7	41.6667
KIAA1009	4212	10	13	0.162443	52.6316	76.9	76.9231
KIF26B	6327	10	15	0.124779	52.6316	0	0
KIF7	4032	10	12	0.156642	52.6316	25	25
KSR1	2284	10	12	0.276523	52.6316	83.3	66.6667
LAMB2	5397	10	11	0.107272	52.6316	18.2	0
LMAN1	1533	10	12	0.411989	52.6316	83.3	75
MAN2A1	3435	10	12	0.183866	52.6316	16.7	16.6667
MBD6	3012	10	19	0.332005	52.6316	57.9	57.8947
MLL3	14736	10	12	0.0428596	52.6316	33.3	33.3333
MYH14	6111	10	12	0.103351	52.6316	16.7	16.6667
N4BP2	5313	10	13	0.12878	52.6316	38.5	46.1538
NAV1	5625	10	16	0.149708	52.6316	31.2	31.25
NAV3	7092	10	11	0.0816339	52.6316	18.2	9.09091
NKTR	4389	10	15	0.179876	52.6316	66.7	66.6667
NRXN3	3532	10	13	0.193718	52.6316	15.4	7.69231
PARD3	3839	10	12	0.164517	52.6316	33.3	33.3333
PAXIP1	2821	10	14	0.261199	52.6316	50	35.7143
PCNXL3	6105	10	12	0.103453	52.6316	41.7	41.6667
PIK3CA	3207	10	13	0.213349	52.6316	0	0
PLCE1	7191	10	11	0.08051	52.6316	9.1	0
PLEKHG4	3576	10	12	0.176616	52.6316	16.7	25
PLXNA2	5685	10	15	0.13887	52.6316	26.7	20
PLXNB2	5517	10	16	0.152638	52.6316	0	0
PML	3483	10	13	0.196443	52.6316	38.5	23.0769
PNPLA6	4128	10	17	0.216748	52.6316	0	23.5294
PRDM2	5219	10	11	0.110931	52.6316	36.4	27.2727
PSME4	5532	10	14	0.133196	52.6316	14.3	21.4286
RFC3	1071	10	11	0.540567	52.6316	100	90.9091
RGS12	4415	10	12	0.143053	52.6316	33.3	41.6667
RIF1	7419	10	18	0.127695	52.6316	27.8	38.8889
SAFB2	2351	10	14	0.313416	52.6316	64.3	57.1429
SENP1	1932	10	11	0.299662	52.6316	90.9	72.7273
SHPRH	4980	10	11	0.116254	52.6316	54.5	63.6364
SLIT1	4605	10	12	0.137151	52.6316	50	25
SMC2	3594	10	11	0.161087	52.6316	54.5	54.5455
SNRNP200	6411	10	11	0.0903053	52.6316	0	0
SPTBN2	7173	10	17	0.124737	52.6316	0	0
SZT2	493	10	15	1.60137	52.6316	26.7	20
TACC2	8915	10	15	0.0885557	52.6316	26.7	26.6667
TCEB3	2397	10	13	0.285445	52.6316	92.3	76.9231
TMEM60	402	10	10	1.30924	52.6316	100	100
TNK2	3351	10	16	0.2513	52.6316	43.8	43.75
TRIOBP	7098	10	18	0.13347	52.6316	38.9	22.2222
TRMT10C	1212	10	10	0.434254	52.6316	90	90
TVP23A	642	10	11	0.901787	52.6316	81.8	72.7273
VEZT	2340	10	10	0.224921	52.6316	60	50
VPS13B	12178	10	16	0.0691497	52.6316	50	50
WNK2	6654	10	12	0.0949172	52.6316	41.7	33.3333
YLPM1	6441	10	15	0.12257	52.6316	40	40
ZDBF2	7065	10	16	0.119194	52.6316	62.5	62.5
ZNF292	8172	10	14	0.0901667	52.6316	57.1	42.8571
ABCA2	7398	9	16	0.113829	47.3684	6.2	0
ACACB	7377	9	12	0.0856146	47.3684	25	8.33333
AHCTF1	6808	9	9	0.0695776	47.3684	66.7	55.5556
AHDC1	4812	9	14	0.153126	47.3684	28.6	21.4286
AKAP7	1111	9	9	0.426358	47.3684	77.8	77.7778
ANKRD11	7992	9	12	0.0790264	47.3684	25	25
ANKRD50	4290	9	10	0.122684	47.3684	30	0
ANKS3	1971	9	12	0.320436	47.3684	8.3	8.33333
ARFGEF1	5550	9	13	0.123281	47.3684	46.2	46.1538
ARID1B	6729	9	12	0.0938593	47.3684	16.7	8.33333
ATAD5	5426	9	12	0.116399	47.3684	50	50
ATG2A	5817	9	10	0.0904789	47.3684	30	40
ATG9A	2520	9	9	0.18797	47.3684	11.1	0
ATP9A	3144	9	12	0.200884	47.3684	16.7	16.6667
BIRC6	14574	9	11	0.0397247	47.3684	0	0
BSN	11557	9	18	0.0819736	47.3684	22.2	16.6667
C2CD3	5892	9	10	0.0893272	47.3684	50	30
C6orf170	3550	9	10	0.148258	47.3684	30	30
CAMSAP3	3683	9	11	0.157195	47.3684	27.3	0
CASKIN1	4296	9	10	0.122513	47.3684	20	20
CCDC18	3885	9	10	0.135474	47.3684	60	60
CCDC40	3400	9	11	0.170279	47.3684	18.2	18.1818
CHD2	5350	9	14	0.137727	47.3684	64.3	50
CHD4	5739	9	10	0.0917086	47.3684	30	20
CHD6	8148	9	11	0.0710539	47.3684	27.3	0
CHD9	8646	9	15	0.0913109	47.3684	33.3	26.6667
CIC	4827	9	12	0.130843	47.3684	50	50
CLUH	3930	9	12	0.160707	47.3684	25	16.6667
COL18A1	4398	9	13	0.155573	47.3684	38.5	38.4615
COL27A1	5520	9	13	0.123951	47.3684	15.4	15.3846
CPSF1	4254	9	9	0.11135	47.3684	22.2	11.1111
CREBBP	7082	9	10	0.0743174	47.3684	20	20
CTNNB1	2346	9	10	0.224346	47.3684	0	0
DDX39B	1287	9	12	0.490737	47.3684	75	66.6667
DENND4A	5721	9	12	0.110397	47.3684	41.7	41.6667
DENND4C	5022	9	9	0.0943218	47.3684	22.2	22.2222
DEPDC5	4786	9	10	0.10997	47.3684	10	0
DHX37	3474	9	12	0.181802	47.3684	8.3	8.33333
DIAPH1	3810	9	12	0.165769	47.3684	25	16.6667
DLG5	5760	9	11	0.100512	47.3684	9.1	36.3636
DMXL1	8941	9	9	0.0529789	47.3684	55.6	44.4444
DOCK8	6247	9	12	0.101101	47.3684	50	50
EHMT1	3921	9	14	0.187922	47.3684	14.3	14.2857
EIF4G1	4801	9	10	0.109626	47.3684	30	10
EP400	8636	9	12	0.0731333	47.3684	0	0
EPHA2	2931	9	13	0.233439	47.3684	38.5	23.0769
FLNC	8079	9	13	0.08469	47.3684	0	0
FN1	7300	9	12	0.0865177	47.3684	0	0
FREM1	6446	9	11	0.089815	47.3684	18.2	18.1818
HDAC2	1467	9	9	0.322893	47.3684	88.9	88.8889
HIVEP3	7221	9	11	0.0801755	47.3684	54.5	45.4545
HNF1A	1896	9	9	0.249833	47.3684	55.6	33.3333
IFT140	4389	9	11	0.131909	47.3684	0	9.09091
ITGB4	5521	9	9	0.0857968	47.3684	11.1	0
JMJD1C	7401	9	13	0.0924484	47.3684	38.5	38.4615
KAT2B	2499	9	9	0.18955	47.3684	77.8	66.6667
KIAA0754	4284	9	11	0.135142	47.3684	36.4	36.3636
KIAA1549L	5550	9	11	0.104315	47.3684	9.1	0
KIAA1958	2151	9	10	0.244684	47.3684	0	90
KIF21B	4933	9	10	0.106693	47.3684	10	10
KLHL29	2628	9	12	0.240327	47.3684	16.7	8.33333
LARP1	3060	9	11	0.189198	47.3684	54.5	45.4545
MAP1B	7407	9	9	0.0639509	47.3684	44.4	33.3333
MAP7D1	2341	9	9	0.202343	47.3684	77.8	66.6667
MICAL3	6626	9	13	0.103261	47.3684	53.8	46.1538
MKI67	9771	9	9	0.0484786	47.3684	0	33.3333
MLH3	4362	9	9	0.108593	47.3684	88.9	88.8889
MLLT4	4932	9	13	0.138729	47.3684	46.2	23.0769
MMEL1	2240	9	9	0.211466	47.3684	55.6	33.3333
MTSS1L	2244	9	13	0.304907	47.3684	30.8	38.4615
MUC17	13482	9	9	0.0351346	47.3684	22.2	0
MYH7B	5947	9	10	0.0885011	47.3684	20	10
MYH9	5759	9	13	0.118807	47.3684	23.1	15.3846
MYO1A	3132	9	12	0.201654	47.3684	50	50
NFATC1	2525	9	11	0.229286	47.3684	18.2	0
NINL	4149	9	11	0.139539	47.3684	0	0
NOTCH1	7668	9	14	0.0960931	47.3684	14.3	21.4286
NOTCH2	7417	9	11	0.0780568	47.3684	18.2	18.1818
NUP214	6273	9	11	0.0922919	47.3684	45.5	45.4545
NYNRIN	5697	9	12	0.110862	47.3684	33.3	33.3333
PANX2	2034	9	9	0.232883	47.3684	11.1	33.3333
PCDHGA2	2424	9	10	0.217127	47.3684	20	0
PCDHGB6	2463	9	11	0.235058	47.3684	27.3	36.3636
PDS5A	3985	9	10	0.132074	47.3684	40	30
PEAR1	3114	9	10	0.169016	47.3684	20	20
PIEZO1	7417	9	15	0.106441	47.3684	6.7	13.3333
PITPNM1	3735	9	15	0.211372	47.3684	46.7	40
PLCB4	3585	9	13	0.190854	47.3684	7.7	15.3846
PNPLA7	4029	9	13	0.169821	47.3684	15.4	15.3846
POLD1	3324	9	16	0.253341	47.3684	12.5	12.5
PPP1R12C	2349	9	11	0.246465	47.3684	54.5	63.6364
PRDM15	4422	9	12	0.142827	47.3684	41.7	33.3333
PTPRF	5724	9	12	0.110339	47.3684	0	0
PTPRK	4341	9	10	0.121243	47.3684	60	40
RASAL2	3877	9	11	0.149329	47.3684	45.5	36.3636
RECQL	1667	9	9	0.284154	47.3684	66.7	55.5556
RIMBP2	3159	9	10	0.166608	47.3684	10	10
ROBO1	5011	9	12	0.126039	47.3684	41.7	25
ROCK2	4167	9	11	0.138936	47.3684	45.5	45.4545
RTTN	6536	9	12	0.0966308	47.3684	50	50
SCAF4	3444	9	9	0.137539	47.3684	66.7	44.4444
SHANK2	5349	9	13	0.127914	47.3684	7.7	0
SHANK3	4937	9	14	0.149249	47.3684	42.9	42.8571
SMC6	3276	9	11	0.176724	47.3684	100	100
SORBS2	4318	9	12	0.146267	47.3684	41.7	33.3333
SRCAP	9693	9	12	0.0651583	47.3684	25	25
SRPR	1757	9	11	0.329509	47.3684	81.8	72.7273
SUPT6H	5181	9	11	0.111744	47.3684	0	0
TAF1C	2441	9	9	0.194053	47.3684	44.4	44.4444
TCF7L2	2063	9	11	0.280634	47.3684	72.7	63.6364
TLN1	7626	9	12	0.0828192	47.3684	8.3	0
TNKS1BP1	5190	9	10	0.10141	47.3684	30	30
TNS1	5208	9	14	0.141483	47.3684	28.6	35.7143
TRIP12	5979	9	13	0.114436	47.3684	38.5	38.4615
TRPM2	4330	9	12	0.145861	47.3684	33.3	33.3333
TTC28	6968	9	9	0.0679799	47.3684	22.2	22.2222
UNK	2433	9	10	0.216324	47.3684	30	30
WDR33	4416	9	11	0.131102	47.3684	9.1	9.09091
WDR55	1152	9	9	0.411184	47.3684	88.9	88.8889
WNK4	3732	9	11	0.155131	47.3684	63.6	63.6364
ZC3H13	4139	9	14	0.178024	47.3684	28.6	28.5714
ZC3H18	2593	9	10	0.202976	47.3684	70	70
ZMYM4	4647	9	11	0.124585	47.3684	81.8	81.8182
ZNF518A	4451	9	10	0.118247	47.3684	100	90
ZNF609	4236	9	11	0.136673	47.3684	81.8	72.7273

## Sheet: Top5% MSIH TCGA Cancers
Gene Name	Gene Length Sequenced (bp)	Number of Mutated Samples	Number of Mutations	Mutations per Gene Length	Proportion of Mutated Samples (%)	Proportion of Nonsense & Frameshift Mutations (%)	Proportion of Mutations in Nucleotide Repeats (%)
					(n=28)
TGFBR2	1704	17	18	0.377264	60.7143	5.6	94.4444
BRAF	2301	15	16	0.248339	53.5714	0	6.25
FBXW7	2533	13	14	0.197394	46.4286	42.9	7.14286
MACF1	16284	13	18	0.0394778	46.4286	0	0
MYH11	5370	13	17	0.113062	46.4286	11.8	11.7647
ANK2	11931	12	15	0.044901	42.8571	6.7	6.66667
APC	8697	11	20	0.0821301	39.2857	70	5
MDN1	16787	11	17	0.0361674	39.2857	11.8	5.88235
PRDM2	5219	11	14	0.0958038	39.2857	14.3	57.1429
SDK1	6417	10	12	0.0667869	35.7143	8.3	0
WDFY3	10581	10	10	0.0337532	35.7143	40	30
ZC3H13	4139	10	12	0.103545	35.7143	50	8.33333
CHD6	8148	9	12	0.0525984	32.1429	16.7	0
ARID1A	6858	8	8	0.0416615	28.5714	25	12.5
KALRN	9109	8	11	0.0431285	28.5714	18.2	18.1818
PIK3CA	3207	8	8	0.0890908	28.5714	0	0
SRCAP	9693	8	9	0.0331609	28.5714	0	0
TCF7L2	2063	8	9	0.155806	28.5714	11.1	88.8889
TENM3	8100	8	9	0.0396825	28.5714	22.2	11.1111
AHNAK2	17333	7	10	0.0206048	25	20	0
ATM	9055	7	7	0.0276091	25	14.3	0
CDON	3796	7	7	0.0658588	25	14.3	0
DLC1	4668	7	10	0.0765088	25	0	0
DNMT1	4851	7	8	0.058898	25	12.5	0
DST	20148	7	8	0.0141808	25	12.5	0
ERBB3	4029	7	7	0.0620501	25	0	0
FN1	7300	7	7	0.0342466	25	14.3	0
HECTD4	12009	7	8	0.0237917	25	0	0
KRAS	687	7	7	0.363901	25	0	0
NRXN3	3532	7	7	0.0707814	25	0	0
RIMBP2	3159	7	7	0.079139	25	14.3	14.2857
VPS13B	12178	7	8	0.0234615	25	0	0
ABCA1	6786	6	6	0.0315776	21.4286	0	0
ACVR1B	1518	6	6	0.141163	21.4286	16.7	0
ARID2	5508	6	7	0.0453885	21.4286	28.6	0
ASCC3	6704	6	6	0.0319639	21.4286	16.7	0
ASH1L	8808	6	9	0.0364928	21.4286	11.1	11.1111
AXIN2	2532	6	7	0.0987362	21.4286	28.6	57.1429
FCGBP	15070	6	6	0.0142194	21.4286	16.7	16.6667
MAP2	5748	6	8	0.0497067	21.4286	12.5	12.5
NFASC	3858	6	6	0.0555432	21.4286	16.7	16.6667
NOTCH3	6848	6	7	0.036507	21.4286	0	0
PTPRM	4398	6	8	0.0649646	21.4286	0	0
SPTB	7056	6	6	0.0303693	21.4286	0	0
SRRM2	7728	6	7	0.0323499	21.4286	0	0
TAF1L	5481	6	6	0.0390961	21.4286	16.7	16.6667
ZFHX3	11112	6	6	0.0192842	21.4286	0	0
BSN	11557	5	5	0.0154514	17.8571	0	0
CASZ1	5284	5	5	0.0337947	17.8571	0	0
CHD4	5739	5	6	0.0373385	17.8571	16.7	0
DAPK1	4293	5	6	0.0499151	17.8571	16.7	16.6667
DYNC1H1	13941	5	6	0.0153709	17.8571	0	0
FAT1	13767	5	7	0.0181594	17.8571	14.3	0
HEATR1	6435	5	5	0.02775	17.8571	0	20
HERC2	14505	5	7	0.0172354	17.8571	28.6	42.8571
LRP6	4842	5	5	0.0368797	17.8571	20	0
MTOR	7401	5	5	0.024128	17.8571	0	0
MYH14	6111	5	6	0.0350656	17.8571	33.3	16.6667
NAV3	7092	5	5	0.0251793	17.8571	20	20
OBSCN	25109	5	6	0.00853422	17.8571	16.7	16.6667
PCDHA3	2394	5	5	0.0745912	17.8571	0	0
PI4KA	6153	5	6	0.0348262	17.8571	33.3	16.6667
REV3L	9393	5	5	0.0190111	17.8571	20	20
ROBO1	5011	5	5	0.0356359	17.8571	0	0
SACS	13740	5	6	0.0155958	17.8571	0	16.6667
SMAD4	1659	5	7	0.150693	17.8571	14.3	14.2857
SPEN	10851	5	6	0.019748	17.8571	16.7	16.6667
SUPT6H	5181	5	7	0.0482532	17.8571	0	0
TNC	6606	5	6	0.032438	17.8571	0	0
TP53	1182	5	5	0.151076	17.8571	20	20
TRPS1	3885	5	5	0.0459643	17.8571	20	0
UTRN	10302	5	5	0.0173337	17.8571	20	20
ZNF106	5652	5	5	0.0315944	17.8571	40	20
APLP1	1956	4	4	0.0730353	14.2857	0	0
ARAP2	5115	4	4	0.0279291	14.2857	25	0
ASTN2	3892	4	4	0.0367053	14.2857	0	0
BCL9L	4500	4	5	0.0396825	14.2857	20	20
C5orf42	9594	4	4	0.0148903	14.2857	0	0
CARD11	3465	4	4	0.0412286	14.2857	0	0
DNAH11	13325	4	5	0.0134012	14.2857	20	0
EPG5	7740	4	5	0.0230712	14.2857	20	0
FAM65A	3684	4	4	0.0387777	14.2857	0	0
GTF2IRD1	2744	4	5	0.0650771	14.2857	0	0
GTF3C1	6330	4	4	0.0225683	14.2857	25	25
IFT80	2332	4	4	0.0612595	14.2857	25	0
ITPR1	8130	4	4	0.0175716	14.2857	0	0
KDM5B	4431	4	4	0.0322404	14.2857	0	0
KIAA1804	3111	4	5	0.0574	14.2857	20	20
LAMA3	10173	4	4	0.0140428	14.2857	0	0
MAP1B	7407	4	4	0.0192868	14.2857	0	0
MAP2K4	1085	4	4	0.131666	14.2857	0	0
MAPKBP1	4545	4	4	0.0314317	14.2857	50	50
MLL3	14736	4	4	0.00969443	14.2857	0	0
MUC17	13482	4	5	0.0132452	14.2857	20	0
OGDHL	3033	4	4	0.0471009	14.2857	0	0
PCDHA13	2394	4	4	0.059673	14.2857	0	0
RNF213	15065	4	6	0.0142241	14.2857	0	0
SLC12A9	2745	4	4	0.0520427	14.2857	0	0
SLIT1	4605	4	4	0.0310222	14.2857	25	25
SOGA3	2844	4	4	0.0502311	14.2857	0	25
SORL1	6645	4	4	0.0214984	14.2857	0	0
TIAM1	4776	4	4	0.0299115	14.2857	0	0
VPS13A	9545	4	4	0.0149667	14.2857	25	25
VPS13C	11286	4	5	0.0158224	14.2857	0	0
ZDBF2	7065	4	4	0.0202204	14.2857	50	0
ZHX2	2514	4	4	0.0568246	14.2857	25	25
ADCY1	3360	3	3	0.0318878	10.7143	0	0
AGPAT4	1137	3	4	0.125644	10.7143	50	50
ALPK1	3727	3	3	0.0287477	10.7143	0	33.3333
AMOTL1	2871	3	4	0.0497587	10.7143	0	0
ARHGAP21	5877	3	3	0.0182309	10.7143	0	0
CADPS	4131	3	4	0.0345817	10.7143	25	0
CCDC88A	5616	3	5	0.0317969	10.7143	20	20
CIZ1	2305	3	3	0.0464828	10.7143	0	0
CNTNAP2	3996	3	3	0.0268125	10.7143	0	0
COL4A1	5010	3	4	0.0285144	10.7143	0	0
DYNC2H1	12945	3	6	0.0165536	10.7143	16.7	0
FAM5C	2301	3	3	0.0465636	10.7143	0	0
GALNT14	1659	3	3	0.0645828	10.7143	0	33.3333
HDAC9	3251	3	3	0.0329569	10.7143	33.3	0
IQGAP2	4728	3	3	0.0226613	10.7143	0	0
ISL1	1050	3	4	0.136054	10.7143	0	0
JARID2	3741	3	4	0.0381869	10.7143	0	0
MAN2A1	3435	3	4	0.0415887	10.7143	0	0
ME1	1641	3	3	0.0652912	10.7143	33.3	33.3333
MRC2	4440	3	3	0.0241313	10.7143	0	0
NUP205	6039	3	3	0.0177418	10.7143	0	0
OSBPL6	2919	3	3	0.0367053	10.7143	0	0
PCDHGA2	2424	3	3	0.0442008	10.7143	0	0
PCNT	10011	3	4	0.01427	10.7143	25	25
PRKD1	2739	3	3	0.0391175	10.7143	0	0
RALGAPA1	6260	3	3	0.0171155	10.7143	0	0
SAMD9	4770	3	3	0.0224618	10.7143	0	33.3333
SCN5A	6140	3	3	0.01745	10.7143	0	0
SDK2	6402	3	4	0.0223145	10.7143	0	0
SESTD1	2091	3	3	0.05124	10.7143	0	0
SLC44A5	2267	3	5	0.0787699	10.7143	0	0
SPATA17	1086	3	3	0.0986582	10.7143	0	0
TRPA1	3360	3	3	0.0318878	10.7143	0	0
BACH2	2526	2	2	0.0282773	7.14286	0	0
CBLB	2949	2	2	0.0242213	7.14286	0	0
CHD2	5350	2	2	0.0133511	7.14286	0	0
CHST4	1161	2	2	0.0615233	7.14286	50	50
CRTC1	1644	2	2	0.043448	7.14286	100	100
DMXL1	8941	2	2	0.00798888	7.14286	0	0
DNAJC13	6732	2	2	0.0106103	7.14286	0	0
DOCK9	6395	2	2	0.0111694	7.14286	0	0
ERBB2	3695	2	2	0.0193311	7.14286	0	0
MCM10	2628	2	2	0.0271798	7.14286	0	0
PDE10A	2370	2	2	0.0301386	7.14286	0	0
PHLDB1	3993	2	2	0.0178884	7.14286	0	0
PIK3C2B	4905	2	2	0.0145624	7.14286	0	0
PNPLA7	4029	2	2	0.0177286	7.14286	0	0
PTPRU	4286	2	2	0.0166656	7.14286	0	0
RANBP2	9675	2	2	0.0073828	7.14286	0	0
ROCK1	4065	2	2	0.0175716	7.14286	0	0
SEC24B	3597	2	2	0.0198578	7.14286	0	0
SETX	8034	2	2	0.00889079	7.14286	0	0
STAG1	3777	2	2	0.0189115	7.14286	0	0
TET3	4983	2	2	0.0143345	7.14286	0	0
TNS1	5208	2	2	0.0137152	7.14286	0	0
UBR5	8288	2	2	0.00861831	7.14286	50	0
USP34	10641	2	2	0.00671258	7.14286	0	0
ZCCHC6	4488	2	2	0.0159155	7.14286	50	0
ZMYM6	3978	2	2	0.0179559	7.14286	0	50
ZNF335	4029	2	2	0.0177286	7.14286	0	50
ABL2	3598	1	1	0.00992615	3.57143	0	0
ADAR	3624	1	1	0.00985494	3.57143	0	0
ADNP	3309	1	1	0.0107931	3.57143	0	0
C5	5031	1	1	0.00709884	3.57143	100	0
CNTRL	6978	1	1	0.00511813	3.57143	0	100
DAB1	1668	1	1	0.0214114	3.57143	0	0
GNAS	3994	1	1	0.00894198	3.57143	0	0
MYO5A	5541	1	1	0.00644546	3.57143	0	0
NBEA	8832	1	1	0.00404374	3.57143	100	0
NELL2	2691	1	1	0.0132718	3.57143	0	0
NRAS	570	1	1	0.0626566	3.57143	0	0
PCCA	2133	1	1	0.0167437	3.57143	0	0
PCDHGB2	2434	1	1	0.0146731	3.57143	0	0
PIK3R1	2297	1	1	0.0155482	3.57143	0	0
PLEKHG1	4158	1	1	0.00858929	3.57143	0	0
SLCO1B3	2109	1	1	0.0169342	3.57143	0	0
SMAD2	1404	1	1	0.0254375	3.57143	0	0
SMARCA4	4721	1	1	0.00756498	3.57143	0	0
SOX9	1530	1	1	0.0233427	3.57143	100	100
TNKS1BP1	5190	1	1	0.00688137	3.57143	0	0
TNRC6B	5527	1	1	0.00646179	3.57143	100	0
TTLL7	2664	1	1	0.0134063	3.57143	100	100
