# Supplementary material for: Colorectal Cancer Cell Lines Are Representative Models of the Main Molecular Subtypes of Primary Cancer
Source: Oxford University Press journal article supplement (doi:10.1158/0008-5472.can-14-0013), 2014-04-23
Supplement: 00085472can140013-sup-tab8.xlsx [file 00085472can140013-sup-tab8.xlsx]

## Sheet: Overlap Top5% NonHyp
Supplementary Table 8
	Cell Lines	TCGA Cancers
Gene Name	Proportion of Mutated Samples (%)	Proportion of Mutated Samples (%)	Pathway	Tumour Types (Somatic Mutations)	Tumour Types (Germline Mutations)	Cancer Syndrome
	(n=41)	(n=188)
APC	85.3659	79.2553	WNT	colorectal, pancreatic, desmoid, hepatoblastoma, glioma, other CNS	colorectal, pancreatic, desmoid, hepatoblastoma, glioma, other CNS	adenomatous polyposis coli; Turcot syndrome
TP53	65.8537	59.5745	p53	breast, colorectal, lung, sarcoma, adrenocortical, glioma, multiple other tumour types	breast, sarcoma, adrenocortical carcinoma, glioma, multiple other tumour types	Li-Fraumeni syndrome
KRAS	60.9756	44.1489	MAPK	pancreatic, colorectal, lung, thyroid, AML, other tumour types	.	.
OBSCN	31.7073	2.12766	.	.	.	.
SMAD4	29.2683	10.1064	TGFbeta	colorectal, pancreatic, small intestine	gastrointestinal polyp	juvenile polyposis
CHD6	19.5122	2.12766	Chromatin remodeling	.	.	.
DYNC2H1	19.5122	3.19149	.	.	.	.
DNAH11	17.0732	4.25532	.	.	.	.
DST	17.0732	2.12766	.	.	.	.
MAP2	17.0732	3.19149	.	.	.	.
MLL3	17.0732	2.65957	Chromatin remodeling	medulloblastoma	.	.
PIK3CA	17.0732	17.5532	PI3K	colorectal, gastric, glioblastoma, breast	.	.
ZDBF2	17.0732	2.12766	.	.	.	.
ANK2	14.6341	6.91489	.	.	.	.
BSN	14.6341	2.65957	.	.	.	.
SACS	14.6341	5.85106	.	.	.	.
SOX9	14.6341	4.25532	WNT	.	.	.
ZFHX3	14.6341	2.12766	.	.	.	.
ATM	12.1951	5.85106	p53	T-PLL	leukaemia, lymphoma, medulloblastoma, glioma	ataxia-telangiectasia
MPDZ	12.1951	2.12766	.	.	.	.
AXIN2	9.7561	3.19149	WNT	.	.	.
BCL9L	9.7561	2.65957	WNT	.	.	.
ERBB3	9.7561	3.19149	MAPK	.	.	.
NOTCH3	9.7561	2.65957	.	.	.	.
PHLDB1	9.7561	2.12766	.	.	.	.
PIK3C2B	9.7561	2.12766	PI3K	.	.	.
ROBO1	9.7561	4.78723	.	.	.	.
SCN5A	9.7561	2.65957	.	.	.	.
SRRM2	9.7561	2.12766	.	.	.	.
TENM3	9.7561	2.65957	.	.	.	.
TRPA1	9.7561	2.65957	.	.	.	.
UGGT2	9.7561	4.25532	.	.	.	.
ABCA1	7.31707	3.7234	.	.	.	.
ADCY1	7.31707	2.65957	.	.	.	.
ASH1L	7.31707	2.12766	Chromatin remodeling	.	.	.
BRAF	7.31707	2.65957	MAPK	melanoma, colorectal, papillary thyroid, borderline ovarian, NSCLC, cholangiocarcinoma, pilocytic astrocytoma	.	.
CTNNB1	7.31707	4.78723	WNT	colorectal, ovarian, hepatoblastoma, pleomorphic salivary gland adenoma, other tumour types	.	.
DMXL1	7.31707	3.19149	.	.	.	.
EPG5	7.31707	2.12766	.	.	.	.
FAT1	7.31707	2.12766	WNT	.	.	.
FBXW7	7.31707	10.6383	WNT	colorectal, endometrial, T-ALL	.	.
FN1	7.31707	4.25532	.	.	.	.
GTF3C1	7.31707	2.12766	.	.	.	.
ITPR1	7.31707	2.12766	.	.	.	.
MRC2	7.31707	3.19149	.	.	.	.
NUP205	7.31707	2.12766	.	.	.	.
PRDM2	7.31707	2.12766	Chromatin remodeling	.	.	.
PTPRU	7.31707	3.19149	.	.	.	.
RALGAPA1	7.31707	2.65957	.	.	.	.
SDK1	7.31707	6.91489	.	.	.	.
SPEN	7.31707	2.12766	.	.	.	.
TIAM1	7.31707	2.12766	PI3K	.	.	.
USP34	7.31707	2.12766	.	.	.	.
UTRN	7.31707	2.65957	.	.	.	.

## Sheet: Overlap Top5% MSI-H
	Cell Lines	TCGA Cancers
Gene Name	Proportion of Mutated Samples (%)	Proportion of Mutated Samples (%)	Pathway	Tumour Types (Somatic Mutations)	Tumour Types (Germline Mutations)	Cancer Syndrome
	(n=19)	(n=28)
ACVR2A	100	67.8571	TGFbeta	.	.	.
MLL2	94.7368	25	Chromatin remodeling	medulloblastoma, renal	.	.
LRP1	89.4737	25	.	.	.	.
MACF1	89.4737	46.4286	.	.	.	.
TGFBR2	89.4737	60.7143	TGFbeta	.	.	.
DST	78.9474	25	.	.	.	.
MYH11	78.9474	46.4286	.	AML	.	.
MDN1	73.6842	39.2857	.	.	.	.
SEC63	73.6842	50	.	.	.	.
TRRAP	73.6842	35.7143	Chromatin remodeling	.	.	.
ANK3	68.421	35.7143	.	.	.	.
ARID1A	68.421	28.5714	Chromatin remodeling	clear cell ovarian carcinoma, RCC	.	.
HECTD4	68.421	25	.	.	.	.
HSPG2	68.421	21.4286	.	.	.	.
KIAA1109	68.421	32.1429	.	.	.	.
RNF43	68.421	21.4286	WNT	cholangiocarcinoma, ovary, pancreas	.	.
AKAP9	63.1579	32.1429	.	papillary thyroid	.	.
ANK2	63.1579	42.8571	.	.	.	.
APC	63.1579	39.2857	WNT	colorectal, pancreatic, desmoid, hepatoblastoma, glioma, other CNS	colorectal, pancreatic, desmoid, hepatoblastoma, glioma, other CNS	adenomatous polyposis coli; Turcot syndrome
DNAH1	63.1579	25	.	.	.	.
DOPEY1	63.1579	21.4286	.	.	.	.
FHOD3	63.1579	21.4286	.	.	.	.
MSH3	63.1579	42.8571	.	.	.	.
PRKDC	63.1579	21.4286	.	.	.	.
PTCH1	63.1579	25	.	.	.	.
SDK1	63.1579	35.7143	.	.	.	.
UBR4	63.1579	21.4286	.	.	.	.
ZFHX3	63.1579	21.4286	.	.	.	.
ASCC3	57.8947	21.4286	.	.	.	.
CIT	57.8947	25	.	.	.	.
GRB14	57.8947	35.7143	.	.	.	.
IGF2R	57.8947	32.1429	.	.	.	.
MAP2	57.8947	21.4286	.	.	.	.
MYCBP2	57.8947	25	.	.	.	.
NIPBL	57.8947	28.5714	.	.	.	.
NOTCH3	57.8947	21.4286	.	.	.	.
RAD50	57.8947	28.5714	.	.	.	.
TCERG1	57.8947	28.5714	.	.	.	.
TENM3	57.8947	28.5714	.	.	.	.
WDFY3	57.8947	35.7143	.	.	.	.
EP300	52.6316	21.4286	Chromatin remodeling	colorectal, breast, pancreatic, AML, ALL, DLBCL	.	.
FBXW7	52.6316	46.4286	WNT	colorectal, endometrial, T-ALL	.	.
NRXN3	52.6316	25	.	.	.	.
PIK3CA	52.6316	28.5714	PI3K	colorectal, gastric, glioblastoma, breast	.	.
PRDM2	52.6316	39.2857	Chromatin remodeling	.	.	.
SPTBN2	52.6316	21.4286	.	.	.	.
VPS13B	52.6316	25	.	.	.	.
ZNF292	52.6316	28.5714	.	.	.	.
ANKRD50	47.3684	21.4286	.	.	.	.
CHD6	47.3684	32.1429	Chromatin remodeling	.	.	.
CREBBP	47.3684	46.4286	WNT	ALL, AML, DLBCL, B-NHL	.	.
EP400	47.3684	21.4286	Chromatin remodeling	.	.	.
FLNC	47.3684	25	.	.	.	.
FN1	47.3684	25	.	.	.
MKI67	47.3684	39.2857	.	.	.	.
MYH9	47.3684	21.4286	.	ALCL	.	.
NOTCH2	47.3684	25	.	marginal zone lymphoma, DLBCL	.	.
RIMBP2	47.3684	25	.	.	.	.
SRCAP	47.3684	28.5714	Chromatin remodeling	.	.	.
TCF7L2	47.3684	28.5714	WNT	colorectal	.	.
TRPM2	47.3684	21.4286	.	.	.	.
ZC3H13	47.3684	35.7143	.	.	.	.
