# Supplementary material for: Colorectal Cancer Cell Lines Are Representative Models of the Main Molecular Subtypes of Primary Cancer
Source: Oxford University Press journal article supplement (doi:10.1158/0008-5472.can-14-0013), 2014-04-23
Supplement: 00085472can140013-sup-tab9.xlsx [file 00085472can140013-sup-tab9.xlsx]

## Sheet: Sheet1
Supplementary Table 9
Cell line pair	Number of discordant mutations	Assumed mutation rate (per bp per cell generation)	Estimated minimum number of cell replications
COLO201/COLO205	63	10^-8	103
CX1/HT29	356	10^-8	552
SW480/SW620	849	10^-8	1305
Gp2D/Gp5D	2763	10^-6	42
LS174T/LS180	480	10^-6	8
DLD1/HCT8	6503	10^-6	99
DLD1/HCT15	5377	10^-6	82
HCT8/HCT15	6369	10^-6	97
